# Supplementary material for: Squaramide-catalysed asymmetric Michael addition/cyclization cascade reaction of 4-arylmethylidene-2,3-dioxopyrrolidines with 2-isothiocyanato-1-indanones
Source: Royal Society of Chemistry journal article supplement (doi:10.1039/d1ob01223a), 2021-01-01
Supplement: d1ob01223a1.pdf [file d1ob01223a1.pdf]

**Squaramide–Catalysed Asymmetric Michael Addition/Cyclization Cascade  
Reaction of 4-Arylmethylidene-2,3-dioxopyrrolidines with 2-isothiocyanato-1-  
indanones for Synthesis of Spiropyrolidinones**

Xi-Qiang Hou,<sup>a</sup> Jiang-Bo Wen,<sup>a</sup> Li Yan<sup>b</sup> and Da-Ming Du<sup>a,\*</sup>

*<sup>a</sup>School of Chemistry and Chemical Engineering, Beijing Institute of Technology,  
Beijing 100081, People's Republic of China*

*<sup>b</sup>Analytical and Testing Center, Beijing Institute of Technology, Liangxiang Campus, Beijing  
102488, People's Republic of China*

[dudm@bit.edu.cn](mailto:dudm@bit.edu.cn)

***Supporting Information***

**Contents**

|                                                                                  |     |
|----------------------------------------------------------------------------------|-----|
| 1. General information and starting materials.....                               | S1  |
| 2. General procedure for the preparation of substrates .....                     | S1  |
| 3. Procedure for the synthesis of racemates of <b>3</b> .....                    | S2  |
| 4. Procedure for the synthesis of chiral compounds <b>3</b> .....                | S2  |
| 5. Procedure for the synthesis of compound <b>4</b> and <b>5</b> .....           | S13 |
| 6. References.....                                                               | S14 |
| 7. Copies of <sup>1</sup> H and <sup>13</sup> C NMR spectra of new products..... | S15 |
| 8. Copies of HPLC chromatograms of new products.....                             | S39 |

## 1. General information and starting materials

Commercially available compounds were used without further purification. Solvents were dried according to standard procedures. Column chromatography was performed with silica gel (200-300 mesh). Melting points were determined with an XT-4 melting-point apparatus and are uncorrected.  $^1\text{H}$  NMR spectra were measured with Bruker Ascend 400 MHz spectrometer in  $\text{CDCl}_3$ , chemical shifts were reported in  $\delta$  (ppm) units relative to tetramethylsilane (TMS) as the internal standard.  $^{13}\text{C}$  NMR spectra were measured at 100 MHz (Bruker Ascend 400 MHz spectrometer), chemical shifts were reported in ppm relative to TMS with the solvent resonance as internal standard ( $\text{CDCl}_3$ ,  $\delta(\text{C}) = 77.00$  ppm;  $\text{DMSO}-d_6$ ,  $\delta(\text{C}) = 39.43$  ppm). Proton coupling patterns are described as broad (br) singlet (s), doublet (d), triplet (t), quartet (q) and multiplet (m). High resolution mass spectra were measured with an Agilent 6520 Accurate-Mass-Q-TOF MS system equipped with an electrospray ionization (ESI) source. Enantiomeric excesses were determined by chiral HPLC analysis using an Agilent 1200 LC instrument with a Daicel Chiralpak IA, IC or AD-H column.

## 2. General procedures for the preparation of substrates.

The 4-arylmethylidene-2,3-dioxopyrrolidines **1a-1r** were prepared according to the reported literature procedures.<sup>1</sup>

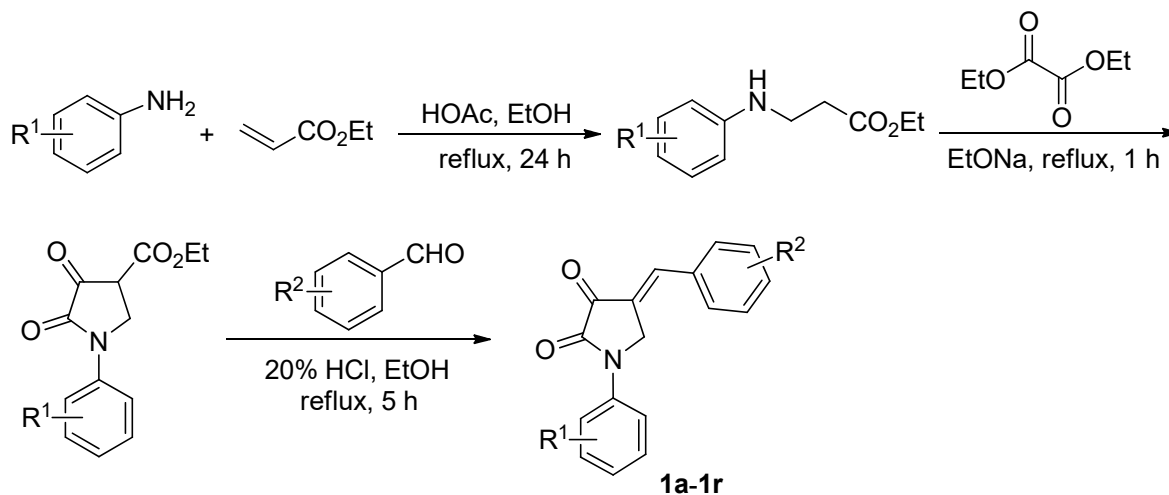

The 2-isothiocyanato-1-indanones **2a-2d** were prepared according to the reported literature procedures.<sup>2</sup>

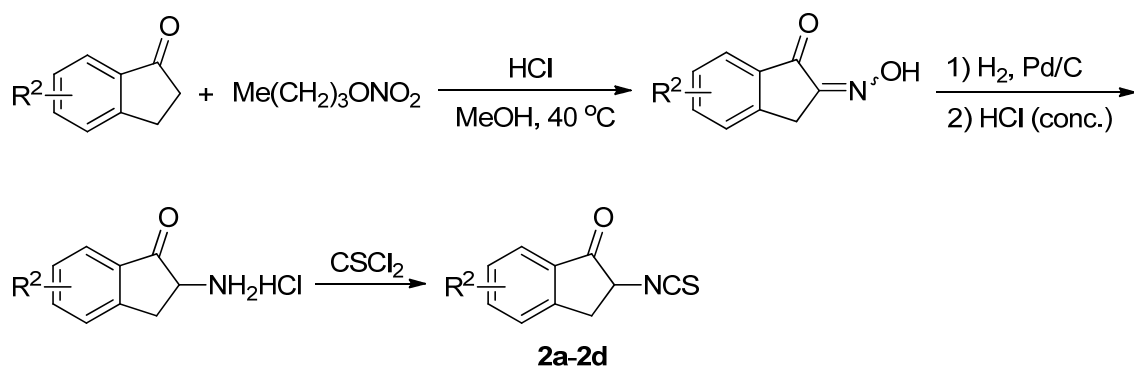

### 3. Procedure for the synthesis of racemates of **3**

To a dried small bottle were added **2** (0.12 mmol, 1.2 equiv.), **1** (0.1 mmol, 1.0 equiv.) and squaramide catalyst (10 mol%) in 1.0 ml of DCM, the mixture was stirred at room temperature overnight. When the reaction completed detected by TLC, the reaction mixture was concentrated and directly purified by silica gel column chromatography to afford the racemates of **3**.

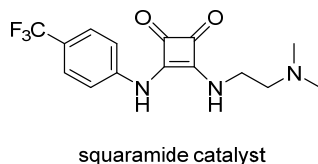

### 4. Procedure for the synthesis of chiral compound **3**

To a dried small bottle were added 2,3-dioxopyrrolidines **1** (0.1mmol), 2-isothiocyanato-1-indanone **2** (0.12 mmol), squaramide catalyst **C8** (5 mol%) in 2.0 mL of AcOEt at room temperature. The reaction mixture was stirred for 15 h and the progress of the reaction was monitored by TLC analysis (Petroleum ether/ ethyl acetate = 1:1). After the completion of the reaction, the crude product mixture was purified by flash column chromatography on silica (petroleum ether/ethyl acetate = 5:1–3:1) to afford the pure product **3**.

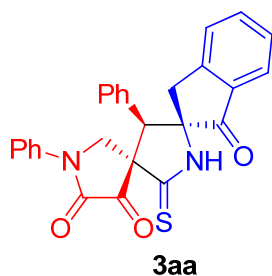

#### **(2*R*,3'*R*,4'*S*)-1'',3'-Diphenyl-5'-thioxodispiro[indene-2,2'-pyrrolidine-4',3''-pyrrolidine]-**

**1,4'',5'''(3*H*)-trione (**3aa**). **3aa** was obtained as a light yellow solid (42.5 mg, 94% yield), m.p. 230–232 °C. HPLC (Daicel Chiralpak IA, *n*-hexane/2-propanol = 75:25, flow rate 1.0 mL/min, detection at 254 nm):  $t_R$  = 12.0 min (minor),  $t_R$  = 24.0 min (major), 93% ee.  $[\alpha]_D^{20}$  =  $-80.7$  ( $c$  0.62,  $\text{CH}_2\text{Cl}_2$ ).  $^1\text{H NMR}$  (400 MHz,  $\text{CDCl}_3$ ):  $\delta$  8.90 (s, 1H, NH), 7.78 (d,  $J$  = 7.6 Hz, 2H, ArH), 7.71 (d,  $J$  = 7.6 Hz, 1H, ArH), 7.58 (t,  $J$  = 7.2 Hz, 1H, ArH), 7.43 (t,  $J$  = 7.6 Hz, 2H, ArH), 7.36–7.28 (m, 3H, ArH), 7.19–7.12 (m, 3H, ArH), 6.95–6.93 (m, 2H, ArH), 4.92 (d,  $J$  = 10.8 Hz,  $\text{NCH}_2$ ), 4.42 (s,**

1H, CH), 4.00 (d,  $J = 10.8$  Hz, 1H, NCH<sub>2</sub>), 3.86 (d,  $J = 18.4$  Hz, CH<sub>2</sub>), 3.66 (d,  $J = 18.8$  Hz, CH<sub>2</sub>) ppm; <sup>13</sup>C NMR (100 MHz, CDCl<sub>3</sub>):  $\delta$  202.1, 199.2, 195.7, 155.9, 152.2, 138.1, 137.0, 133.9, 130.9, 129.31, 129.28, 129.1, 128.9, 128.2, 127.2, 126.7, 124.7, 119.7, 74.1, 64.3, 57.7, 51.5, 37.4 ppm. HRMS (ESI):  $m/z$  calcd for C<sub>27</sub>H<sub>21</sub>N<sub>2</sub>O<sub>3</sub>S [M + H]<sup>+</sup> 453.1276, found 453.1272.

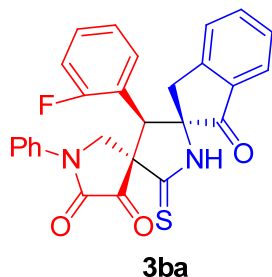

**(2R,3'R,4'S)-3'-(2-Fluorophenyl)-1''-phenyl-5'-thioxodispiro[indene-2,2'-pyrrolidine-4',3''-pyrrolidine]-1,4'',5''(3H)-trione (3ba).** **3ba** was obtained as a white solid (40.9 mg, 87% yield), m.p. 158–160 °C. HPLC (Daicel Chiralpak IB, *n*-hexane/2-propanol = 90:10, flow rate 1.0 mL/min, detection at 254 nm):  $t_R = 54.7$  min (major),  $t_R = 68.0$  min (minor); 94% *ee*.  $[\alpha]_D^{20} = -199.8$  (c 0.40, CH<sub>2</sub>Cl<sub>2</sub>): <sup>1</sup>H NMR (400 MHz, CDCl<sub>3</sub>):  $\delta$  8.60 (s, 1H, NH), 7.82 (d,  $J = 8.0$  Hz, 2H, ArH), 7.76 (d,  $J = 7.6$  Hz, 1H, ArH), 7.57 (t,  $J = 7.6$  Hz, 1H, ArH), 7.45 (t,  $J = 8.0$  Hz, 2H, ArH), 7.38–7.29 (m, 3H, ArH), 7.19–7.14 (m, 1H, ArH), 7.10–6.99 (m, 2H, ArH), 6.84–6.79 (m, 1H, ArH), 4.93 (d,  $J = 10.4$  Hz, 1H, NCH<sub>2</sub>), 4.69 (s, 1H, CH), 3.99 (d,  $J = 10.8$  Hz, 1H, NCH<sub>2</sub>), 3.83 (d,  $J = 18.4$  Hz, 1H, CH<sub>2</sub>), 3.60 (d,  $J = 18.0$  Hz, 1H, CH<sub>2</sub>) ppm; <sup>13</sup>C NMR (100 MHz, CDCl<sub>3</sub>):  $\delta$  201.4, 198.7, 195.3, 160.9 (<sup>1</sup> $J_{C-F} = 246.6$  Hz), 155.9, 151.1, 138.1, 136.8, 133.7, 130.7 (<sup>3</sup> $J_{C-F} = 8.9$  Hz), 129.5 (<sup>4</sup> $J_{C-F} = 2.2$  Hz), 129.3, 128.3, 127.2, 126.5, 124.91, 124.87, 124.86, 119.7, 116.2 (<sup>2</sup> $J_{C-F} = 23.1$  Hz), 73.9, 64.1, 51.7, 49.5, 37.5 ppm. HRMS (ESI):  $m/z$  calcd for C<sub>27</sub>H<sub>20</sub>FN<sub>2</sub>O<sub>3</sub>S [M + H]<sup>+</sup> 471.1173, found 471.1176.

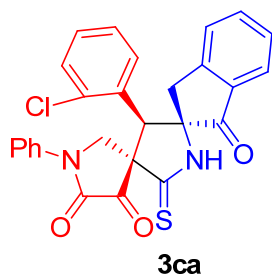

**(2R,3'S,4'S)-3'-(2-Chlorophenyl)-1''-phenyl-5'-thioxodispiro[indene-2,2'-pyrrolidine-4',3''-pyrrolidine]-1,4'',5''(3H)-trione (3ca).** **3ca** was obtained as a white solid (40.1 mg, 83% yield), m.p. 148–150 °C. HPLC (Daicel Chiralpak IA, *n*-hexane/2-propanol = 80:20, flow rate 1.0 mL/min, detection at 254 nm): major diastereoisomer,  $t_R = 46.8$  min (minor),  $t_R = 38.5$  min (major); minor diastereoisomer,  $t_R = 38.5$  min (major),  $t_R = 13.3$  min (minor); 13:1 dr, 94% *ee* for the major diastereoisomer.  $[\alpha]_D^{20} = -23.9$  (c 0.24, CH<sub>2</sub>Cl<sub>2</sub>). <sup>1</sup>H NMR (400 MHz, CDCl<sub>3</sub>):  $\delta$  9.10 (s, 1H, NH), 7.77 (d,  $J = 8.0$  Hz, 2H, ArH), 7.71 (d,  $J = 7.6$  Hz, 1H, ArH), 7.53–7.39 (m, 4H, ArH), 7.33–7.23 (m, 3H, ArH), 7.20–7.07 (m, 3H, ArH), 5.10 (s, 1H, CH), 4.98 (d,  $J = 11.2$  Hz, 1H, NCH<sub>2</sub>),

4.01 (d,  $J = 16.8$  Hz, 1H, CH<sub>2</sub>), 3.97 (d,  $J = 10.4$  Hz, 1H, NCH<sub>2</sub>), 3.61 (d,  $J = 18.0$  Hz, 1H, CH<sub>2</sub>) ppm; <sup>13</sup>C NMR (100 MHz, CDCl<sub>3</sub>):  $\delta$  202.0, 199.5, 196.2, 155.6, 150.6, 138.0, 136.7, 136.0, 133.6, 130.5, 130.3, 130.1, 129.3, 128.8, 128.2, 127.4, 127.2, 126.2, 124.8, 119.6, 74.6, 65.3, 52.25, 52.18, 37.0 ppm. HRMS (ESI):  $m/z$  calcd for C<sub>27</sub>H<sub>20</sub>ClN<sub>2</sub>O<sub>3</sub>S [M + H]<sup>+</sup> 487.0878, found 487.0872.

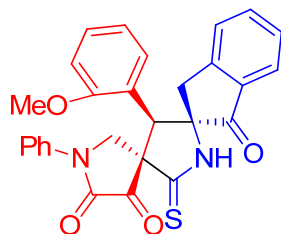

**3da**

**(2*R*,3'*R*,4'*S*)-3'-(2-Methoxyphenyl)-1''-phenyl-5'-thioxodispiro[indene-2,2'-pyrrolidine-4',3''-pyrrolidine]-1,4'',5''(3*H*)-trione (3da).** 3da was obtained as a light yellow solid (38.6 mg, 80% yield), m.p. 167–169 °C. HPLC (Daicel Chiralpak IB, *n*-hexane/2-propanol = 85:15, flow rate 1.0 mL/min, detection at 254 nm):  $t_R = 41.4$  min (minor),  $t_R = 30.7$  min (major), 90% *ee*. [ $\alpha$ ]<sub>D</sub><sup>20</sup> = –60.6 (c 0.17, CH<sub>2</sub>Cl<sub>2</sub>). <sup>1</sup>H NMR (400 MHz, CDCl<sub>3</sub>):  $\delta$  8.47 (s, 1H, NH), 7.86–7.83 (m, 2H, ArH), 7.76 (d,  $J = 7.6$  Hz, 1H, ArH), 7.54 (td,  $J_1 = 1.2$  Hz,  $J_2 = 7.2$  Hz, 1H, ArH), 7.45 (t,  $J = 8.0$  Hz, 2H, ArH), 7.37–7.25 (m, 3H, ArH), 7.16–7.12 (m, 1H, ArH), 6.81–6.78 (m, 2H, ArH), 6.56 (d,  $J = 8.0$  Hz, 1H, ArH), 4.88 (d,  $J = 10.4$  Hz, 1H, NCH<sub>2</sub>), 4.64 (s, 1H, CH), 4.00 (d,  $J = 10.8$  Hz, 1H, NCH<sub>2</sub>), 3.64 (d,  $J = 18.4$  Hz, 1H, CH<sub>2</sub>), 3.49 (d,  $J = 18.4$  Hz, 1H, CH<sub>2</sub>), 3.34 (s, 3H, OCH<sub>3</sub>) ppm; <sup>13</sup>C NMR (100 MHz, CDCl<sub>3</sub>):  $\delta$  201.8, 199.0, 194.9, 157.2, 156.4, 151.0, 138.3, 136.2, 134.3, 129.9, 129.3, 129.1, 127.9, 127.0, 126.5, 124.1, 120.9, 120.1, 119.8, 110.5, 73.9, 64.0, 54.1, 51.9, 51.5, 37.6 ppm; HRMS (ESI):  $m/z$  calcd for C<sub>28</sub>H<sub>23</sub>N<sub>2</sub>O<sub>4</sub>S [M + H]<sup>+</sup> 483.1373, found 483.1369.

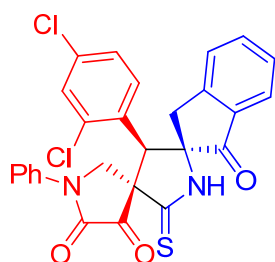

**3ea**

**(2*R*,3'*S*,4'*S*)-3'-(2,4-Dichlorophenyl)-1''-phenyl-5'-thioxodispiro[indene-2,2'-pyrrolidine-4',3''-pyrrolidine]-1,4'',5''(3*H*)-trione (3ea).** 3ea was obtained as a yellow solid (39.0 mg, 75% yield), m.p. 153–155 °C. HPLC (Daicel Chiralpak IA, *n*-hexane/2-propanol = 70:30, flow rate 1.0 mL/min, detection at 254 nm):  $t_R = 7.6$  min (minor),  $t_R = 25.1$  min (major); 89% *ee*. [ $\alpha$ ]<sub>D</sub><sup>20</sup> = –235.3 (c 0.34, CH<sub>2</sub>Cl<sub>2</sub>). <sup>1</sup>H NMR (400 MHz, CDCl<sub>3</sub>):  $\delta$  9.17 (s, 1H, NH), 7.78 (d,  $J = 8.0$  Hz, 2H, ArH), 7.71 (d,  $J = 7.6$  Hz, 1H, ArH), 7.56 (t,  $J = 7.4$  Hz, 1H, ArH), 7.44–7.41 (m, 3H, ArH), 7.36–7.27 (m, 3H, ArH), 7.19–7.17 (m, 2H, ArH), 5.04 (s, 1H, CH), 4.96 (d,  $J = 11.2$  Hz, 1H, NCH<sub>2</sub>), 3.97 (d,  $J = 10.4$  Hz, 1H, NCH<sub>2</sub>), 3.94 (d,  $J = 17.2$  Hz, 1H, CH<sub>2</sub>), 3.62 (d,  $J = 18.0$  Hz, 1H, CH<sub>2</sub>), ppm; <sup>13</sup>C NMR (100 MHz, CDCl<sub>3</sub>):  $\delta$  201.7, 199.4, 196.1, 155.5, 150.5, 138.0, 137.0, 136.7, 135.7, 133.4, 131.1,

130.3, 129.3, 128.5, 127.8, 127.5, 127.3, 126.3, 124.9, 119.6, 74.5, 65.3, 52.3, 51.6, 37.0 ppm. HRMS (ESI):  $m/z$  calcd for  $C_{27}H_{19}Cl_2N_2O_3S$  [ $M + H$ ]<sup>+</sup> 521.0488, found 521.0488;

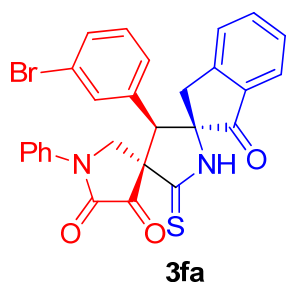

**(2R,3'R,4'S)-3'-(3-Bromophenyl)-1''-phenyl-5'-thioxodispiro[indene-2,2'-pyrrolidine-4',3''-pyrrolidine]-1,4'',5''(3H)-trione (3fa).** **3fa** was obtained as a light yellow solid (37.6 mg, 71% yield), m.p. 165–168 °C. HPLC (Daicel Chiralpak IA, *n*-hexane/2-propanol = 65:35, flow rate 1.0 mL/min, detection at 254 nm):  $t_R$  = 7.6 min (minor),  $t_R$  = 11.1 min (major); 83% *ee*.  $[\alpha]_D^{20}$  = –23.8 (*c* 0.14,  $CH_2Cl_2$ ). <sup>1</sup>H NMR (400 MHz,  $CDCl_3$ ):  $\delta$  9.14 (s, 1H, NH), 7.78 (d,  $J$  = 7.6 Hz, 2H, ArH), 7.70 (d,  $J$  = 7.6 Hz, 1H, ArH), 7.60 (t,  $J$  = 7.2 Hz, 1H, ArH), 7.45–7.26 (m, 6H, ArH), 7.09–6.97 (m, 3H, ArH), 4.90 (d,  $J$  = 10.8 Hz, 1H, NCH<sub>2</sub>), 4.35 (s, 1H, CH), 3.98 (d,  $J$  = 10.8 Hz, 1H, NCH<sub>2</sub>), 3.85 (d,  $J$  = 18.4 Hz, 1H, CH<sub>2</sub>), 3.67 (d,  $J$  = 18.4 Hz, 1H, CH<sub>2</sub>), ppm; <sup>13</sup>C NMR (100 MHz,  $CDCl_3$ ):  $\delta$  201.7, 198.8, 195.5, 155.7, 151.9, 138.0, 137.2, 133.7, 133.2, 132.9, 132.2, 130.8, 129.3, 128.4, 127.4, 127.3, 126.8, 124.8, 123.3, 119.7, 74.2, 64.3, 56.8, 51.4, 37.5 ppm. HRMS (ESI):  $m/z$  calcd for  $C_{27}H_{20}^{79}BrN_2O_3S$  [ $M + H$ ]<sup>+</sup> 531.0373, found 531.0385; calcd for  $C_{27}H_{20}^{81}BrN_2O_3S$  [ $M + H$ ]<sup>+</sup> 533.0353, found 533.0366.

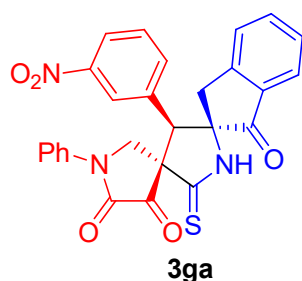

**(2R,3'R,4'S)-3'-(3-Nitrophenyl)-1''-phenyl-5'-thioxodispiro[indene-2,2'-pyrrolidine-4',3''-pyrrolidine]-1,4'',5''(3H)-trione (3ga).** **3ga** was obtained as a light yellow solid (29.9 mg, 60% yield), m.p. 169–171 °C. HPLC (Daicel Chiralpak IA, *n*-hexane/2-propanol = 70:30, flow rate 1.0 mL/min, detection at 254 nm):  $t_R$  = 13.0 min (minor),  $t_R$  = 18.5 min (major); 77% *ee*.  $[\alpha]_D^{20}$  = –55.0 (*c* 0.18,  $CH_2Cl_2$ ). <sup>1</sup>H NMR (400 MHz,  $CDCl_3$ ):  $\delta$  8.80 (s, 1H, NH), 8.07–8.04 (m, 1H, ArH), 7.83–7.74 (m, 4H, ArH), 7.63–7.59 (m, 1H, ArH), 7.46–7.30 (m, 7H, ArH), 4.94 (d,  $J$  = 10.8 Hz, 1H, NCH<sub>2</sub>), 4.51 (s, 1H, CH), 4.02 (d,  $J$  = 11.2 Hz, 1H, NCH<sub>2</sub>), 3.82 (d,  $J$  = 18.4 Hz, 1H, CH<sub>2</sub>), 3.71 (d,  $J$  = 18.8 Hz, 1H, CH<sub>2</sub>) ppm; <sup>13</sup>C NMR (100 MHz,  $CDCl_3$ ):  $\delta$  201.3, 198.4, 195.3, 155.6, 151.5, 148.4, 137.9, 137.5, 134.5, 133.6, 133.2, 130.6, 129.4, 128.7, 127.4, 126.7, 125.1, 124.9, 124.0, 119.7, 74.0, 64.4, 56.5, 51.6, 37.5 ppm. HRMS (ESI):  $m/z$  calcd for  $C_{27}H_{20}N_3O_5S$  [ $M + H$ ]<sup>+</sup> 498.1118, found 498.1119.

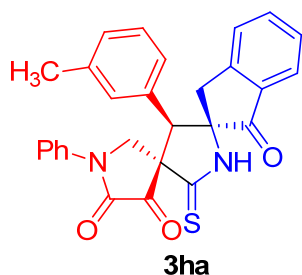

**(2*R*,3'*R*,4'*S*)-1''-Phenyl-5'-thioxo-3'-(*m*-tolyl)dispiro[indene-2,2'-pyrrolidine-4',3''-pyrrolidine]-1,4'',5''(3*H*)-trione (3ha).** **3ha** was obtained as a light yellow solid (43.3 mg, 93% yield), m.p. 154–156 °C. HPLC (Daicel Chiralpak IA, *n*-hexane/2-propanol = 70:30, flow rate 1.0 mL/min, detection at 254 nm):  $t_R$  = 8.2 min (minor),  $t_R$  = 12.0 min (major); 91% *ee*.  $[\alpha]_D^{20}$  = –111.1 (*c* 0.64, CH<sub>2</sub>Cl<sub>2</sub>). <sup>1</sup>H NMR (400 MHz, CDCl<sub>3</sub>): δ 9.16 (s, 1H, NH), 7.78 (d, *J* = 8.0 Hz, 2H, ArH), 7.69 (d, *J* = 7.6 Hz, 1H, ArH), 7.58 (t, *J* = 7.6 Hz, 1H, ArH), 7.44–7.26 (m, 5H, ArH), 7.04 (t, *J* = 7.6 Hz, 1H, ArH), 6.96 (d, *J* = 7.6 Hz, 1H, ArH), 6.77 (d, *J* = 8.0 Hz, 1H, ArH), 6.71 (s, 1H, ArH), 4.91 (d, *J* = 10.8 Hz, 1H, NCH<sub>2</sub>), 4.38 (s, 1H, CH), 3.99 (d, *J* = 10.8 Hz, 1H, NCH<sub>2</sub>), 3.86 (d, *J* = 18.4 Hz, 1H, CH<sub>2</sub>), 3.66 (d, *J* = 18.8 Hz, 1H, CH<sub>2</sub>), 2.12 (s, 3H, CH<sub>3</sub>) ppm; <sup>13</sup>C NMR (100 MHz, CDCl<sub>3</sub>): δ 202.2, 199.3, 195.8, 155.9, 152.3, 139.1, 138.2, 137.0, 133.9, 130.7, 130.2, 129.7, 129.2, 129.1, 128.1, 127.1, 126.7, 126.0, 124.6, 119.6, 74.2, 64.3, 57.8, 51.5, 37.4, 21.2 ppm. HRMS (ESI): *m/z* calcd for C<sub>28</sub>H<sub>23</sub>N<sub>2</sub>O<sub>3</sub>S [M + H]<sup>+</sup> 467.1424, found 467.1422.

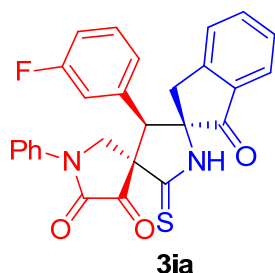

**(2*R*,3'*R*,4'*S*)-3'-(3-Fluorophenyl)-1''-phenyl-5'-thioxodispiro[indene-2,2'-pyrrolidine-4',3''-pyrrolidine]-1,4'',5''(3*H*)-trione (3ia).** **3ia** was obtained as a white solid (35.3 mg, 75% yield), m.p. 225–227 °C. HPLC (Daicel Chiralpak IA, *n*-hexane/2-propanol = 70:30, flow rate 1.0 mL/min, detection at 254 nm):  $t_R$  = 9.2 min (minor),  $t_R$  = 14.5 min (major); 89% *ee*.  $[\alpha]_D^{20}$  = –57.3 (*c* 0.4, CH<sub>2</sub>Cl<sub>2</sub>). <sup>1</sup>H NMR (400 MHz, CDCl<sub>3</sub>): δ 8.90 (s, 1H, NH), 7.80 (d, *J* = 8.0 Hz, 2H, ArH), 7.71 (d, *J* = 8.0 Hz, 1H, ArH), 7.61 (t, *J* = 7.2 Hz, 1H, ArH), 7.46–7.28 (m, 5H, ArH), 7.19–7.13 (m, 1H, ArH), 6.89 (td, *J*<sub>1</sub> = 8.4 Hz, *J*<sub>2</sub> = 2.0 Hz, 1H, ArH), 6.78 (d, *J* = 7.6 Hz, 1H, ArH), 6.70–6.67 (m, 1H, ArH), 4.91 (d, *J* = 10.8 Hz, 1H, NCH<sub>2</sub>), 4.40 (s, 1H, CH), 3.99 (d, *J* = 10.8 Hz, 1H, NCH<sub>2</sub>), 3.87 (d, *J* = 18.4 Hz, 1H, CH<sub>2</sub>), 3.68 (d, *J* = 18.8 Hz, 1H, CH<sub>2</sub>) ppm; <sup>13</sup>C NMR (100 MHz, CDCl<sub>3</sub>): δ 201.7, 198.8, 195.5, 162.7 (<sup>1</sup>*J*<sub>C-F</sub> = 247.7 Hz), 155.7, 152.0, 138.1, 137.2, 133.7, 133.3 (<sup>3</sup>*J*<sub>C-F</sub> = 7.1 Hz), 133.2, 131.0 (<sup>3</sup>*J*<sub>C-F</sub> = 8.3 Hz), 129.3, 128.4, 127.3, 126.8, 124.84, 124.79, 119.7, 116.7 (<sup>2</sup>*J*<sub>C-F</sub> = 22.4 Hz), 116.2 (<sup>2</sup>*J*<sub>C-F</sub> = 20.8 Hz), 74.0, 64.3, 56.8, 51.4, 37.5 ppm. HRMS (ESI): *m/z* calcd for C<sub>27</sub>H<sub>20</sub>FN<sub>2</sub>O<sub>3</sub>S [M + H]<sup>+</sup> 471.1173, found 471.1181.

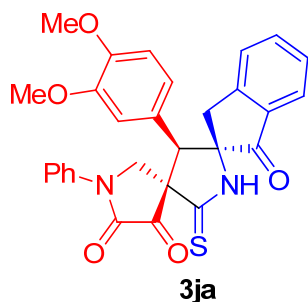

**(2R,3'R,4'S)-3'-(3,4-Dimethoxyphenyl)-1''-phenyl-5'-thioxodispiro[indene-2,2'-pyrrolidine-4',3''-pyrrolidine]-1,4'',5''(3H)-trione (3ja).** **3ja** was obtained as a light yellow solid (41.5 mg, 81% yield), m.p. 152–154 °C. HPLC (Daicel Chiralpak IA, *n*-hexane/2-propanol = 65:35, flow rate 1.0 mL/min, detection at 254 nm):  $t_R$  = 8.7 min (minor),  $t_R$  = 17.3 min (major); 91% *ee*.  $[\alpha]_D^{20}$  = –111.3 (*c* 0.68, CH<sub>2</sub>Cl<sub>2</sub>). <sup>1</sup>H NMR (400 MHz, CDCl<sub>3</sub>): δ 9.15 (s, 1H, NH), 7.79 (d, *J* = 8.0 Hz, 2H, ArH), 7.68 (d, *J* = 8.0 Hz, 1H, ArH), 7.57 (t, *J* = 7.6 Hz, 1H, ArH), 7.43 (t, *J* = 7.8 Hz, 2H, ArH), 7.37–7.27 (m, 3H, ArH), 6.60 (d, *J* = 8.4 Hz, 1H, ArH), 6.48 (dd, *J*<sub>1</sub> = 2.0 Hz, *J*<sub>2</sub> = 8.4 Hz, 1H, ArH), 6.33 (d, *J* = 2.0 Hz, 1H, ArH), 4.94 (d, *J* = 10.8 Hz, 1H, NCH<sub>2</sub>), 4.35 (s, 1H, CH), 4.00 (d, *J* = 10.8 Hz, 1H, NCH<sub>2</sub>), 3.85 (d, *J* = 18.4 Hz, 1H, CH<sub>2</sub>), 3.72 (s, 3H, OCH<sub>3</sub>), 3.64 (d, *J* = 18.4 Hz, 1H, CH<sub>2</sub>), 3.56 (s, 3H, OCH<sub>3</sub>) ppm; <sup>13</sup>C NMR (100 MHz, CDCl<sub>3</sub>): δ 202.6, 199.2, 196.1, 155.9, 152.4, 149.1, 149.0, 138.1, 137.0, 133.9, 129.3, 128.2, 127.2, 126.8, 124.5, 122.9, 121.5, 119.6, 111.8, 111.3, 74.1, 64.2, 58.0, 55.7, 55.6, 51.5, 37.4 ppm. HRMS (ESI): *m/z* calcd for C<sub>29</sub>H<sub>25</sub>N<sub>2</sub>O<sub>5</sub>S [M + H]<sup>+</sup> 513.1479, found 513.1478.

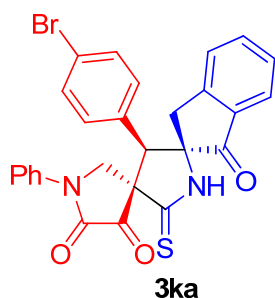

**(2R,3'R,4'S)-3'-(4-Bromophenyl)-1''-phenyl-5'-thioxodispiro[indene-2,2'-pyrrolidine-4',3''-pyrrolidine]-1,4'',5''(3H)-trione (3ka).** **3ka** was obtained as a white solid (45.0 mg, 85% yield), m.p. 165–167 °C. HPLC (Daicel Chiralpak IA, *n*-hexane/2-propanol = 70:30, flow rate 1.0 mL/min, detection at 254 nm):  $t_R$  = 12.4 min (minor),  $t_R$  = 28.9 min (major); 80% *ee*.  $[\alpha]_D^{20}$  = –70.8 (*c* 0.48, CH<sub>2</sub>Cl<sub>2</sub>). <sup>1</sup>H NMR (400 MHz, CDCl<sub>3</sub>): δ 9.08 (s, 1H, NH), 7.78 (d, *J* = 7.6, 2H, ArH), 7.68 (d, *J* = 8.0 Hz, 1H, ArH), 7.61 (t, *J* = 7.2 Hz, 1H, ArH), 7.45–7.27 (m, 7H, ArH), 6.85 (d, *J* = 8.8 Hz, 2H, ArH), 4.91 (d, *J* = 10.8 Hz, 1H, NCH<sub>2</sub>), 4.37 (s, 1H, CH), 3.96 (d, *J* = 10.8 Hz, 1H, NCH<sub>2</sub>), 3.82 (d, *J* = 18.4 Hz, 1H, CH<sub>2</sub>), 3.67 (d, *J* = 18.4 Hz, 1H, CH<sub>2</sub>), ppm; <sup>13</sup>C NMR (100 MHz, CDCl<sub>3</sub>): δ 201.9, 198.8, 195.7, 155.7, 152.0, 138.0, 137.3, 133.7, 132.5, 130.9, 129.9, 129.3, 128.4, 127.3, 126.8, 124.7, 123.4, 119.6, 74.0, 64.3, 56.9, 51.4, 37.4 ppm. HRMS (ESI): *m/z* calcd for C<sub>27</sub>H<sub>20</sub><sup>79</sup>BrN<sub>2</sub>O<sub>3</sub>S [M + H]<sup>+</sup> 531.0373, found 531.0375; calcd for C<sub>27</sub>H<sub>20</sub><sup>81</sup>BrN<sub>2</sub>O<sub>3</sub>S [M + H]<sup>+</sup>



533.0353, found 533.0359.

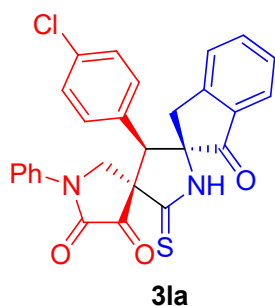

**(2R,3'R,4'S)-3'-(4-Chlorophenyl)-1''-phenyl-5'-thioxodispiro[indene-2,2'-pyrrolidine-4',3''-pyrrolidine]-1,4'',5''(3H)-trione (3la).** 3la was obtained as a light yellow solid (44.2 mg, 91% yield), m.p. 157–159 °C. HPLC (Daicel Chiralpak IA, *n*-hexane/2-propanol = 70:30, flow rate 1.0 mL/min, detection at 254 nm):  $t_R = 11.8$  min (minor),  $t_R = 27.2$  min (major); 89% *ee*.  $[\alpha]_D^{20} = -92.4$  (*c* 0.6, CH<sub>2</sub>Cl<sub>2</sub>). <sup>1</sup>H NMR (400 MHz, CDCl<sub>3</sub>):  $\delta$  9.14 (s, 1H, NH), 7.78 (d, *J* = 8.0, 1H, ArH), 7.67 (d, *J* = 7.6 Hz, 1H, ArH), 7.60 (t, *J* = 8.0 Hz, 1H, ArH), 7.45–7.28 (m, 6H, ArH), 7.13 (d, *J* = 8.4 Hz, 2H, ArH), 6.92 (d, *J* = 8.8 Hz, 2H, ArH), 4.91 (d, *J* = 10.8 Hz, 1H, NCH<sub>2</sub>), 4.38 (s, 1H, CH), 3.96 (d, *J* = 10.8 Hz, 1H, NCH<sub>2</sub>), 3.83 (d, *J* = 18.4 Hz, 1H, CH<sub>2</sub>), 3.66 (d, *J* = 18.4 Hz, 1H, CH<sub>2</sub>) ppm; <sup>13</sup>C NMR (100 MHz, CDCl<sub>3</sub>):  $\delta$  202.0, 198.8, 195.7, 155.7, 152.0, 138.0, 137.2, 135.2, 133.7, 130.6, 129.5, 129.3, 128.3, 127.3, 126.8, 124.7, 119.6, 74.1, 64.3, 56.9, 51.4, 37.4 ppm. HRMS (ESI): *m/z* calcd for C<sub>27</sub>H<sub>20</sub>ClN<sub>2</sub>O<sub>3</sub>S [M + H]<sup>+</sup> 487.0878, found 487.0870.

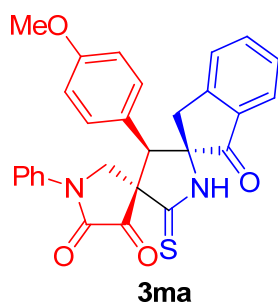

**(2R,3'R,4'S)-3'-(4-Methoxyphenyl)-1''-phenyl-5'-thioxodispiro[indene-2,2'-pyrrolidine-4',3''-pyrrolidine]-1,4'',5''(3H)-trione (3ma).** 3ma was obtained as a white solid (46.3 mg, 96% yield), m.p. 161–163 °C. HPLC (Daicel Chiralpak IA, *n*-hexane/2-propanol = 70:30, flow rate 1.0 mL/min, detection at 254 nm):  $t_R = 10.7$  min (minor),  $t_R = 27.4$  min (major); 91% *ee*.  $[\alpha]_D^{20} = -78.4$  (*c* 0.6, CH<sub>2</sub>Cl<sub>2</sub>). <sup>1</sup>H NMR (400 MHz, CDCl<sub>3</sub>):  $\delta$  9.10 (s, 1H, NH), 7.77 (d, *J* = 8.0 Hz, 2H, ArH), 7.66 (d, *J* = 7.6 Hz, 1H, ArH), 7.57 (t, *J* = 7.2 Hz, 1H, ArH), 7.44–7.28 (m, 5H, ArH), 6.90 (d, *J* = 8.4 Hz, 2H, ArH), 6.65 (d, *J* = 8.4 Hz, 2H, ArH), 4.91 (d, *J* = 10.8 Hz, 1H, NCH<sub>2</sub>), 4.34 (s, 1H, CH), 3.97 (d, *J* = 10.4 Hz, 1H, NCH<sub>2</sub>), 3.89 (d, *J* = 18.4, 1H, CH<sub>2</sub>), 3.65 (d, *J* = 18.0 Hz, 1H, CH<sub>2</sub>), 3.66 (s, 3H, OCH<sub>3</sub>) ppm; <sup>13</sup>C NMR (100 MHz, CDCl<sub>3</sub>):  $\delta$  202.3, 199.3, 159.7, 155.8, 152.3, 138.1, 137.0, 133.8, 130.6, 129.2, 128.1, 127.1, 126.7, 124.6, 122.4, 119.6, 114.6, 74.2, 64.5, 57.4, 55.2, 51.5, 37.3 ppm. HRMS (ESI): *m/z* calcd for C<sub>28</sub>H<sub>23</sub>N<sub>2</sub>O<sub>4</sub>S [M + H]<sup>+</sup> 483.1373, found 483.1371.

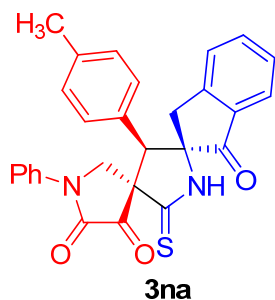

**(2R,3'R,4'S)-1''-Phenyl-5'-thioxo-3'-(*p*-tolyl)dispiro[indene-2,2'-pyrrolidine-4',3''-**

**pyrrolidine]-1,4'',5''(3H)-trione (3na).** 3na was obtained as a light yellow solid (46.5 mg, >99% yield), m.p. 167–169 °C. HPLC (Daicel Chiralpak IA, *n*-hexane/2-propanol = 70:30, flow rate 1.0 mL/min, detection at 254 nm):  $t_R$  = 10.6 min (minor),  $t_R$  = 20.9 min (major); 91% ee.  $[\alpha]_D^{20}$  = –133.8 (c 0.6, CH<sub>2</sub>Cl<sub>2</sub>). <sup>1</sup>H NMR (400 MHz, CDCl<sub>3</sub>): δ 9.25 (s, 1H, NH), 7.77 (d, *J* = 8.0 Hz, 2H, ArH), 7.66 (d, *J* = 7.6 Hz, 1H, ArH), 7.57 (t, *J* = 7.4 Hz, 1H, ArH), 7.43–7.28 (m, 5H, ArH), 6.93 (d, *J* = 8.0 Hz, 2H, ArH), 6.84 (d, *J* = 8.0 Hz, 2H, ArH), 4.90 (d, *J* = 10.8 Hz, 1H, NCH<sub>2</sub>), 4.39 (s, 1H, CH), 3.98 (d, *J* = 10.4 Hz, 1H, NCH<sub>2</sub>), 3.86 (d, *J* = 18.4 Hz, 1H, CH<sub>2</sub>), 3.65 (d, *J* = 18.4 Hz, 1H, CH<sub>2</sub>), 2.17 (s, 3H, CH<sub>3</sub>) ppm; <sup>13</sup>C NMR (100 MHz, CDCl<sub>3</sub>): δ 202.2, 199.2, 195.9, 155.9, 152.3, 138.8, 138.1, 136.9, 133.8, 129.9, 129.2, 129.1, 128.1, 127.7, 127.1, 126.7, 124.6, 119.6, 74.2, 64.4, 57.5, 51.4, 37.3, 20.8 ppm. HRMS (ESI): *m/z* calcd for C<sub>28</sub>H<sub>23</sub>N<sub>2</sub>O<sub>3</sub>S [M + H]<sup>+</sup> 467.1424, found 467.1415.

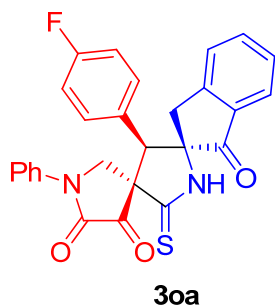

**(2R,3'R,4'S)-3'-(4-Fluorophenyl)-1''-phenyl-5'-thioxodispiro[indene-2,2'-pyrrolidine-4',3''-**

**pyrrolidine]-1,4'',5''(3H)-trione (3oa).** 3oa was obtained as a light yellow solid (38.1 mg, 81% yield), m.p. 154–156 °C. HPLC (Daicel Chiralpak IC, *n*-hexane/2-propanol = 70:30, flow rate 1.0 mL/min, detection at 254 nm):  $t_R$  = 10.8 min (minor),  $t_R$  = 22.2 min (major); 86% ee.  $[\alpha]_D^{20}$  = –22.9 (c 0.34, CH<sub>2</sub>Cl<sub>2</sub>). <sup>1</sup>H NMR (400 MHz, CDCl<sub>3</sub>): δ 8.99 (s, 1H, NH), 7.78 (d, *J* = 8.0 Hz, 2H, ArH), 7.69 (d, *J* = 7.6 Hz, 1H, ArH), 7.60 (t, *J* = 7.4 Hz, 1H, ArH), 7.45–7.28 (m, 5H, ArH), 6.99–6.96 (m, 2H, ArH), 6.84 (t, *J* = 8.4 Hz, 2H, ArH), 4.92 (d, *J* = 10.8 Hz, 1H, NCH<sub>2</sub>), 4.37 (s, 1H, CH), 3.96 (d, *J* = 10.4 Hz, 1H, NCH<sub>2</sub>), 3.86 (d, *J* = 18.4 Hz, 1H, CH<sub>2</sub>), 3.67 (d, *J* = 18.4 Hz, 1H, CH<sub>2</sub>) ppm; <sup>13</sup>C NMR (100 MHz, CDCl<sub>3</sub>): δ 202.0, 199.0, 195.8, 162.7 (<sup>1</sup>*J*<sub>C-F</sub> = 248.6 Hz), 155.7, 152.0, 138.1, 137.2, 133.7, 131.2 (<sup>3</sup>*J*<sub>C-F</sub> = 8.2 Hz), 129.3, 128.3, 127.3, 126.7, 126.6 (<sup>4</sup>*J*<sub>C-F</sub> = 3.3 Hz), 124.7, 119.6, 116.4 (<sup>2</sup>*J*<sub>C-F</sub> = 21.4 Hz), 74.2, 64.4, 57.0, 51.5, 37.3 ppm. HRMS (ESI): *m/z* calcd for C<sub>27</sub>H<sub>20</sub>FN<sub>2</sub>O<sub>3</sub>S [M + H]<sup>+</sup> 471.1173, found 471.1165.

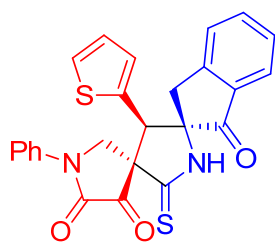

**3pa**

**(2R,3'R,4'S)-1''-Phenyl-3'-(thiophen-2-yl)-5'-thioxodispiro[indene-2,2'-pyrrolidine-4',3''-pyrrolidine]-1,4'',5''(3H)-trione (3pa).** **3pa** was obtained as a white solid (32.5 mg, 71% yield), m.p. 250–252 °C. HPLC (Daicel Chiralpak IA, *n*-hexane/2-propanol = 60:40, flow rate 1.0 mL/min, detection at 254 nm):  $t_R$  = 12.6 min (major),  $t_R$  = 21.3 min (minor); >99% *ee*.  $[\alpha]_D^{20}$  = –26.1 (*c* 0.22, CH<sub>2</sub>Cl<sub>2</sub>). <sup>1</sup>H NMR (400 MHz, CDCl<sub>3</sub>): δ 8.90 (s, 1H, NH), 7.80 (d, *J* = 8.0 Hz, 2H, ArH), 7.70 (d, *J* = 7.6 Hz, 1H, ArH), 7.62 (t, *J* = 7.4 Hz, 1H, ArH), 7.46–7.28 (m, 5H, ArH), 7.09 (d, *J* = 4.8 Hz, 1H, ArH), 6.78 (t, *J* = 4.4 Hz, 1H, ArH), 6.71 (d, *J* = 3.3 Hz, 1H, ArH), 4.95 (d, *J* = 10.8 Hz, 1H, NCH<sub>2</sub>), 4.63 (s, 1H, CH), 4.10 (d, *J* = 18.4 Hz, 1H, CH<sub>2</sub>), 4.03 (d, *J* = 10.8 Hz, 1H, NCH<sub>2</sub>), 3.66 (d, *J* = 18.4 Hz, 1H, CH<sub>2</sub>) ppm; <sup>13</sup>C NMR (100 MHz, CDCl<sub>3</sub>): δ 201.9, 198.6, 195.0, 155.6, 152.3, 138.1, 137.1, 133.8, 131.9, 129.3, 129.0, 128.3, 127.5, 127.2, 126.8, 124.8, 119.6, 74.0, 64.5, 53.2, 51.5, 38.0 ppm. HRMS (ESI): *m/z* calcd for C<sub>25</sub>H<sub>19</sub>N<sub>2</sub>O<sub>3</sub>S<sub>2</sub> [M + H]<sup>+</sup> 459.0832, found 459.0854;

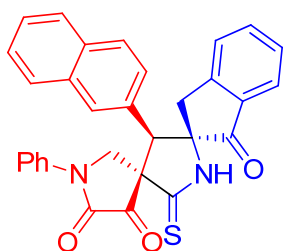

**3qa**

**(2R,3'R,4'S)-3'-(Naphthalen-2-yl)-1''-phenyl-5'-thioxodispiro[indene-2,2'-pyrrolidine-4',3''-pyrrolidine]-1,4'',5''(3H)-trione (3qa).** **3qa** was obtained as a light yellow solid (46.2 mg, 92% yield), m.p. 165–167 °C. HPLC (Daicel Chiralpak IA, *n*-hexane/ethyl acetate = 70:30, flow rate 1.0 mL/min, detection at 254 nm):  $t_R$  = 10.8 min (minor),  $t_R$  = 19.3 min (major); 94% *ee*.  $[\alpha]_D^{20}$  = –68.6 (*c* 0.8, CH<sub>2</sub>Cl<sub>2</sub>). <sup>1</sup>H NMR (400 MHz, CDCl<sub>3</sub>): δ 9.22 (s, 1H, NH), 7.75 (d, *J* = 8.0 Hz, 2H, ArH), 7.69–7.62 (m, 4H, ArH), 7.52–7.36 (m, 6H, ArH), 7.32–7.23 (m, 3H, ArH), 7.06 (d, *J* = 8.4 Hz, 1H, ArH), 4.94 (d, *J* = 10.8 Hz, 1H, NCH<sub>2</sub>), 4.63 (s, 1H, CH), 4.05 (d, *J* = 10.8 Hz, 1H, NCH<sub>2</sub>), 3.93 (d, *J* = 18.4 Hz, 1H, CH<sub>2</sub>), 3.73 (d, *J* = 18.4 Hz, 1H, CH<sub>2</sub>) ppm; <sup>13</sup>C NMR (100 MHz, CDCl<sub>3</sub>): δ 202.1, 199.2, 195.9, 155.9, 152.3, 138.1, 137.0, 133.7, 132.9, 132.8, 129.22, 129.17, 128.3, 128.2, 128.0, 127.4, 127.1, 126.9, 126.82, 126.76, 126.0, 124.7, 119.6, 74.3, 64.5, 57.8, 51.5, 37.5 ppm. HRMS (ESI): *m/z* calcd for C<sub>31</sub>H<sub>23</sub>N<sub>2</sub>O<sub>3</sub>S [M + H]<sup>+</sup> 503.1424, found 503.1426;

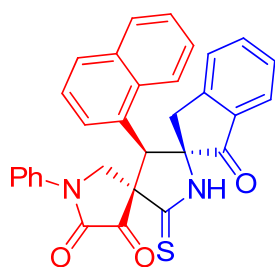

**3ra**

**(2R,3'R,4'S)-3'-(Naphthalen-1-yl)-1''-phenyl-5'-thioxodispiro[indene-2,2'-pyrrolidine-4',3''-pyrrolidine]-1,4'',5''(3H)-trione (3ra).** 3ra was obtained as a white solid (30.1 mg, 60% yield), m.p. 222–224 °C. HPLC (Daicel Chiralpak IC, *n*-hexane/2-propanol = 65:35, flow rate 1.0 mL/min, detection at 254 nm):  $t_R$  = 15.8 min (major),  $t_R$  = 40.5 min (minor); 75 % *ee*.  $[\alpha]_D^{20}$  = –92.0 (*c* 0.58, CH<sub>2</sub>Cl<sub>2</sub>). <sup>1</sup>H NMR (400 MHz, CDCl<sub>3</sub>): δ 9.72 (s, 1H, NH), 8.16 (d, *J* = 8.4 Hz, 1H, ArH), 7.70–7.63 (m, 4H, ArH), 7.55–7.49 (m, 2H, ArH), 7.40–7.29 (m, 6H, ArH), 7.22–7.15 (m, 2H, ArH), 7.02 (t, *J* = 7.4 Hz, 1H, ArH), 5.55 (s, 1H, CH), 5.06 (d, *J* = 10.8 Hz, 1H, NCH<sub>2</sub>), 4.19 (d, *J* = 18.0 Hz, 1H, CH<sub>2</sub>), 3.86 (d, *J* = 10.8 Hz, 1H, NCH<sub>2</sub>), 3.72 (d, *J* = 17.6 Hz, 1H, CH<sub>2</sub>) ppm; <sup>13</sup>C NMR (100 MHz, CDCl<sub>3</sub>): δ 203.5, 200.2, 197.1, 155.9, 151.2, 138.0, 136.7, 133.9, 133.8, 132.8, 129.8, 129.2, 129.0, 127.8, 127.3, 127.1, 127.0, 126.8, 126.1, 124.8, 124.4, 122.4, 119.5, 74.9, 65.4, 51.8, 51.5, 37.6 ppm. HRMS (ESI): *m/z* calcd for C<sub>31</sub>H<sub>23</sub>N<sub>2</sub>O<sub>3</sub>S [M + H]<sup>+</sup> 503.1424, found 503.1419;

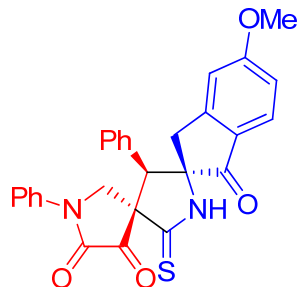

**3ab**

**(2R,3'R,4'S)-5-methoxy-1'',3'-diphenyl-5'-thioxodispiro[indene-2,2'-pyrrolidine-4',3''-pyrrolidine]-1,4'',5''(3H)-trione (3ab).** 3ab was obtained as a white solid (43.9 mg, 91% yield), m.p. 160–162 °C. HPLC (Daicel Chiralpak IA, *n*-hexane/2-propanol = 65:35, flow rate 1.0 mL/min, detection at 254 nm):  $t_R$  = 9.6 min (minor),  $t_R$  = 22.3 min (major); 93% *ee*.  $[\alpha]_D^{20}$  = –99.5 (*c* 0.7, CH<sub>2</sub>Cl<sub>2</sub>). <sup>1</sup>H NMR (400 MHz, CDCl<sub>3</sub>): δ 9.33 (s, 1H, NH), 7.79 (d, *J* = 7.6 Hz, 2H, ArH), 7.58 (d, *J* = 8.4 Hz, 1H, ArH), 7.42 (t, *J* = 8.0 Hz, 2H, ArH), 7.28 (t, *J* = 8.0 Hz, 1H, ArH), 7.18–7.14 (m, 3H, ArH), 6.95–6.93 (m, 2H, ArH), 6.82 (dd, *J*<sub>1</sub> = 2.0 Hz, *J*<sub>2</sub> = 8.8 Hz, 1H, ArH), 6.77 (s, 1H, ArH), 4.92 (d, *J* = 10.8 Hz, 1H, NCH<sub>2</sub>), 4.45 (s, 1H, CH), 4.00 (d, *J* = 10.8 Hz, 1H, NCH<sub>2</sub>), 3.83 (s, 3H, OCH<sub>3</sub>), 3.78 (d, *J* = 18.4 Hz, 1H, CH<sub>2</sub>), 3.61 (d, *J* = 18.4 Hz, 1H, CH<sub>2</sub>) ppm; <sup>13</sup>C NMR (100 MHz, CDCl<sub>3</sub>): δ 199.5, 199.0, 195.9, 167.1, 156.0, 155.8, 138.1, 131.1, 129.3, 129.2, 129.1, 128.7, 127.1, 127.0, 126.5, 119.6, 117.0, 109.2, 74.4, 64.3, 57.4, 55.8, 51.5, 37.5 ppm; HRMS (ESI): *m/z* calcd for C<sub>28</sub>H<sub>23</sub>N<sub>2</sub>O<sub>4</sub>S [M + H]<sup>+</sup> 483.1373, found 483.1365.

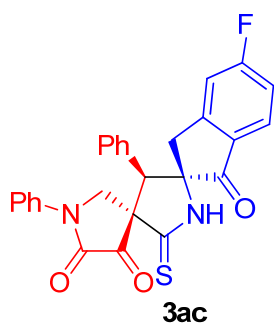

**(2*R*,3'*R*,4'*S*)-5-fluoro-1'',3'-diphenyl-5'-thioxodispiro[indene-2,2'-pyrrolidine-4',3''-pyrrolidine]-1,4'',5''(3*H*)-trione (3ac).** 3ac was obtained as a light yellow solid (44.2 mg, 94% yield), m.p. 156–158 °C. HPLC (Daicel Chiralpak IB, *n*-hexane/2-propanol = 85:15, flow rate 1.0 mL/min, detection at 254 nm):  $t_R$  = 24.9 min (major),  $t_R$  = 29.6 min (minor); 88% *ee*.  $[\alpha]_D^{20}$  = –55.7 (*c* 0.20, CH<sub>2</sub>Cl<sub>2</sub>). <sup>1</sup>H NMR (400 MHz, CDCl<sub>3</sub>): δ 8.84 (s, 1H, NH), 7.79–7.73 (m, 3H, ArH), 7.44 (t, *J* = 7.8 Hz, 2H, ArH), 7.30 (t, *J* = 7.4 Hz, 1H, ArH), 7.22–7.14 (m, 3H, ArH), 7.06–7.02 (m, 2H, ArH), 6.92 (d, *J* = 6.8 Hz, 2H, ArH), 4.90 (d, *J* = 10.8 Hz, 1H, NCH<sub>2</sub>), 4.38 (s, 1H, CH), 3.99 (d, *J* = 10.8 Hz, 1H, NCH<sub>2</sub>), 3.85 (d, *J* = 18.4 Hz, 1H, CH<sub>2</sub>), 3.65 (d, *J* = 18.8 Hz, 1H, CH<sub>2</sub>) ppm; <sup>13</sup>C NMR (100 MHz, DMSO-*d*<sub>6</sub>): δ 200.7, 198.0, 196.6, 167.3 (<sup>1</sup>*J*<sub>C-F</sub> = 254.6 Hz), 155.5, 155.1 (<sup>3</sup>*J*<sub>C-F</sub> = 11.0 Hz), 138.0, 131.5, 130.6, 129.2, 129.0, 128.44, 128.37, 127.0, 126.9, 119.2, 116.6 (<sup>2</sup>*J*<sub>C-F</sub> = 23.9 Hz), 113.5 (<sup>2</sup>*J*<sub>C-F</sub> = 22.8 Hz), 73.8, 64.5, 56.4, 51.1, 36.9 ppm; HRMS (ESI): *m/z* calcd for C<sub>27</sub>H<sub>20</sub>FN<sub>2</sub>O<sub>3</sub>S [M + H]<sup>+</sup> 471.1132, found 471.1174.

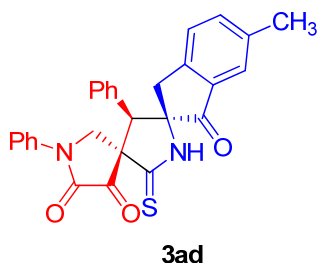

**(2*R*,3'*R*,4'*S*)-6-Methyl-1'',3'-diphenyl-5'-thioxodispiro[indene-2,2'-pyrrolidine-4',3''-pyrrolidine]-1,4'',5''(3*H*)-trione (3ad).** 3ad was obtained as a white solid (37.3 mg, 80% yield), m.p. 159–161 °C. HPLC (Daicel Chiralpak IA, *n*-hexane/2-propanol = 70:30, flow rate 1.0 mL/min, detection at 254 nm):  $t_R$  = 9.5 min (minor),  $t_R$  = 14.9 min (major); 86% *ee*.  $[\alpha]_D^{20}$  = –110.3 (*c* 0.5, CH<sub>2</sub>Cl<sub>2</sub>). <sup>1</sup>H NMR (400 MHz, CDCl<sub>3</sub>): δ 9.12 (s, 1H, NH), 7.79 (d, *J* = 8.0 Hz, 2H, ArH), 7.46–7.38 (m, 4H, ArH), 7.31–7.22 (m, 2H, ArH), 7.17–7.13 (m, 3H, ArH), 6.94 (d, *J* = 6.4 Hz, 2H, ArH), 4.93 (d, *J* = 10.8 Hz, 1H, NCH<sub>2</sub>), 4.46 (s, 1H, CH), 4.01 (d, *J* = 10.8 Hz, 1H, NCH<sub>2</sub>), 3.80 (d, *J* = 18.4 Hz, 1H, CH<sub>2</sub>), 3.60 (d, *J* = 18.4 Hz, 1H, CH<sub>2</sub>), 2.32 (s, 3H, CH<sub>3</sub>) ppm; <sup>13</sup>C NMR (100 MHz, CDCl<sub>3</sub>): δ 202.2, 199.1, 195.7, 155.9, 149.7, 138.4, 138.3, 138.2, 134.0, 131.0, 129.3, 129.1, 128.8, 127.1, 126.4, 124.4, 119.6, 74.4, 64.3, 57.7, 51.5, 37.1, 21.0 ppm. HRMS (ESI): *m/z* calcd for C<sub>28</sub>H<sub>23</sub>N<sub>2</sub>O<sub>3</sub>S [M + H]<sup>+</sup> 467.1424, found 467.1415.

## 5. Produce for the synthesis of compound 4 and 5

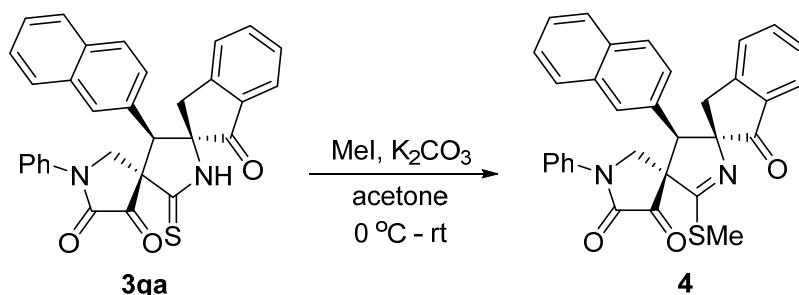

The corresponding chiral compound **3qa** (50 mg, 0.1 mmol) was dissolved in 5 mL acetone and lower the temperature to 0 °C, then potassium carbonate (1 equiv.) was added to the system. Methyl iodide (1.2 equiv.) solution in acetone was slowly added, and warm the solution to room temperature and stirred overnight. When the reaction was completed detected by TLC, the mixture was concentrated under vacuum, the crude product was purified by column chromatography (eluent: petroleum ether/ ethyl acetate = 5:1 to 2:1 v/v) to give the compound **4**.

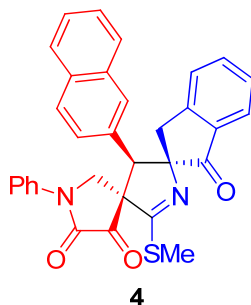

**(2R,3'R,4'S)-5'-(Methylthio)-3'-(naphthalen-2-yl)-1''-phenyl-3'H-dispiro[indene-2,2'-pyrrole-4',3''-pyrrolidine]-1,4'',5''(3H)-trione (4)**. **4** was obtained as a white solid (52.0 mg, >99 % yield), m.p. 273–275 °C. HPLC (Daicel Chiralpak IA, *n*-hexane/2-propanol = 70:30, flow rate 1.0 mL/min, detection at 254 nm):  $t_R$  = 12.8 min (minor),  $t_R$  = 14.8 min (major); 91% *ee*.  $[\alpha]_D^{20} = -38.7$  (*c* 0.31, CH<sub>2</sub>Cl<sub>2</sub>). <sup>1</sup>H NMR (400 MHz, CDCl<sub>3</sub>):  $\delta$  7.81 (t, *J* = 8.0 Hz, 3H, ArH), 7.72–7.66 (m, 3H, ArH), 7.55 (t, *J* = 7.2, 1H, ArH), 7.47 – 7.39 (m, 5H, ArH), 7.37–7.28 (m, 3H, ArH), 7.14 (dd, *J*<sub>1</sub> = 1.4 Hz, *J*<sub>2</sub> = 8.6 Hz, 1H, ArH), 4.60 (d, *J* = 11.2 Hz, 1H, NCH<sub>2</sub>), 4.57 (s, 1H, CH), 4.39 (d, *J* = 11.6 Hz, 1H, NCH<sub>2</sub>), 3.54 (d, *J* = 18.0 Hz, 1H, CH<sub>2</sub>), 3.46 (d, *J* = 18.0 Hz, 1H, CH<sub>2</sub>), 2.45 (s, 3H, SCH<sub>3</sub>) ppm; <sup>13</sup>C NMR (100 MHz, CDCl<sub>3</sub>):  $\delta$  204.3, 195.5, 171.7, 156.6, 153.4, 138.0, 136.0, 134.5, 133.0, 132.7, 130.6, 129.4, 128.9, 127.9, 127.7, 127.4, 127.2, 126.7, 126.61, 126.56, 124.8, 119.5, 85.2, 66.5, 60.1, 51.4, 37.8, 13.9 ppm. HRMS (ESI): *m/z* calcd for C<sub>32</sub>H<sub>25</sub>N<sub>2</sub>O<sub>3</sub>S [M + H]<sup>+</sup> 517.1580, found 517.1575.

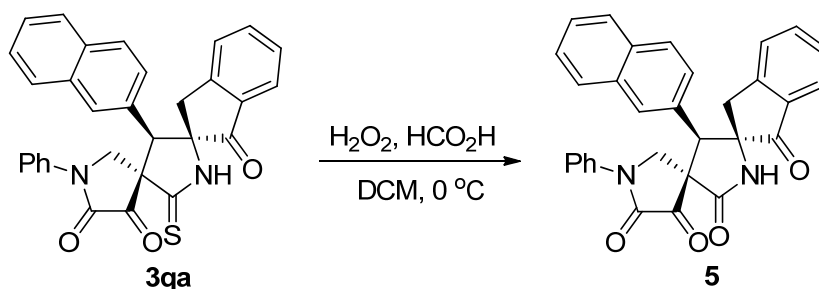

The corresponding chiral compound **3qa** (50 mg, 0.1 mmol) was dissolved in 5 mL DCM and lower the temperature to 0 °C, H<sub>2</sub>O<sub>2</sub> (0.5 mL, 30% wt%) was added slowly, after the addition, HCO<sub>2</sub>H (0.5 ml) was also added slowly to the reaction system. Monitoring the reaction by TLC, saturated sodium bicarbonate solution was added to quench the reaction at 0 °C when the reaction completed. The aqueous phase was extracted with DCM, and the organic phase was combined. The reaction mixture was concentrated under vacuum, and the crude product was purified by column chromatography (eluent: petroleum ether/ethyl acetate = 3:1–2:1 v/v) to give the compound **5**.

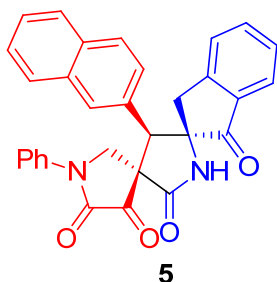

**(2*R*,3'*R*,4'*S*)-3'-(naphthalen-2-yl)-1''-phenyldispiro[indene-2,2'-pyrrolidine-4',3''-pyrrolidine]-1,4'',5'',5''(3*H*)-tetraone (5).**

**5** was obtained as a white solid (41.4 mg, 85 % yield), m.p. 189–190 °C. HPLC (Daicel Chiralpak IA, *n*-hexane/2-propanol = 70:30, flow rate 1.0 mL/min, detection at 254 nm): *t*<sub>R</sub> = 23.4 min (minor), *t*<sub>R</sub> = 28.0 min (major); 86% *ee*. [α]<sub>D</sub><sup>20</sup> = -73.0 (*c* 0.83, CH<sub>2</sub>Cl<sub>2</sub>). <sup>1</sup>H NMR (400 MHz, CDCl<sub>3</sub>): δ 7.74 (d, *J* = 8.0 Hz, 2H, ArH), 7.70–7.63 (m, 3H, ArH), 7.58 (d, *J* = 8.4, 1H, ArH), 7.47–7.39 (m, 5H, ArH+NH), 7.35 (t, *J* = 8.0 Hz, 2H, ArH), 7.27–7.21 (m, 3H, ArH), 7.02 (dd, *J*<sub>1</sub> = 1.4 Hz, *J*<sub>2</sub> = 8.6 Hz, 1H, ArH), 4.71 (d, *J* = 10.8 Hz, 1H, NCH<sub>2</sub>), 4.49 (s, 1H, CH), 4.01 (d, *J* = 10.8 Hz, 1H, NCH<sub>2</sub>), 3.94 (d, *J* = 18.4 Hz, 1H, CH<sub>2</sub>), 3.60 (d, *J* = 18.4 Hz, 1H, CH<sub>2</sub>) ppm; <sup>13</sup>C NMR (100 MHz, CDCl<sub>3</sub>): δ 204.1, 196.9, 170.8, 156.3, 152.4, 138.1, 136.8, 134.0, 132.9, 132.8, 129.2, 129.0, 128.84, 128.77, 128.0, 127.4, 127.1, 126.8, 126.7, 126.6, 125.9, 124.4, 119.3, 68.7, 57.8, 56.9, 49.2, 38.0 ppm. HRMS (ESI): *m/z* calcd for C<sub>31</sub>H<sub>23</sub>N<sub>2</sub>O<sub>4</sub> [M + H]<sup>+</sup> 487.1652, found 487.1653.

## 6. References

1. X. Chen, L. Zhu, L. Fang, S. Yan and J. Lin, RSC Adv. **2014**, 4, 9926.
2. Zhao, B.-L. and Du, D.-M. *Org. Lett.* **2018**, 20, 3797.

## 7. Copies of $^1\text{H}$ and $^{13}\text{C}$ NMR spectra of new products

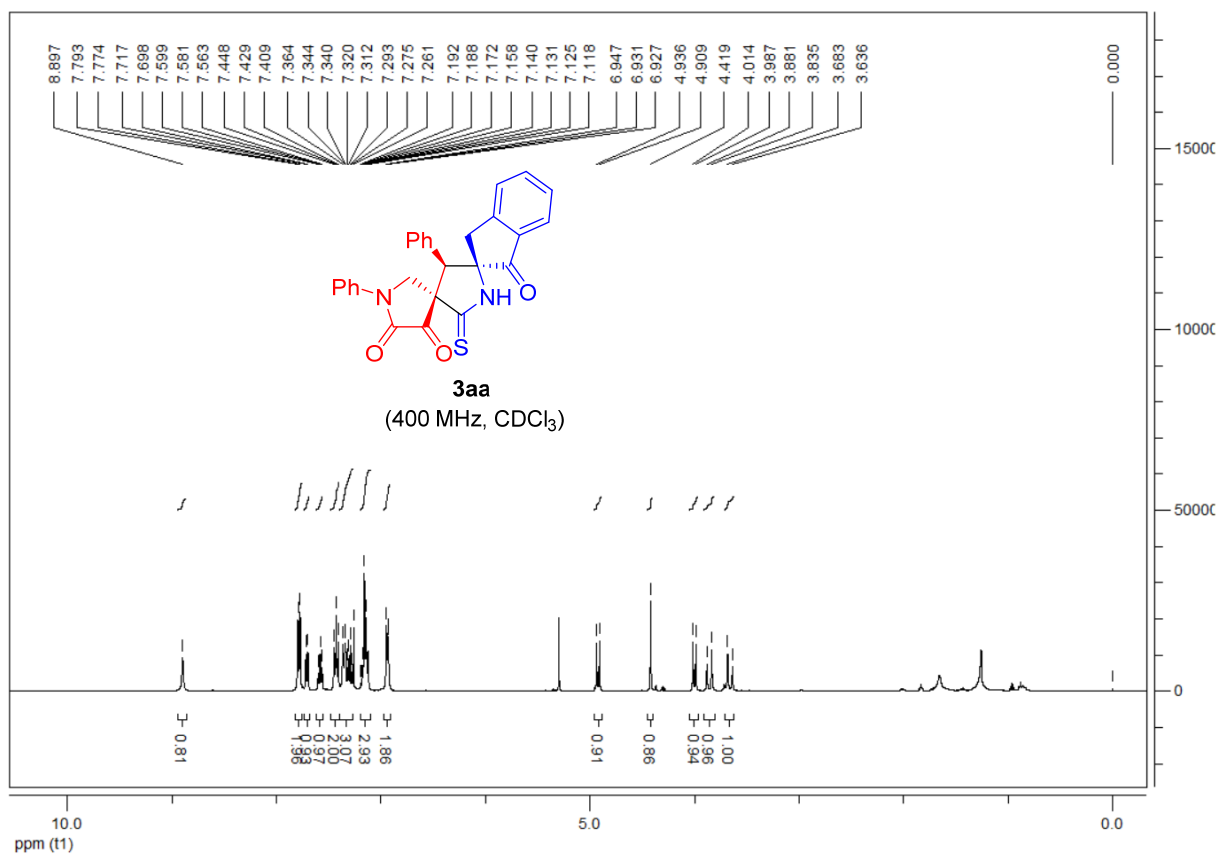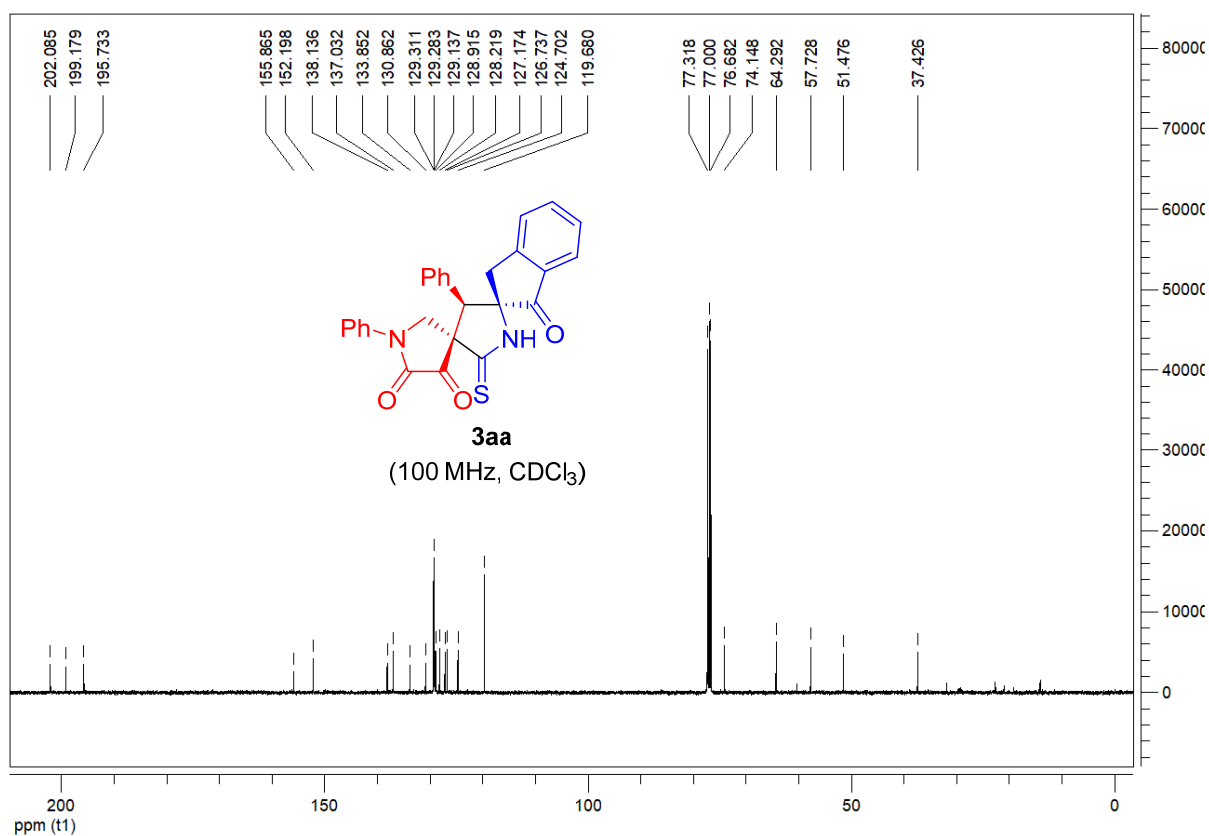



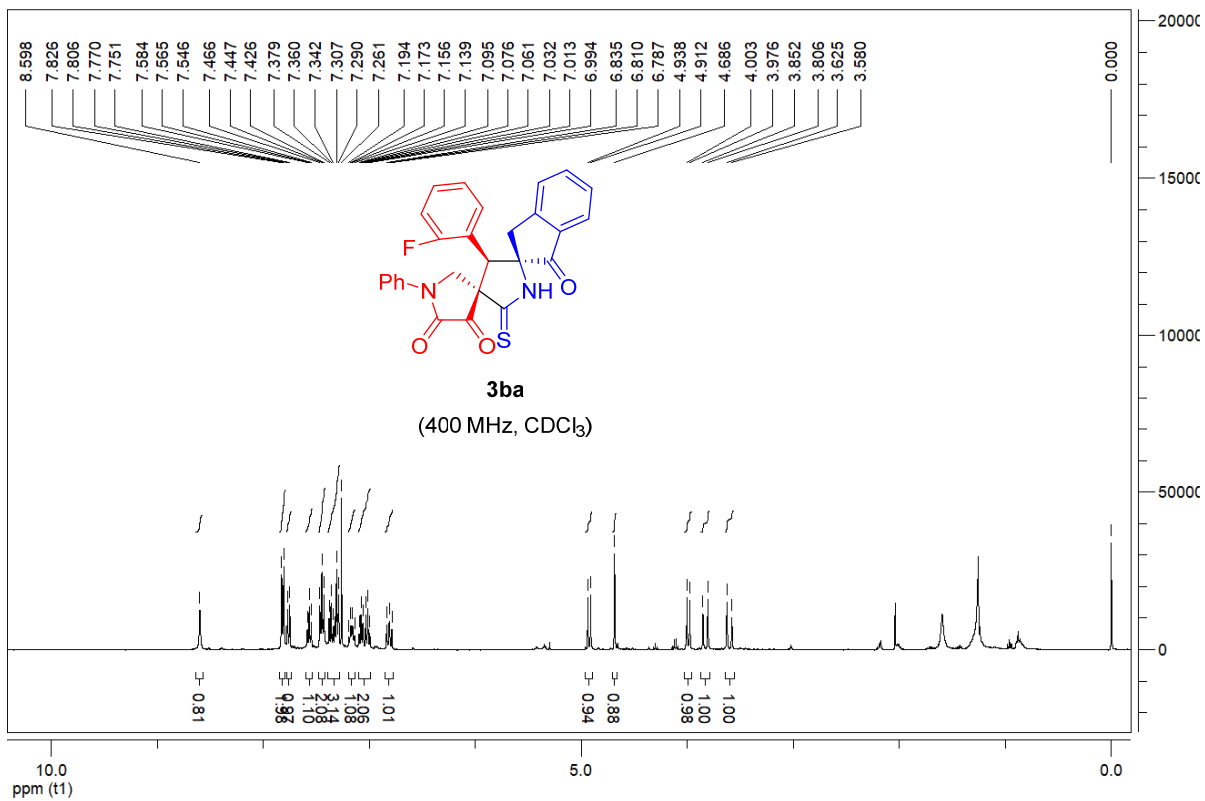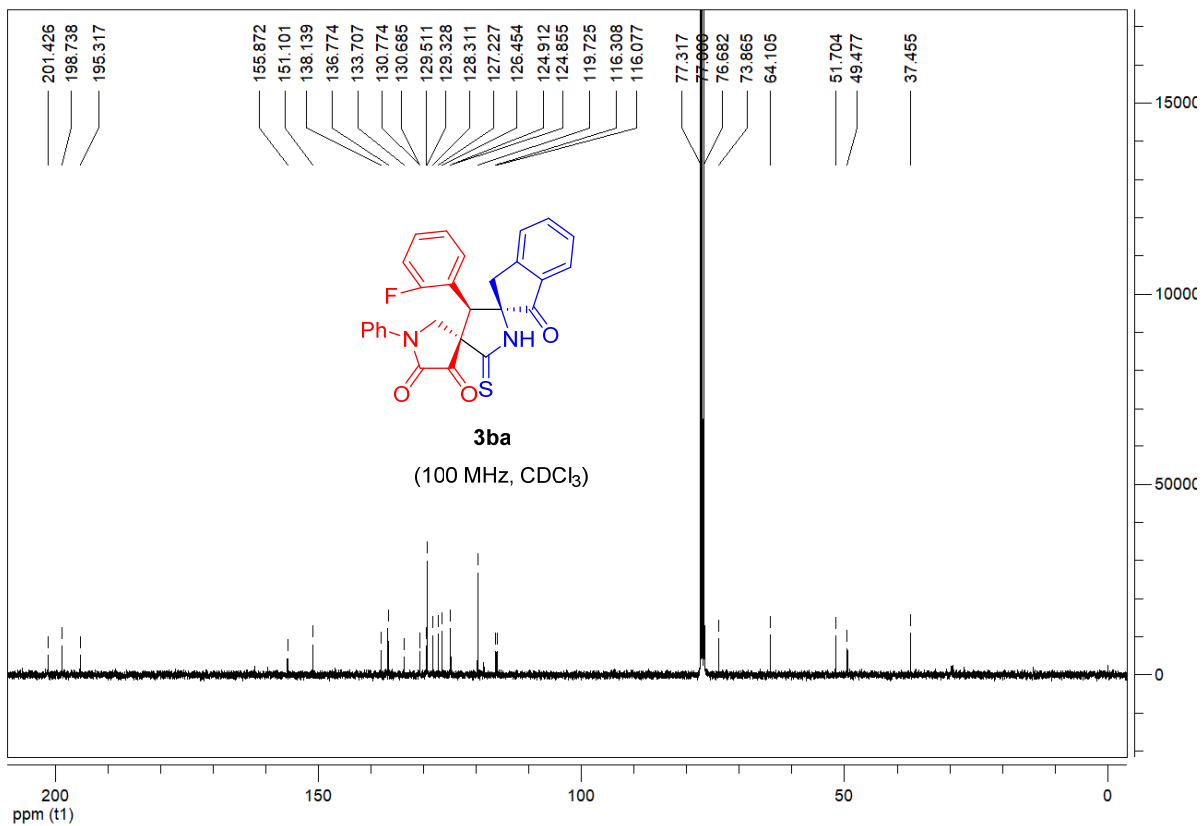

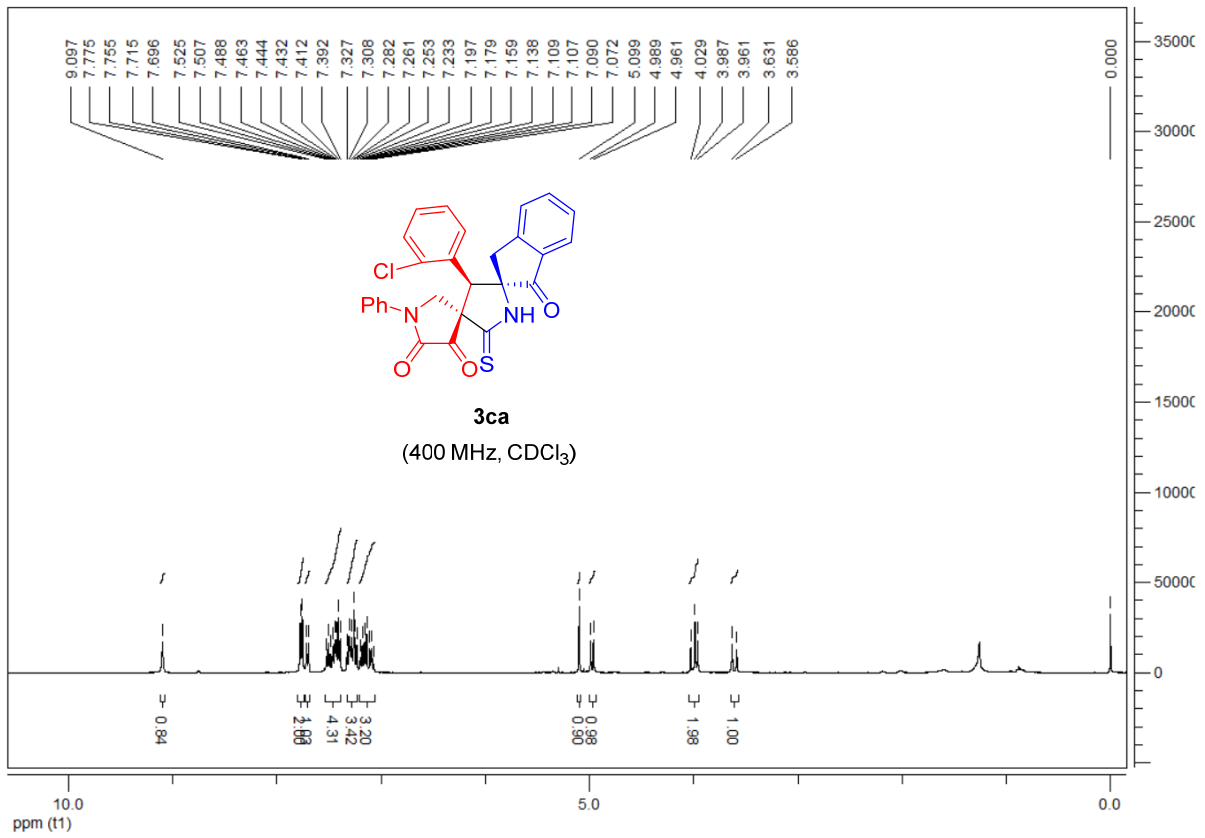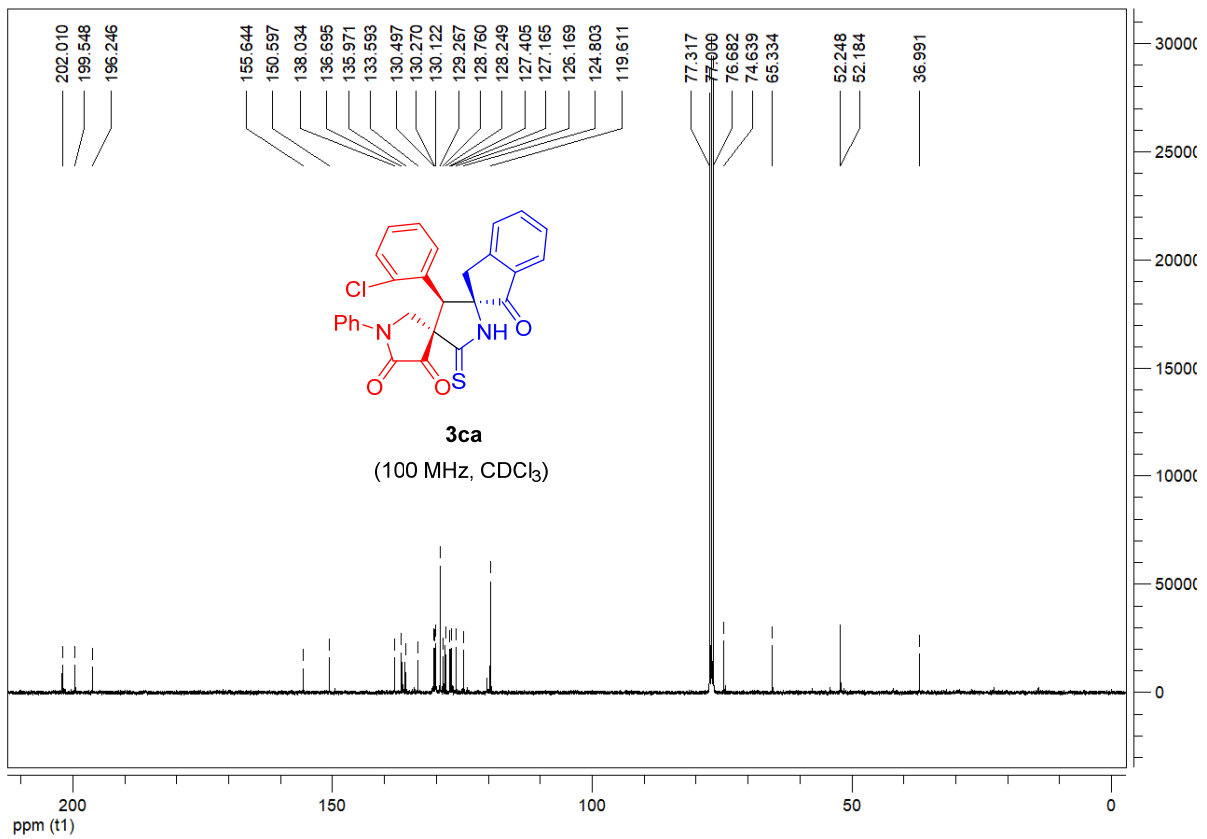

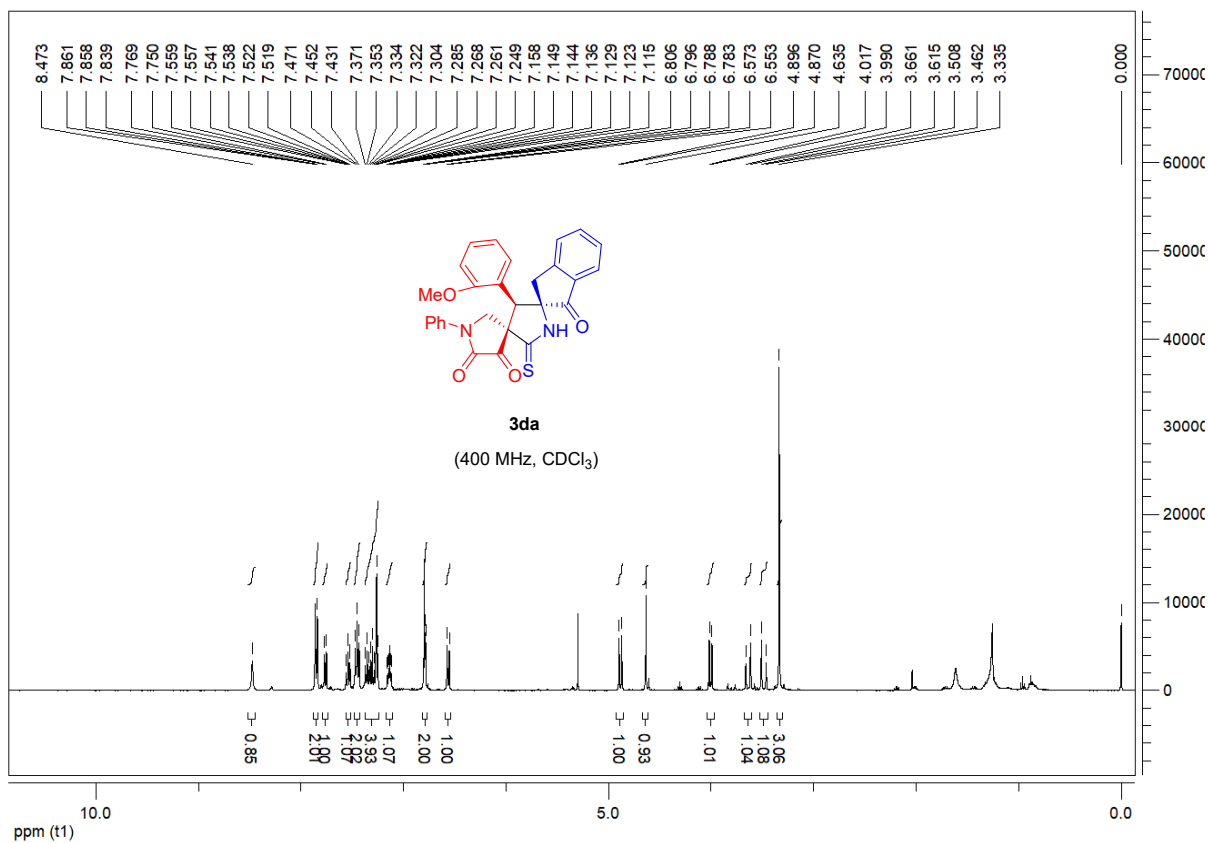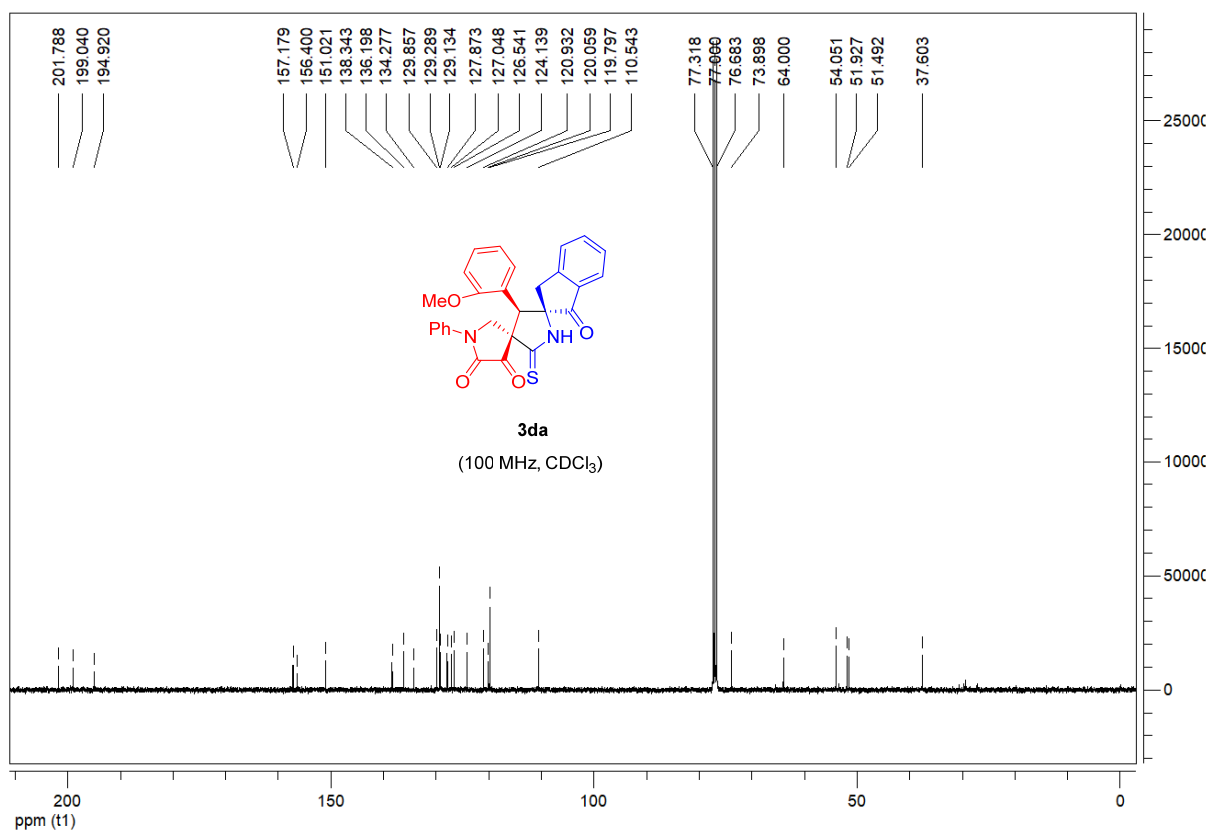





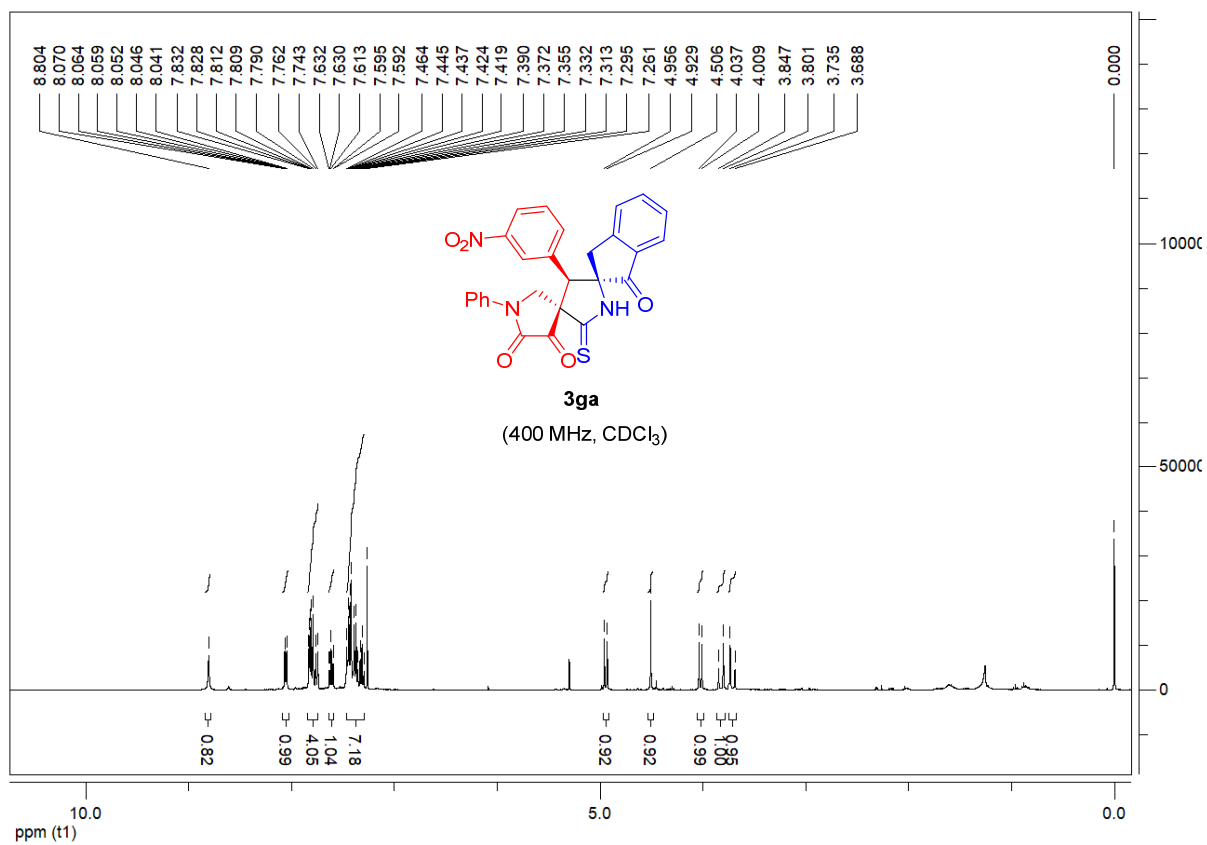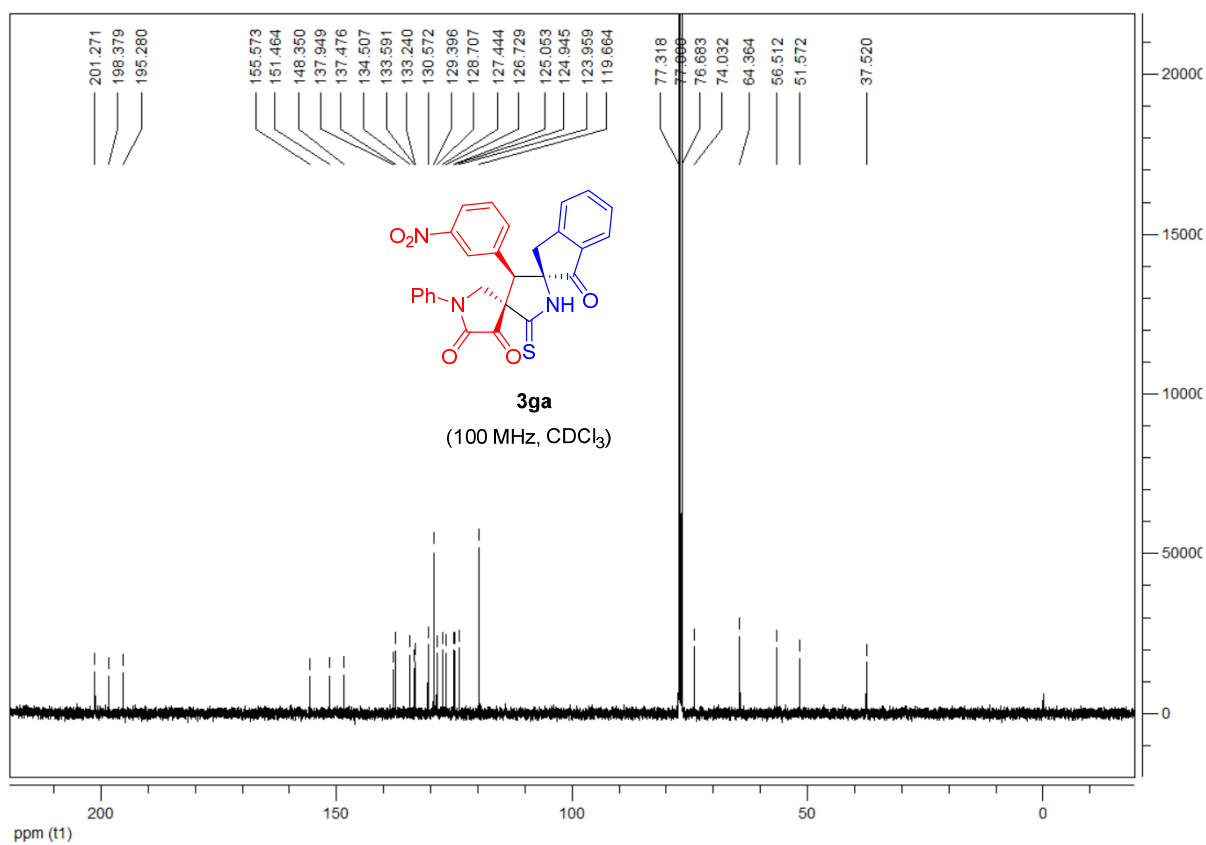

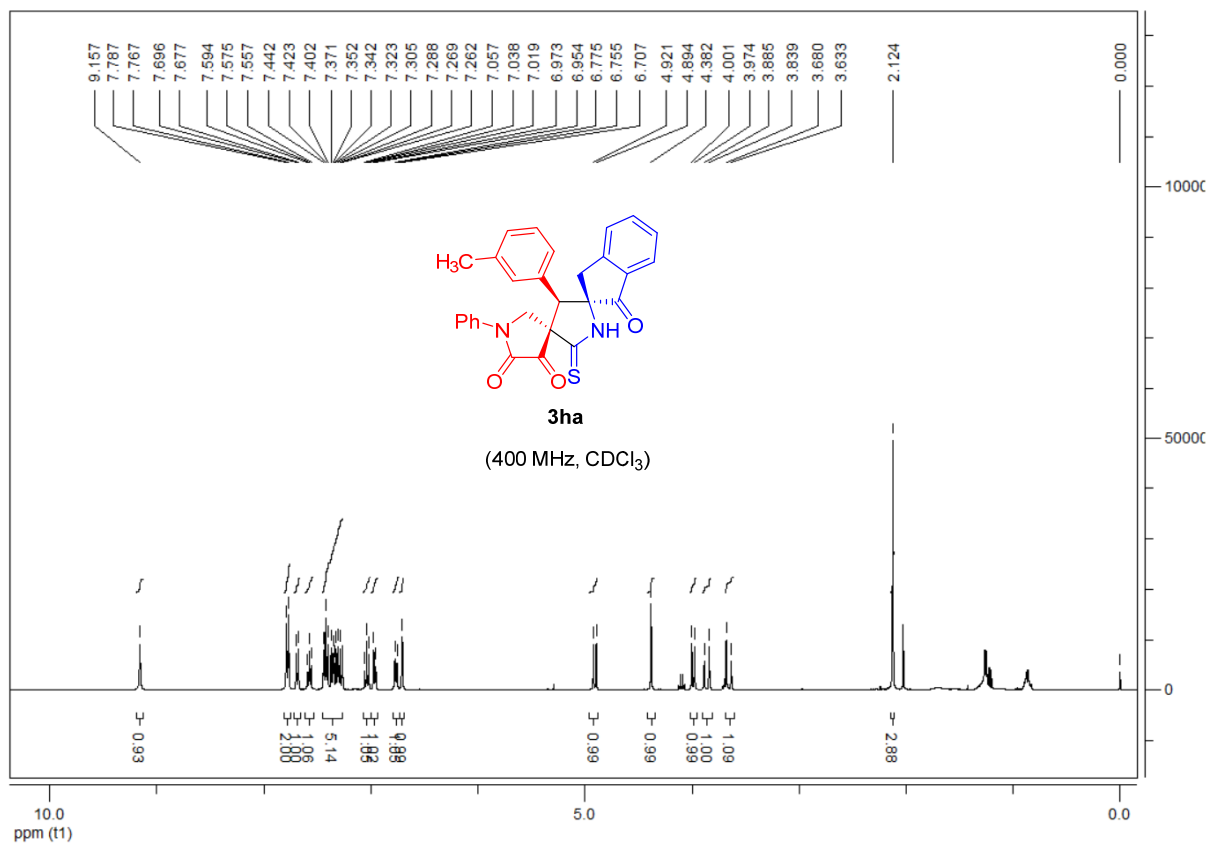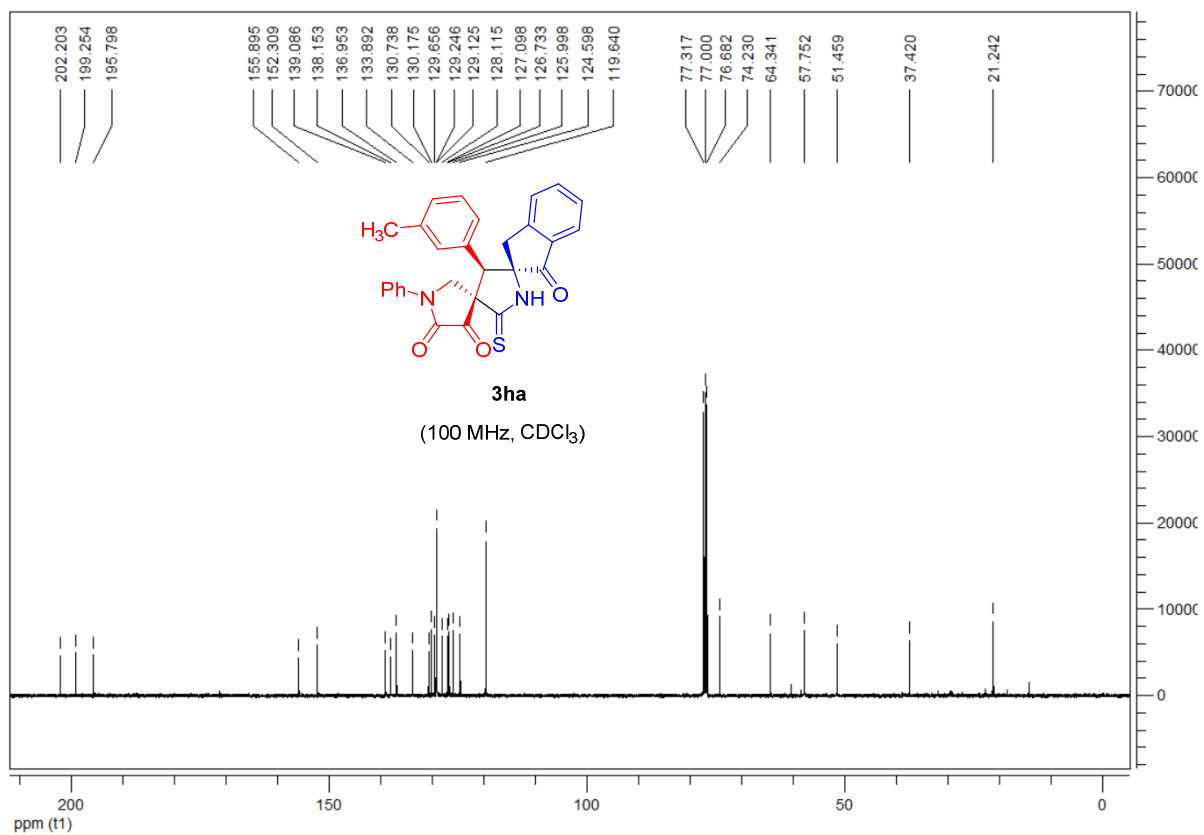

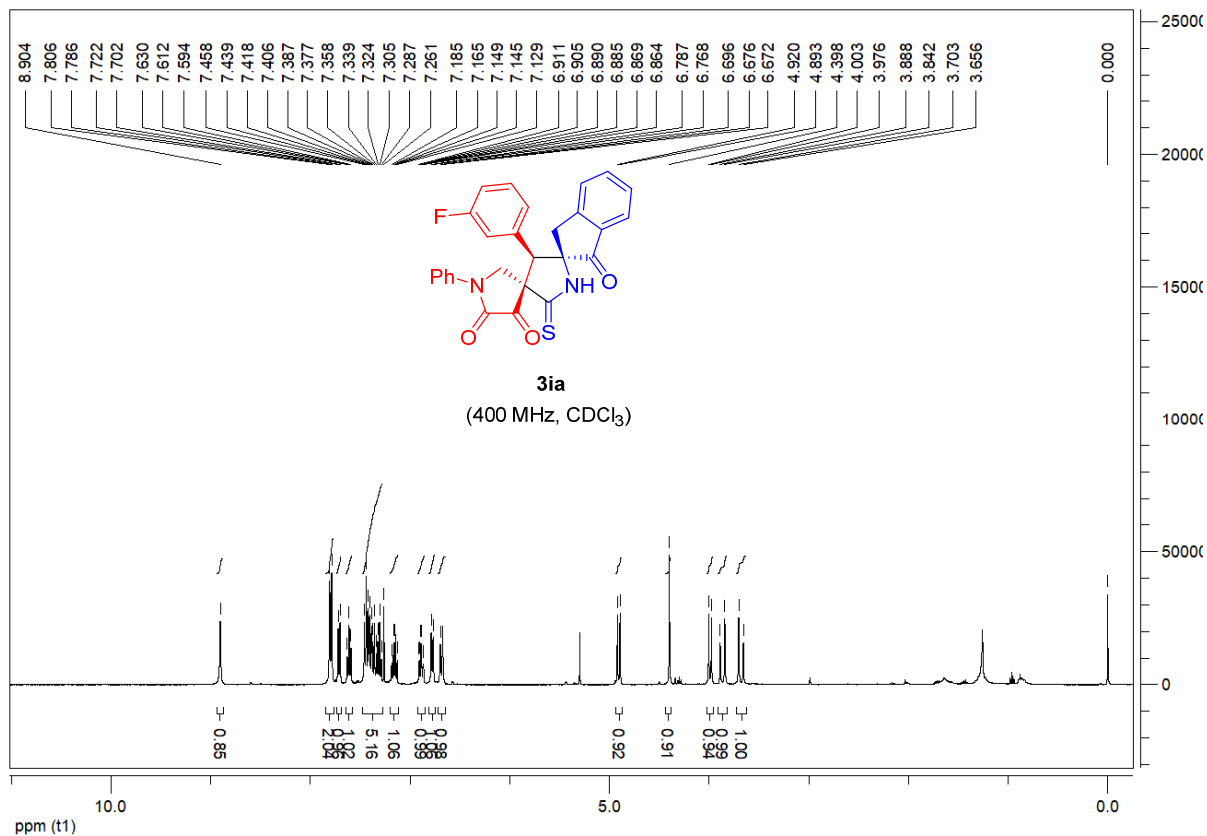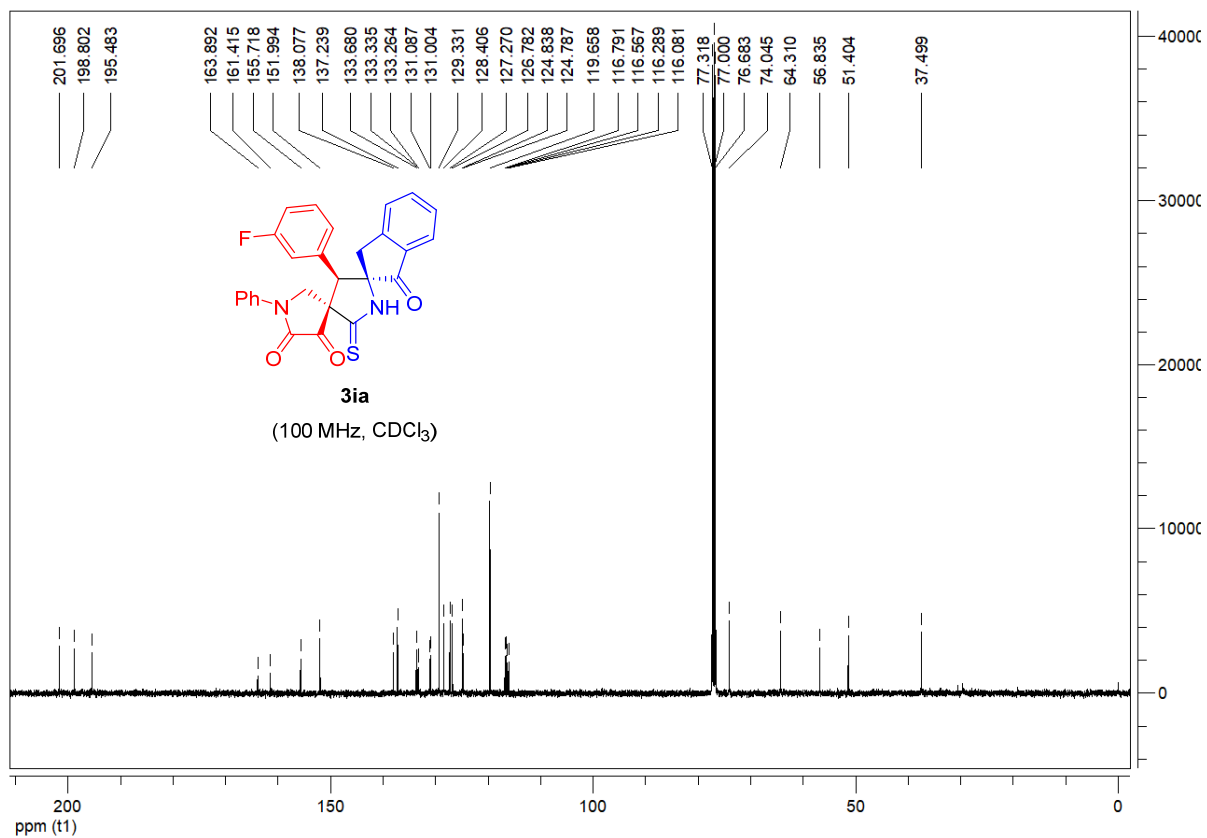



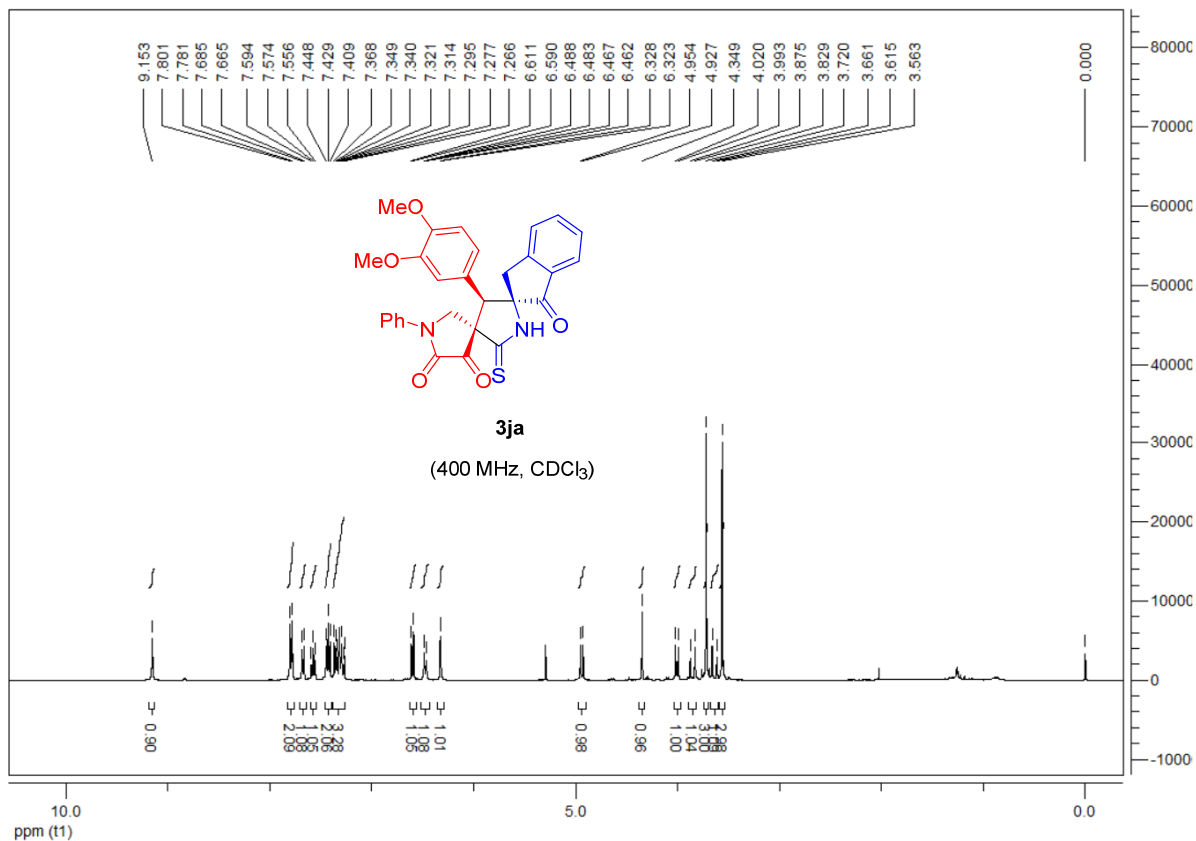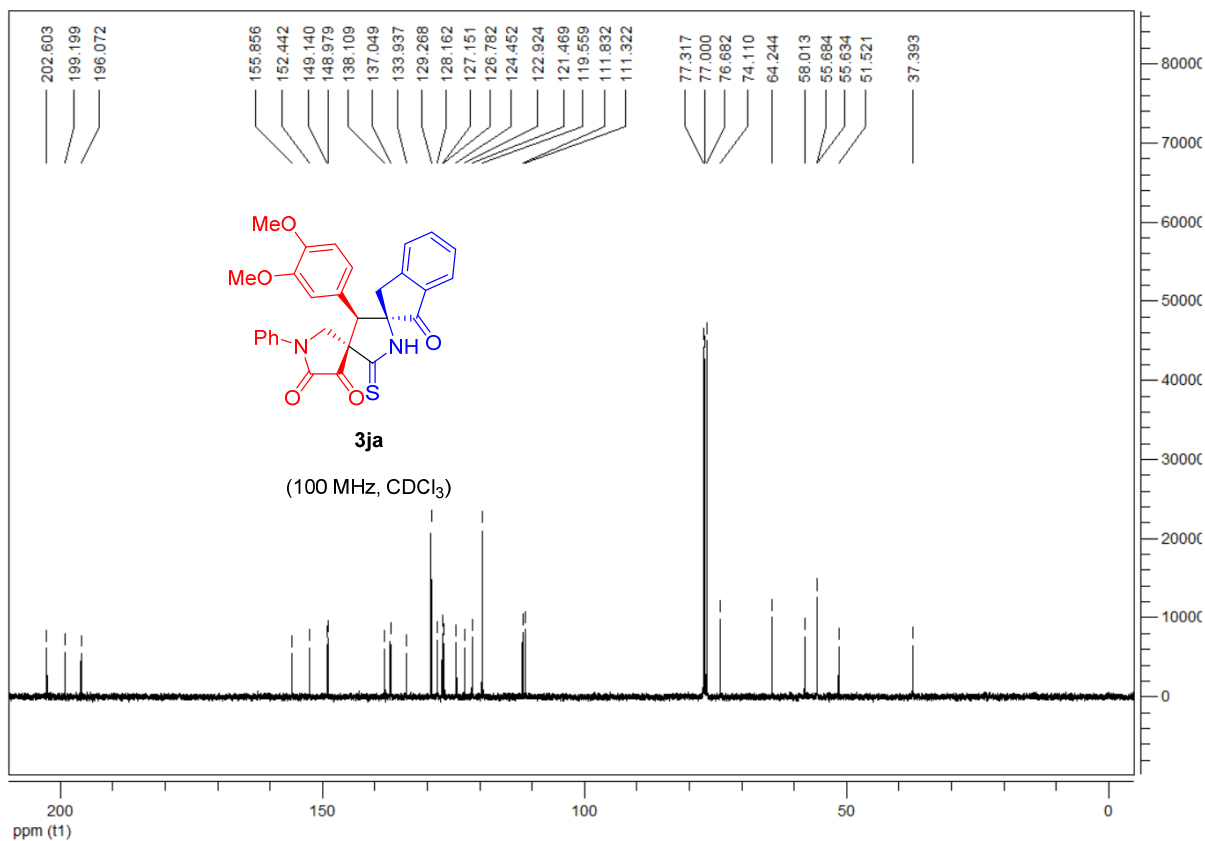

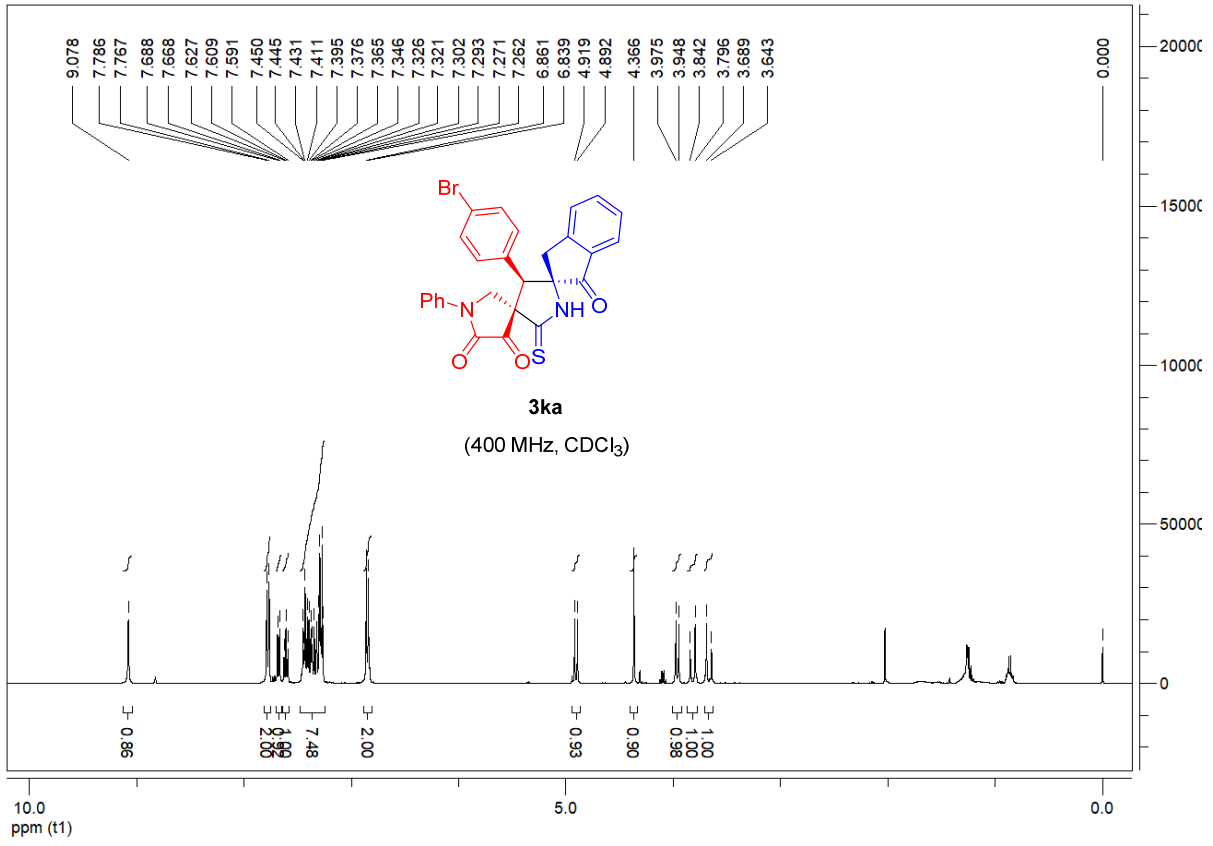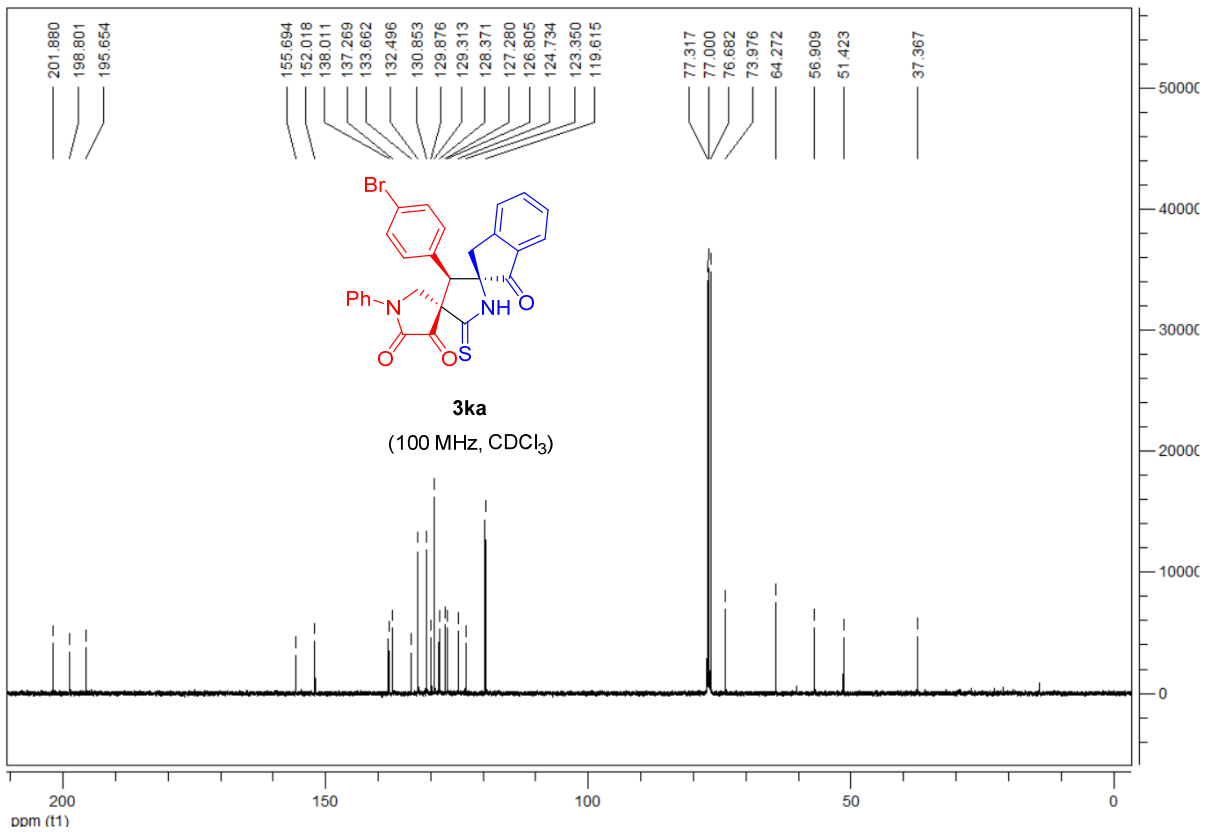

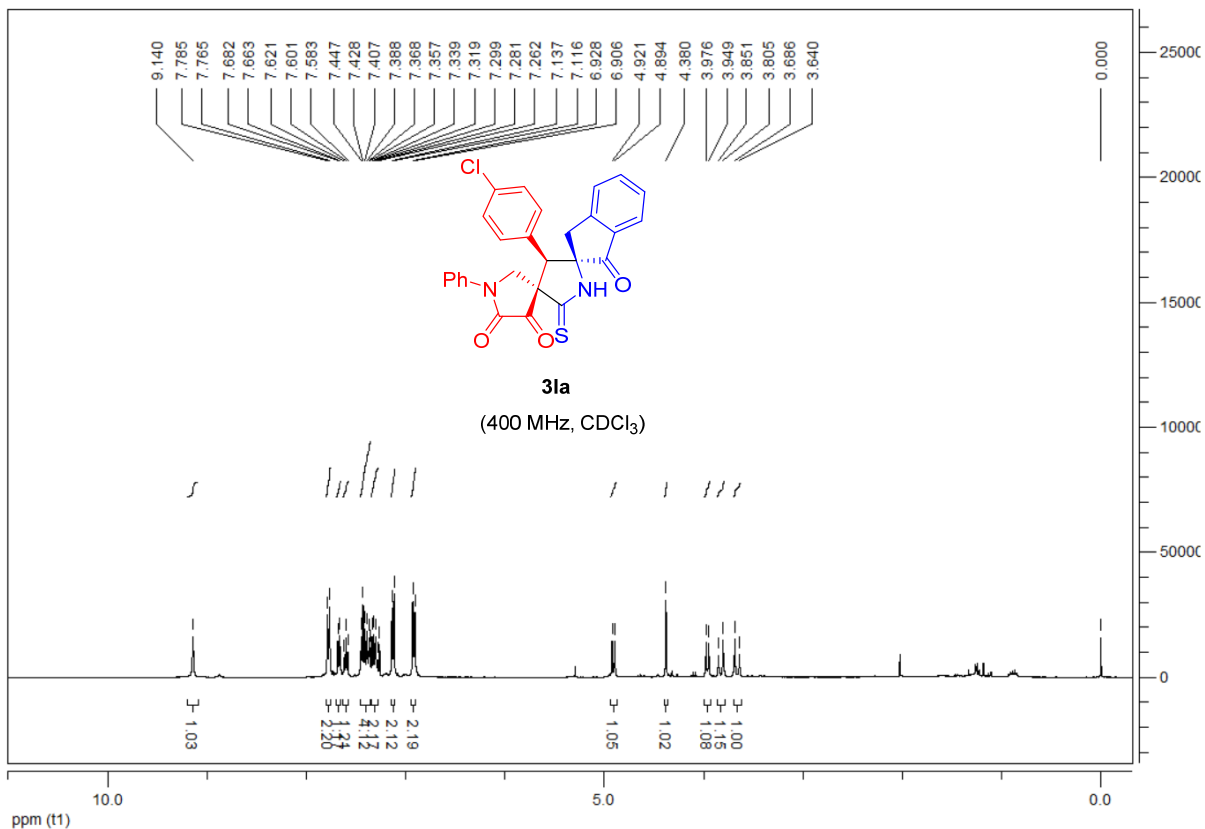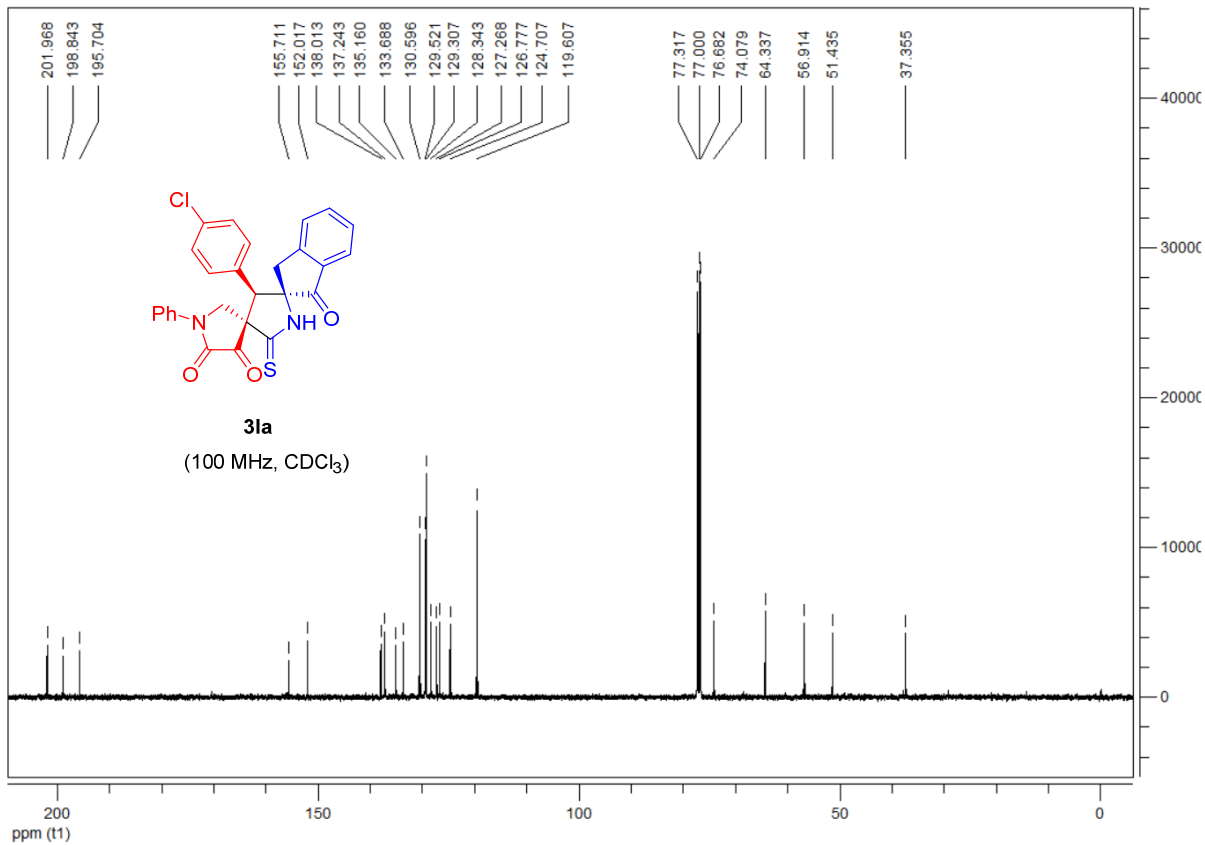

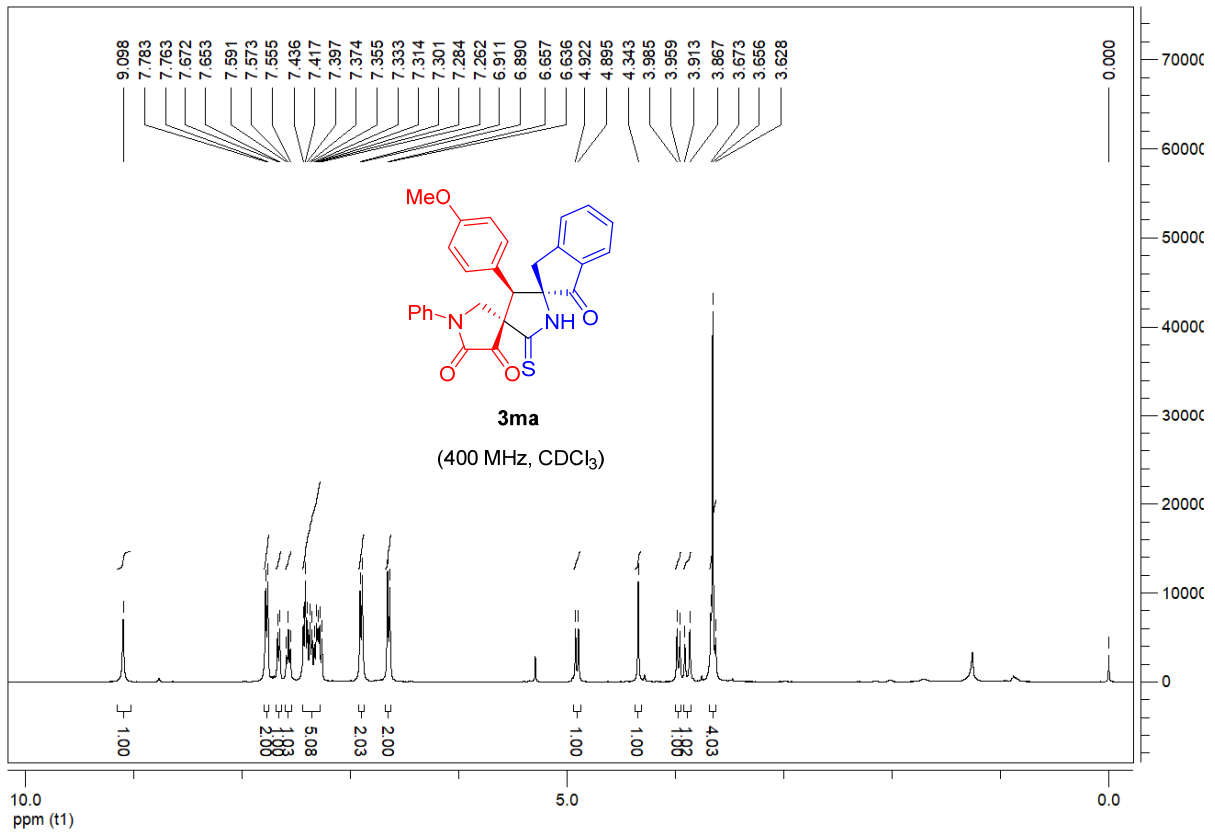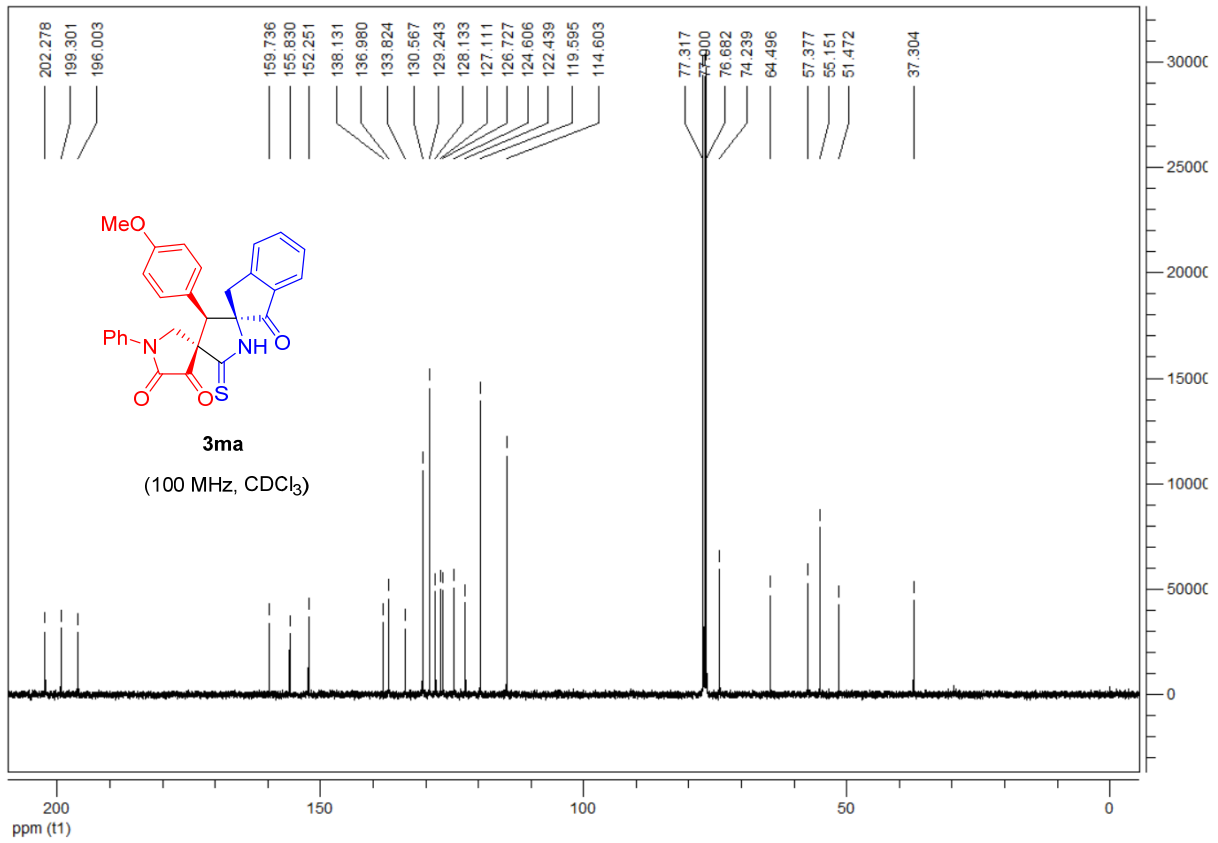

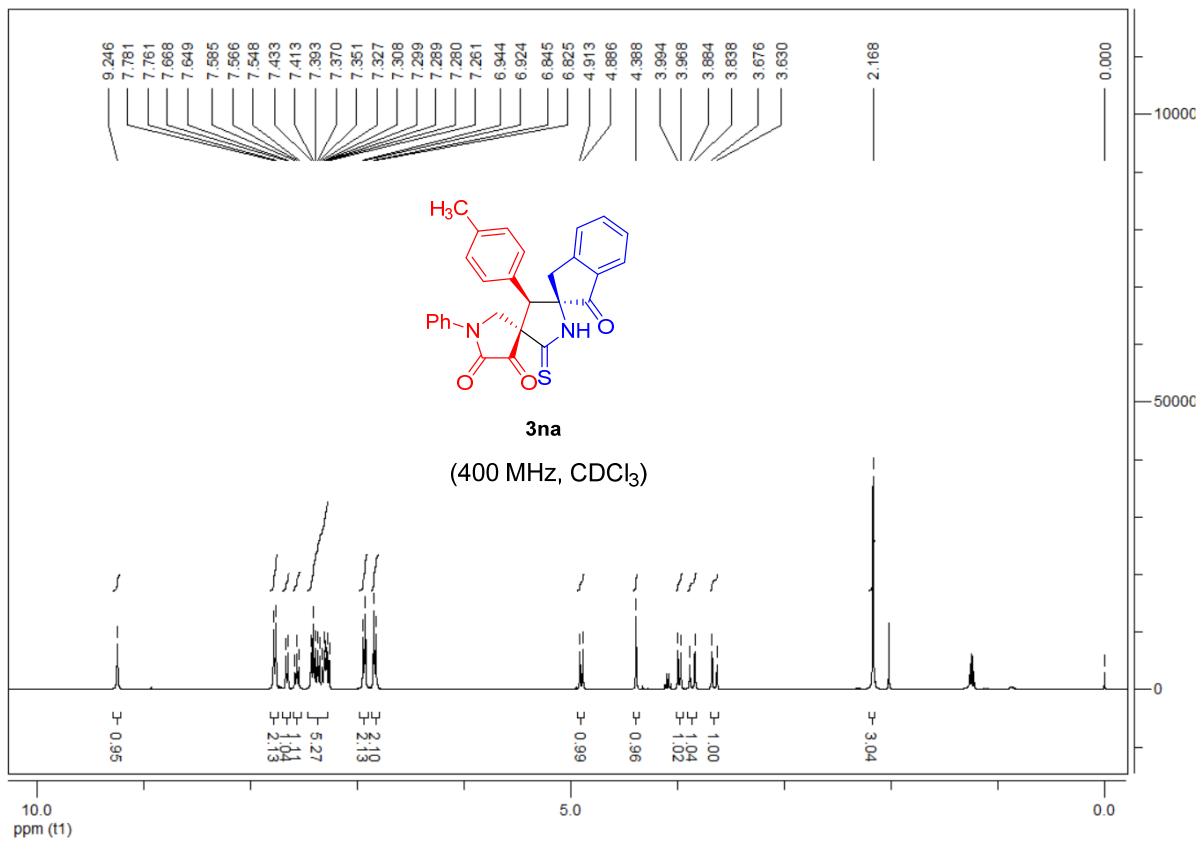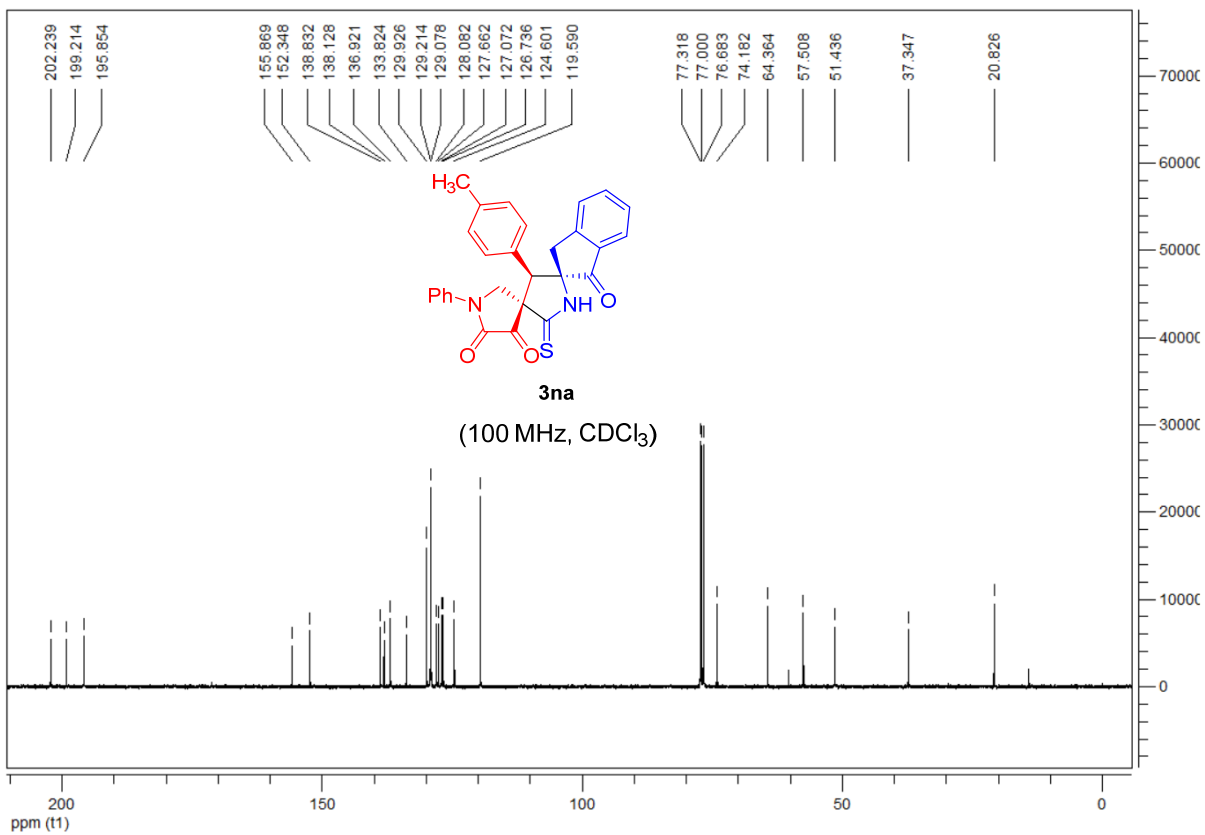

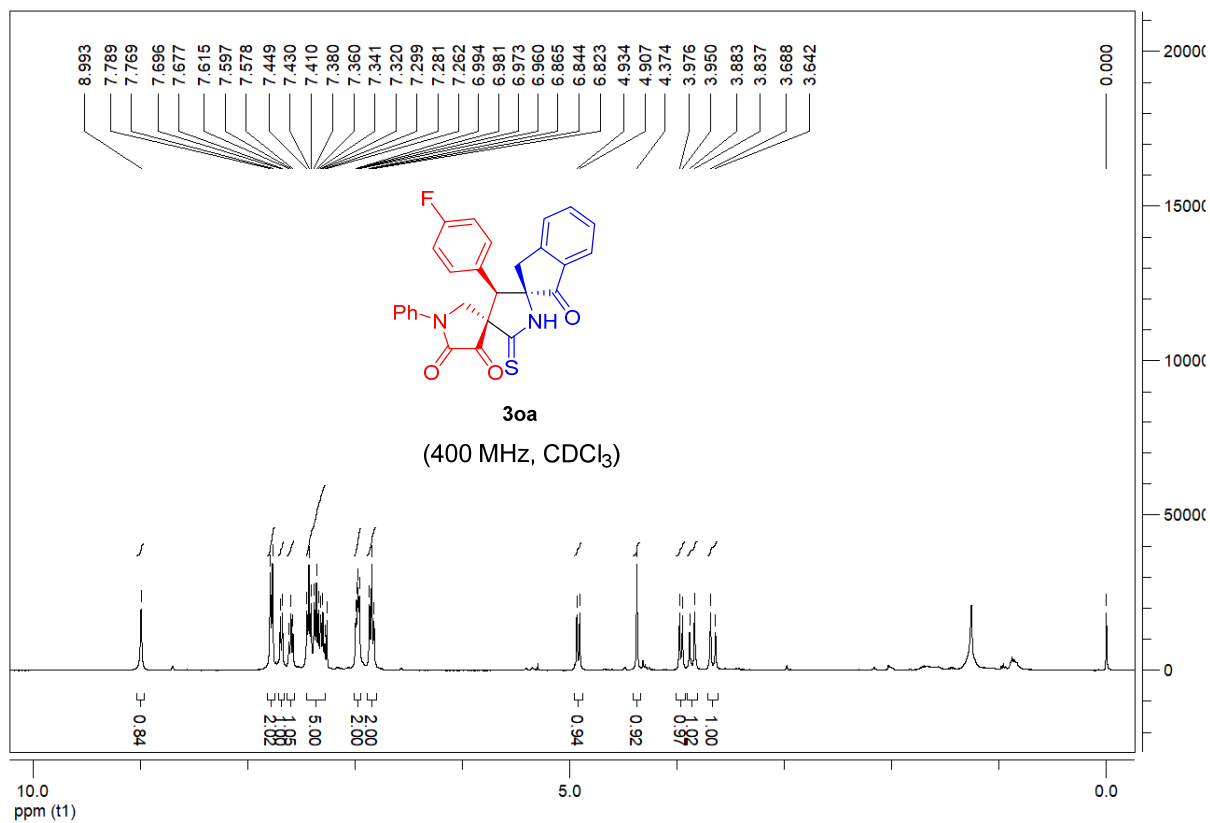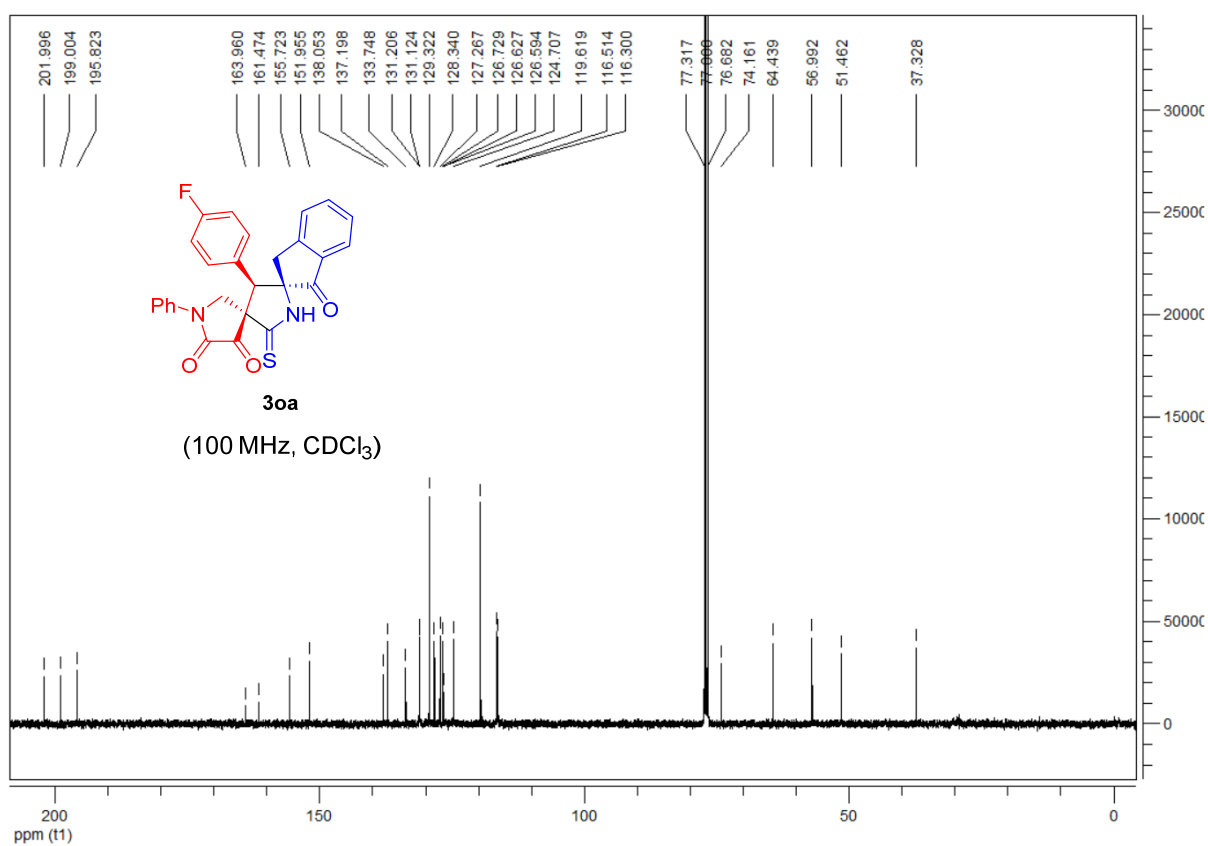



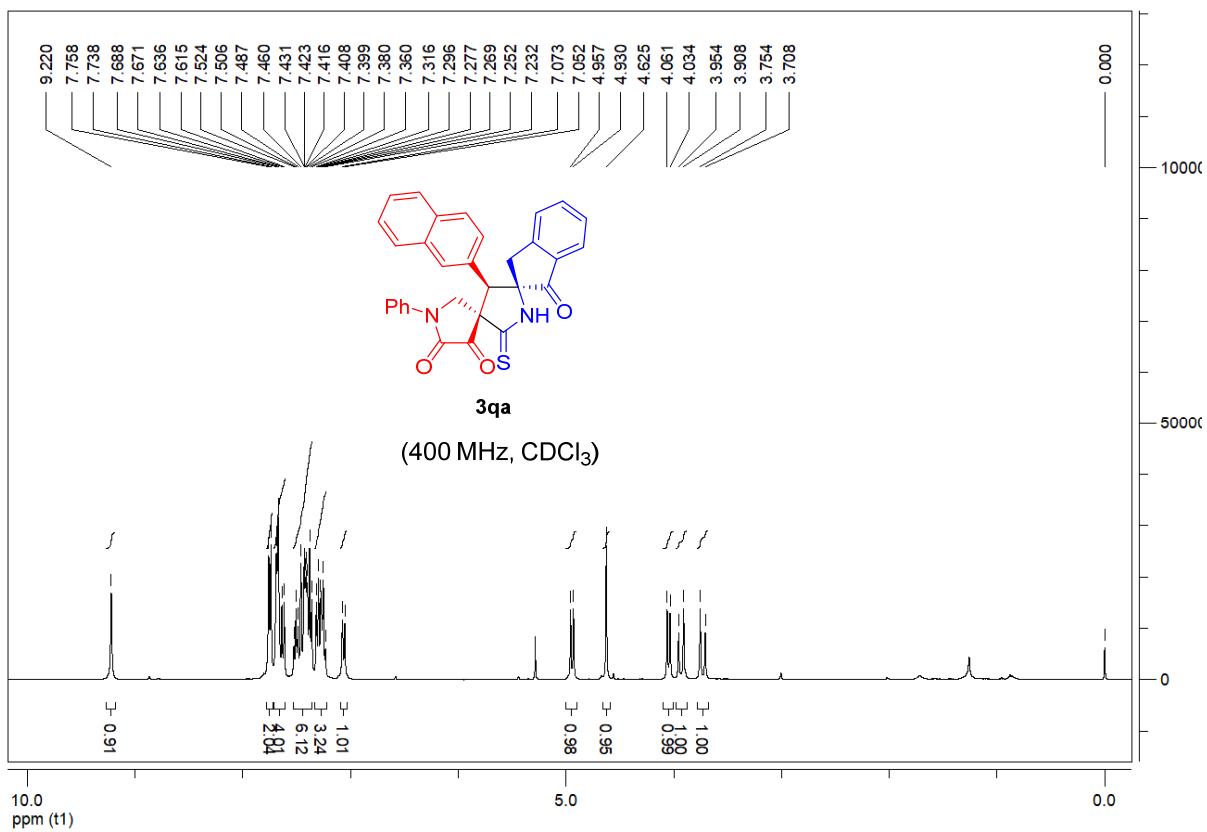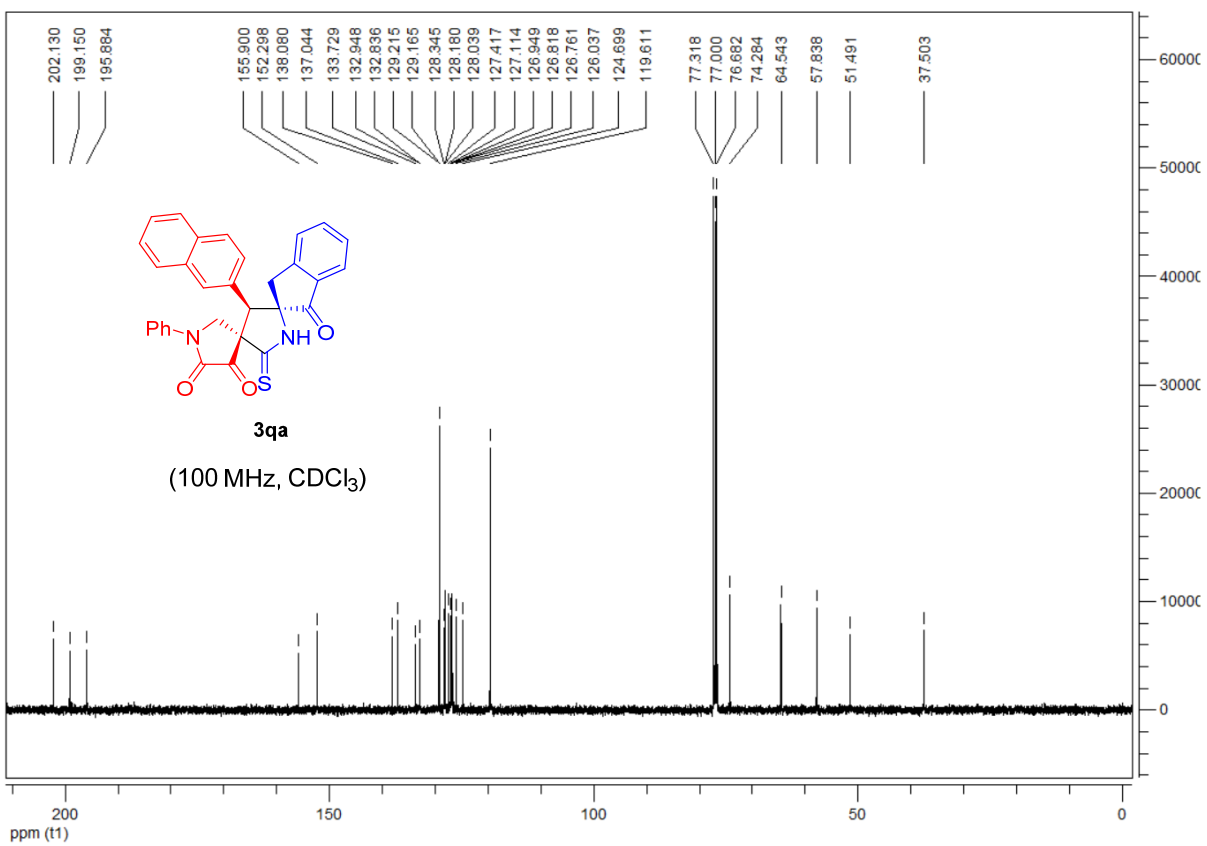



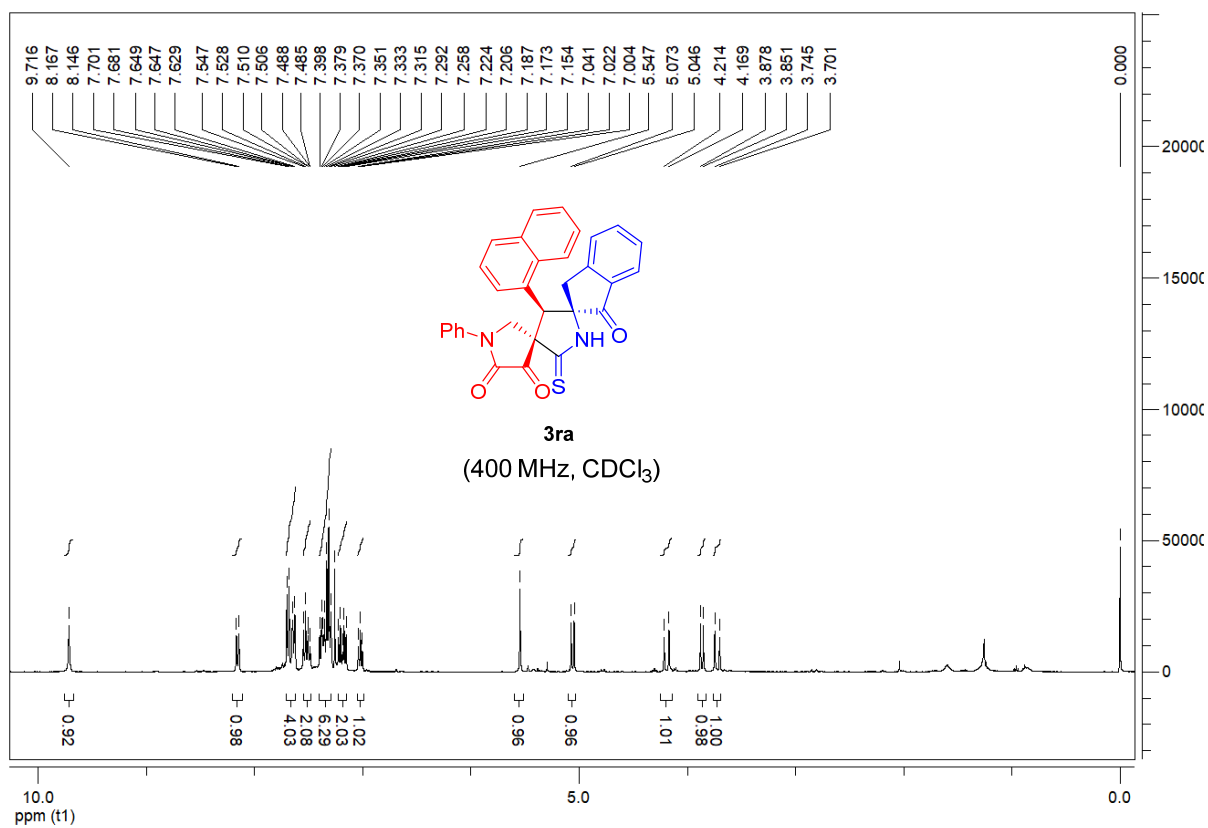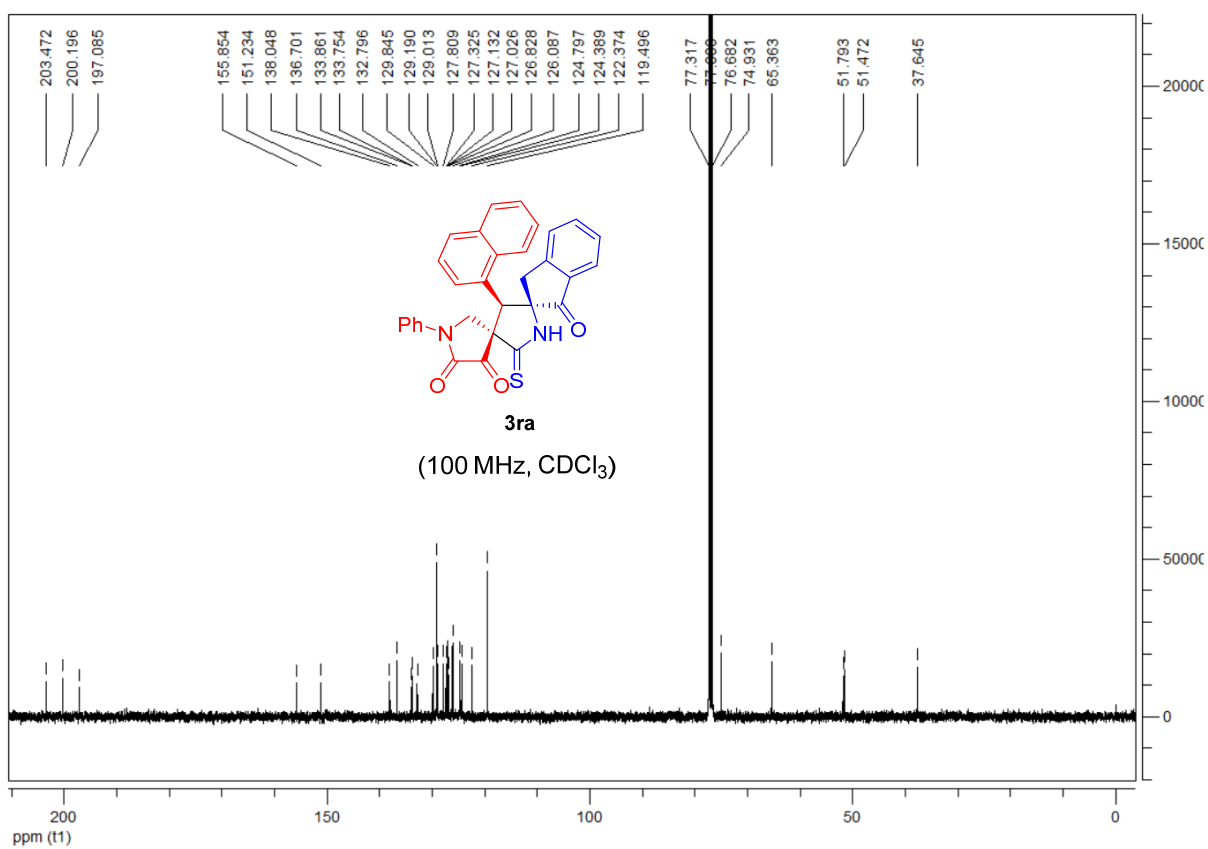

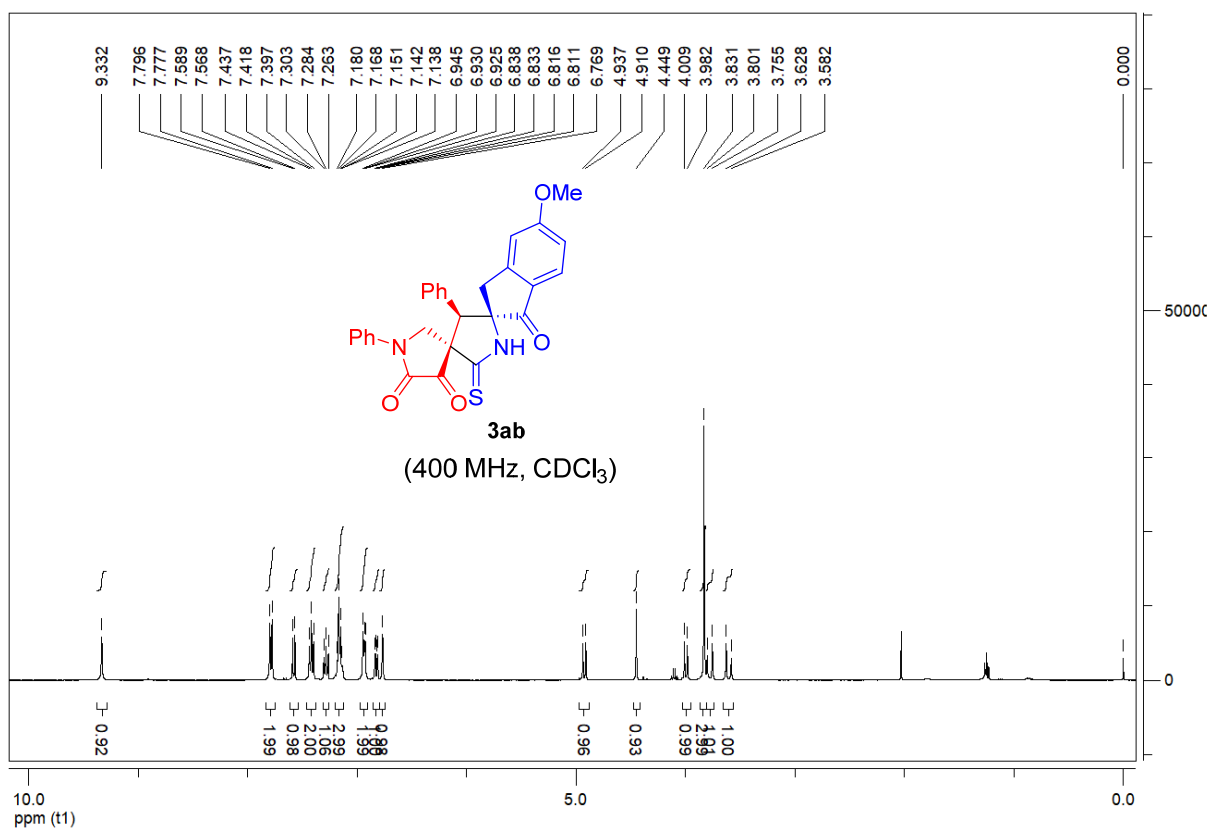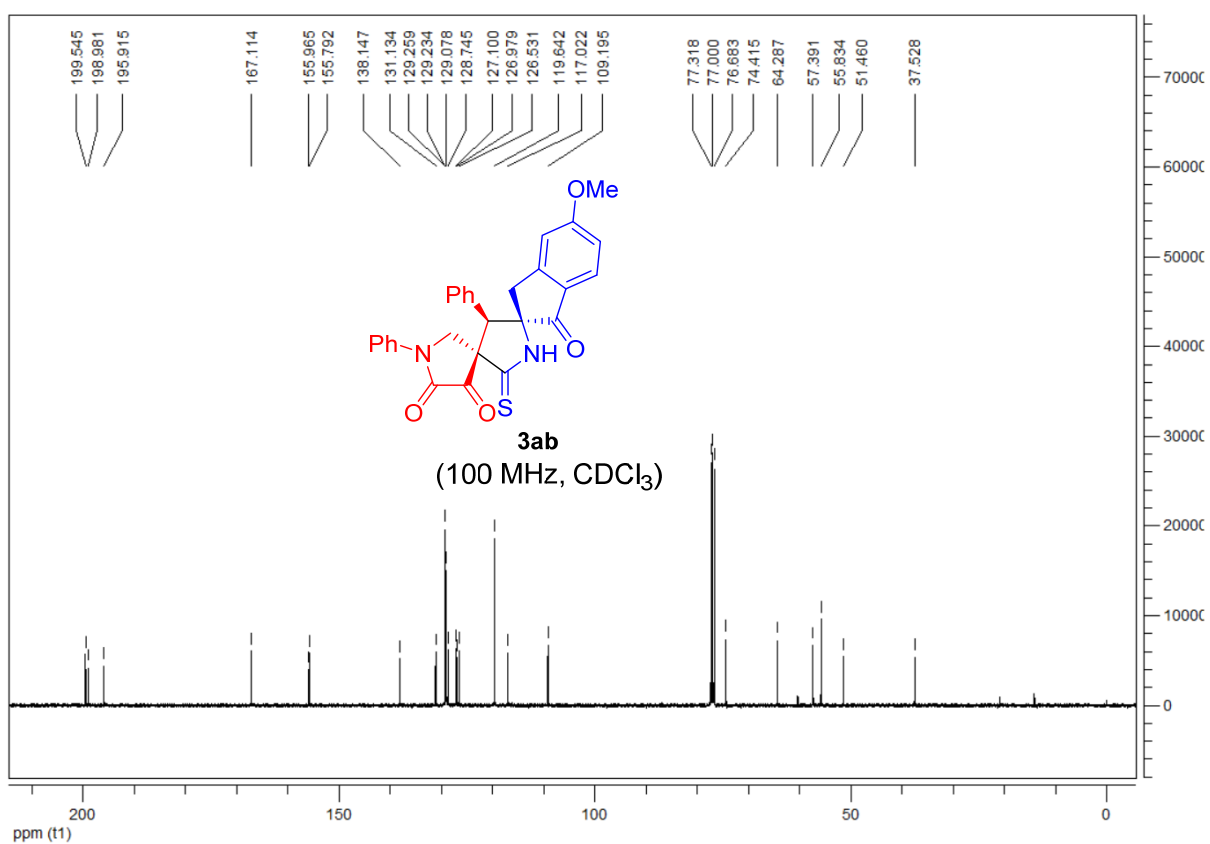

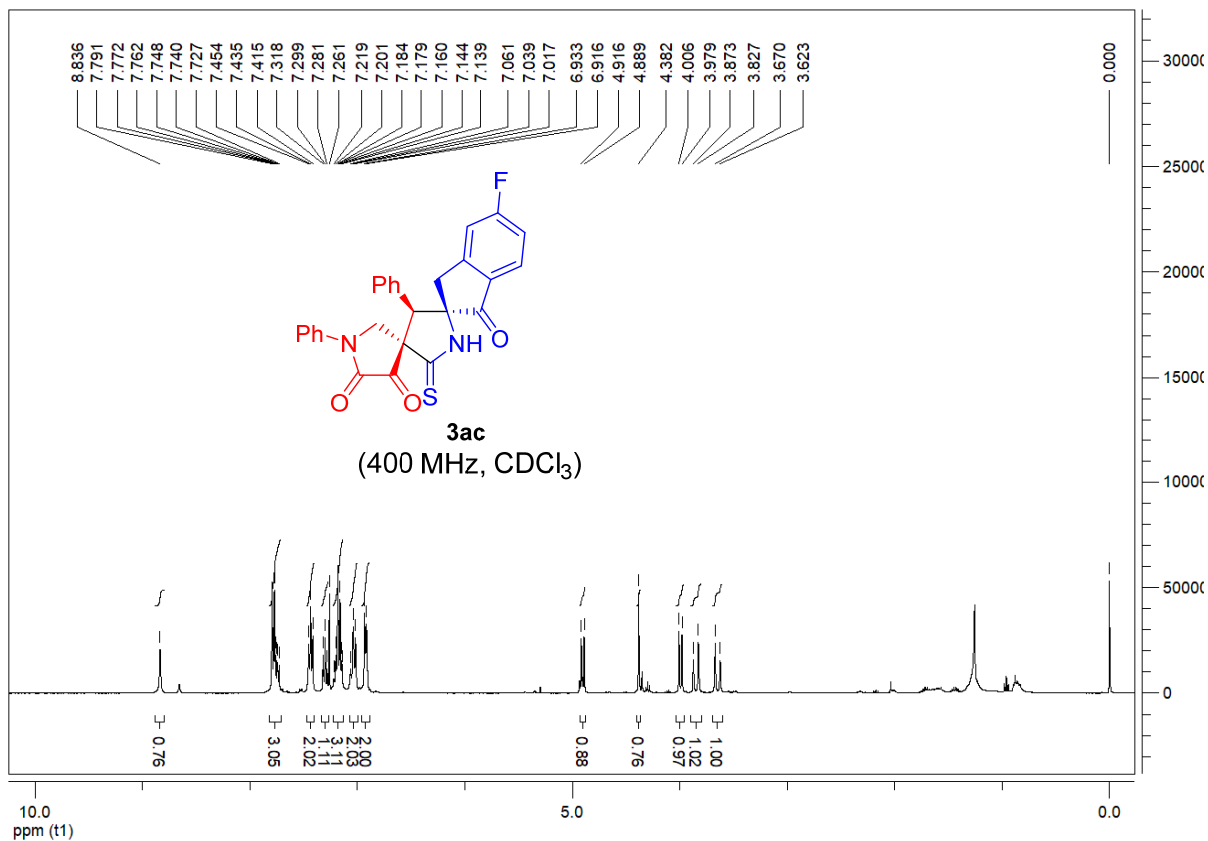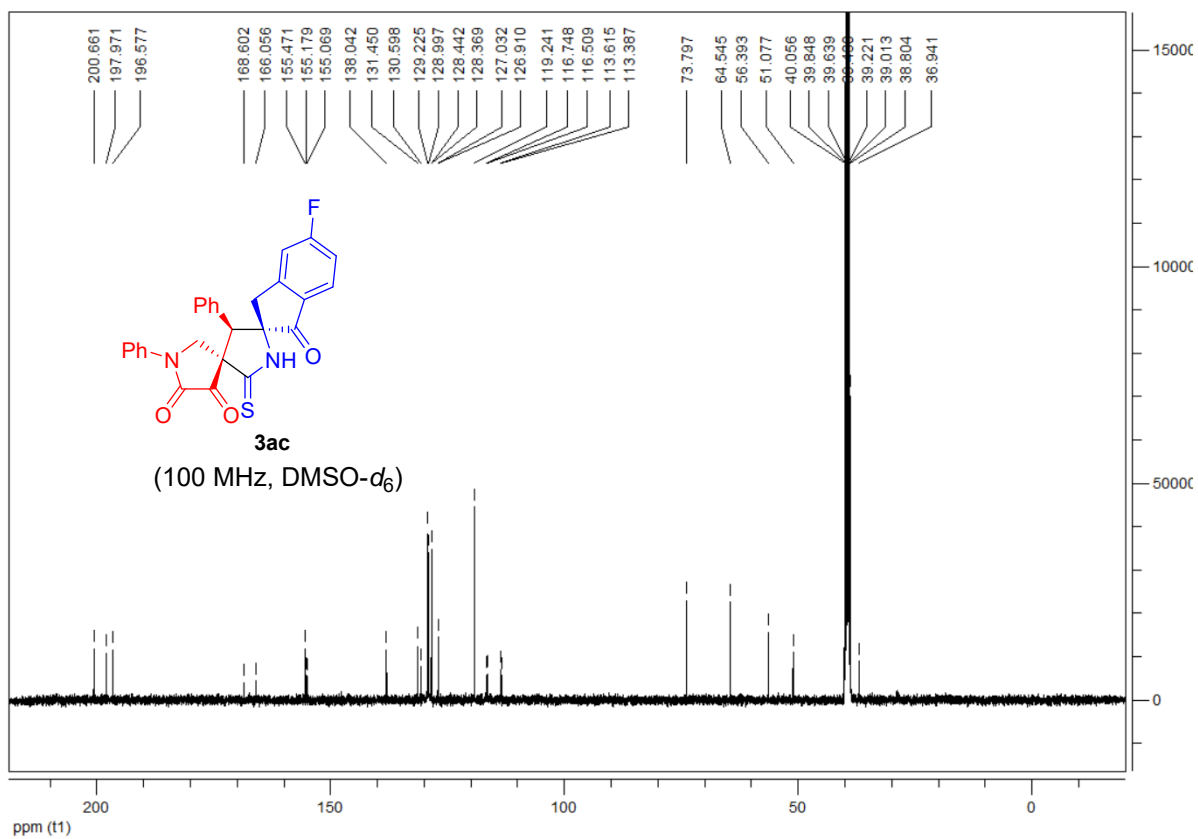

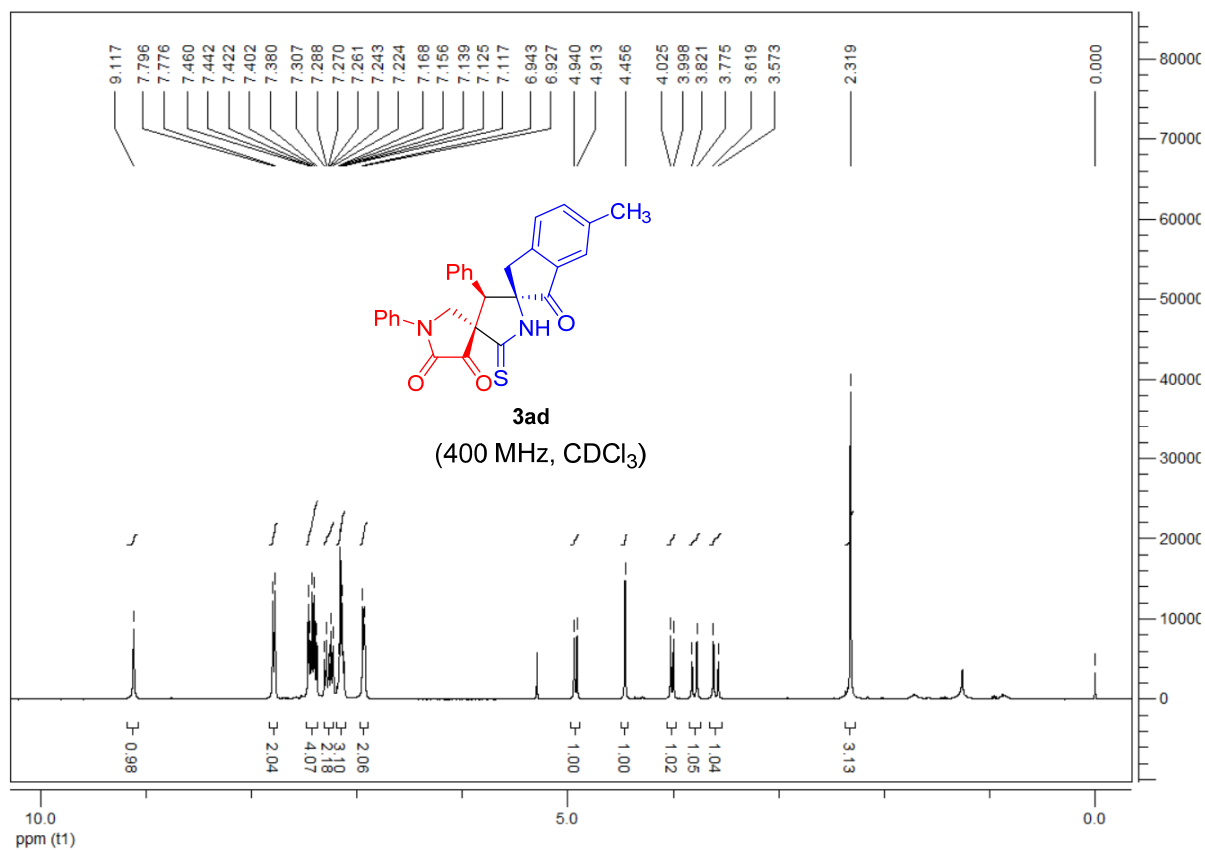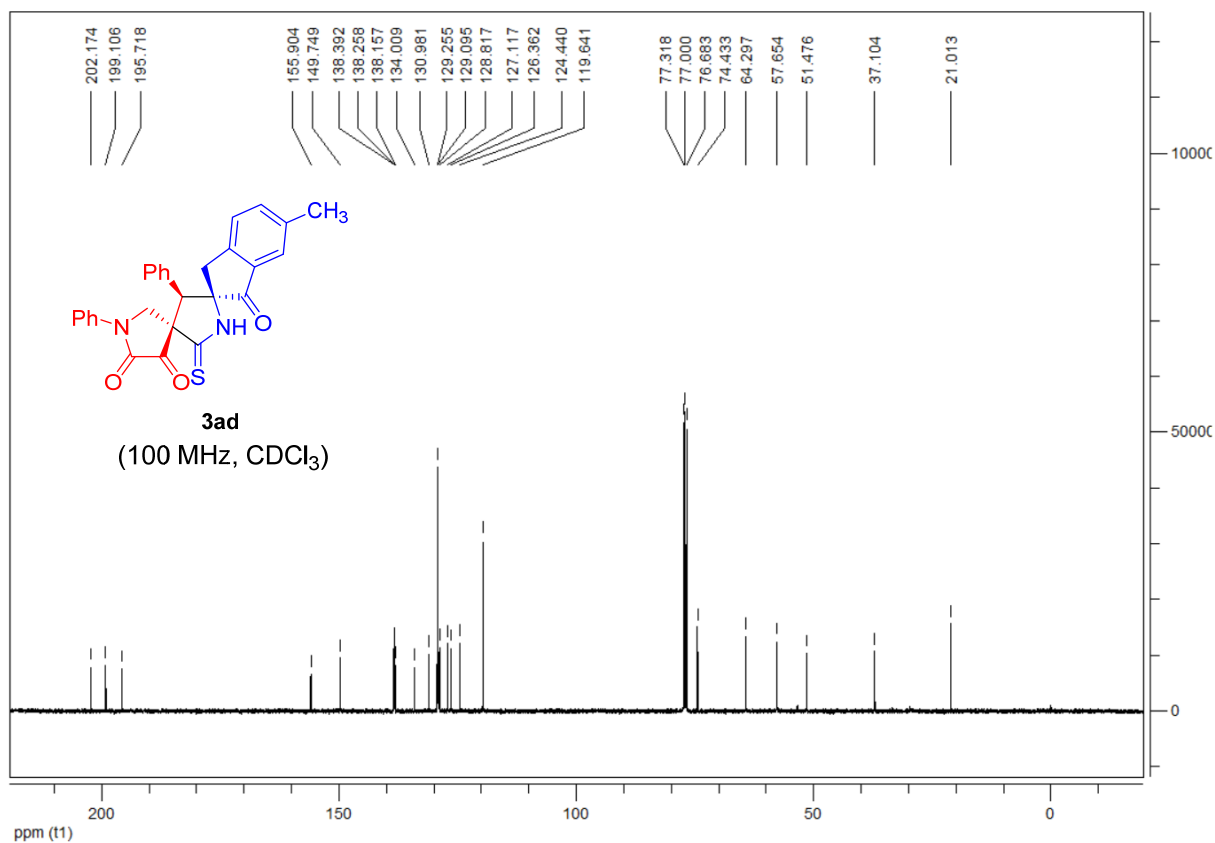

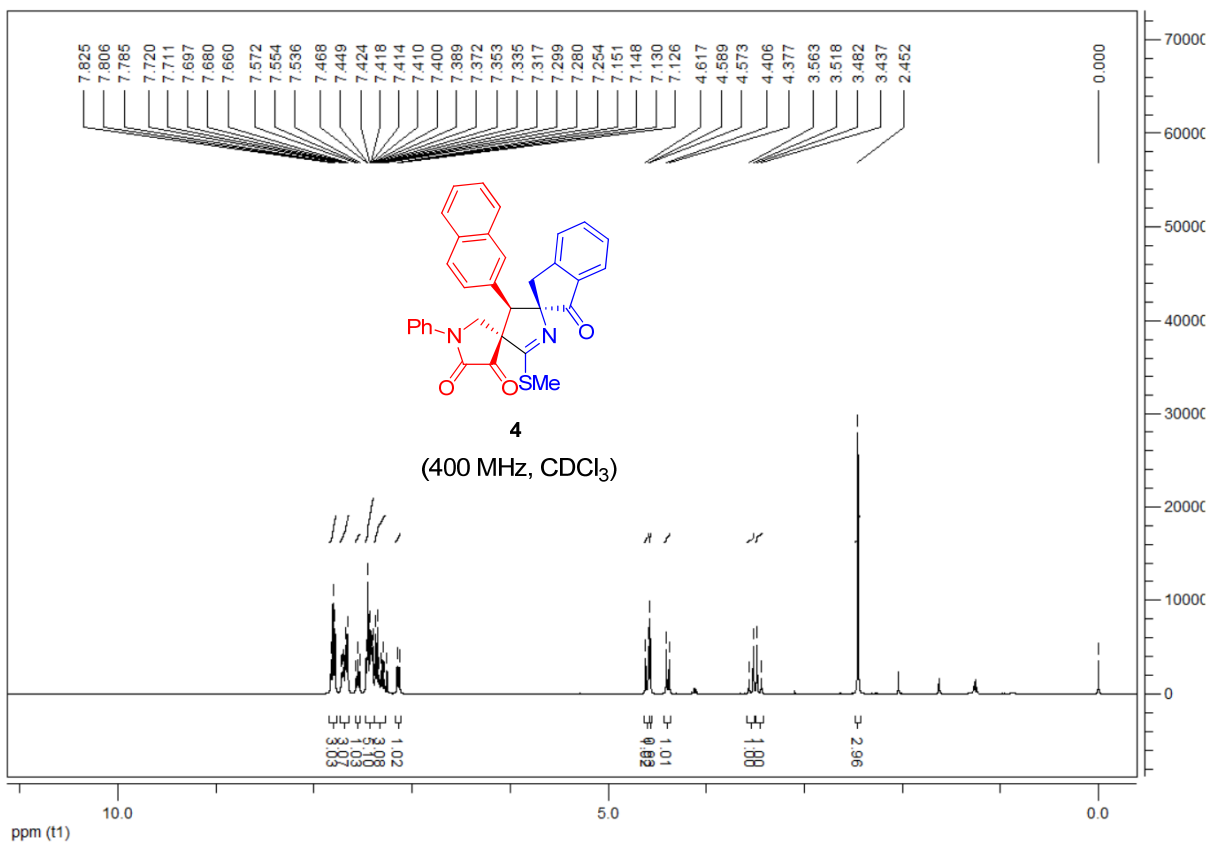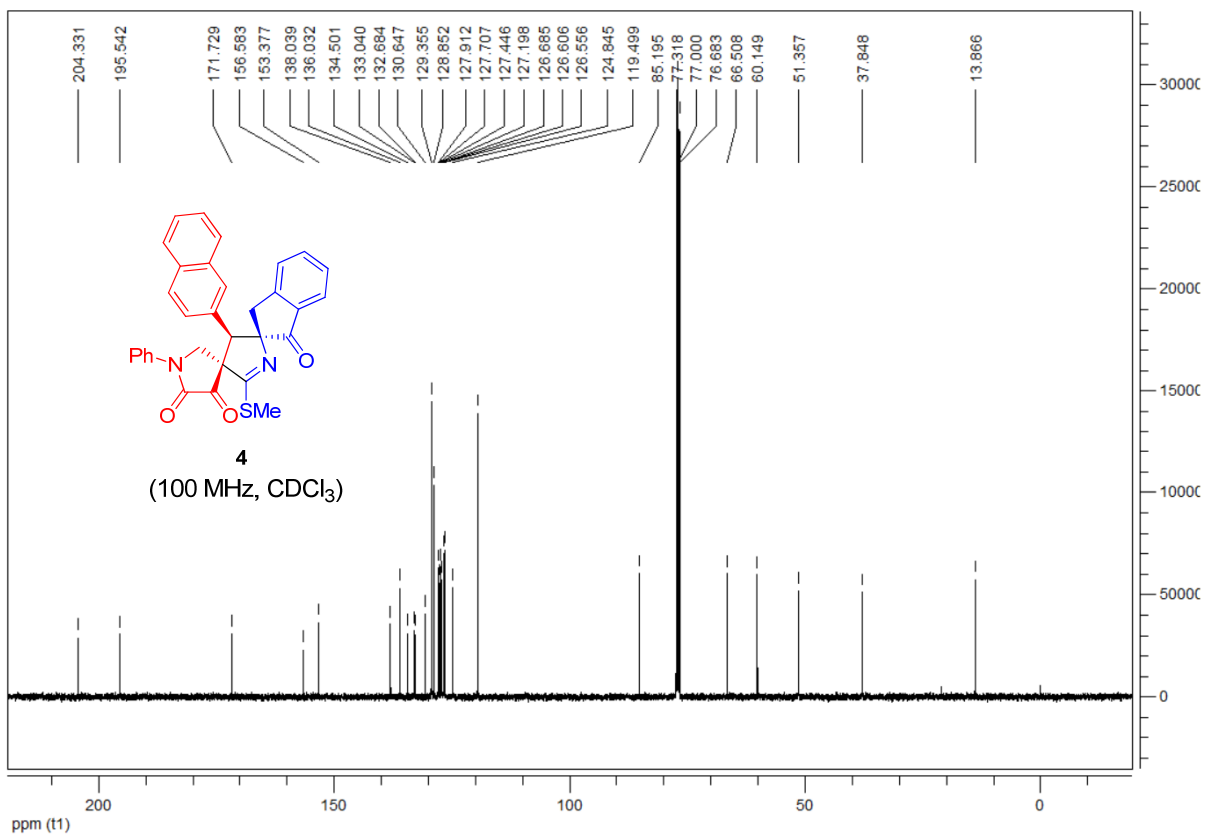



## 8. Copies of HPLC chromatograms of new products

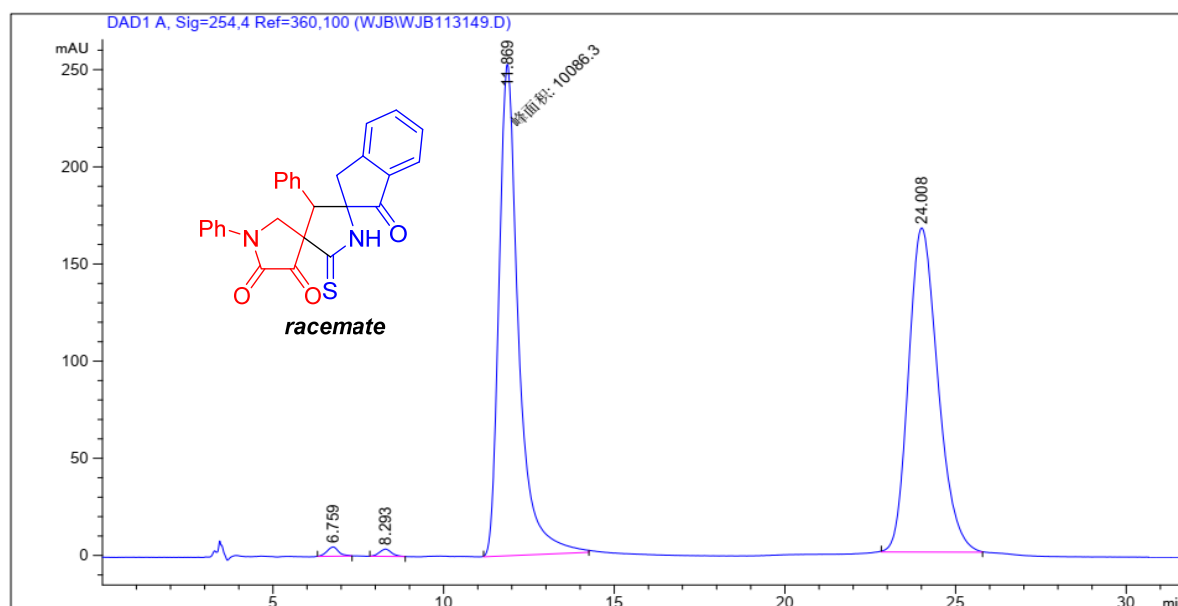

| Peak # | RetTime [min] | Type | Width [min] | Area [mAU*s] | Height [mAU] | Area %  |
|--------|---------------|------|-------------|--------------|--------------|---------|
| 1      | 6.759         | BB   | 0.3173      | 113.62323    | 4.78089      | 0.5596  |
| 2      | 8.293         | BB   | 0.3223      | 92.31229     | 3.76140      | 0.4547  |
| 3      | 11.869        | MM   | 0.6647      | 1.00863e4    | 252.91548    | 49.6797 |
| 4      | 24.008        | BB   | 0.8962      | 1.00104e4    | 166.79616    | 49.3060 |

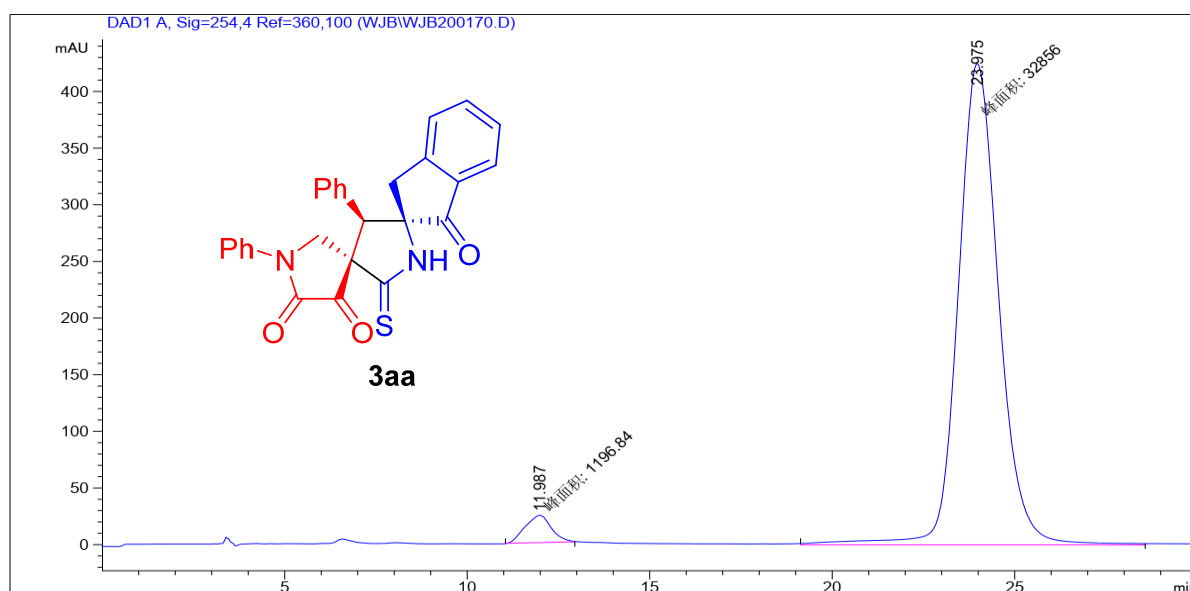

| Peak # | RetTime [min] | Type | Width [min] | Area [mAU*s] | Height [mAU] | Area %  |
|--------|---------------|------|-------------|--------------|--------------|---------|
| 1      | 11.987        | MM   | 0.8293      | 1196.84241   | 24.05317     | 3.5147  |
| 2      | 23.975        | MM   | 1.2892      | 3.28560e4    | 424.76688    | 96.4853 |

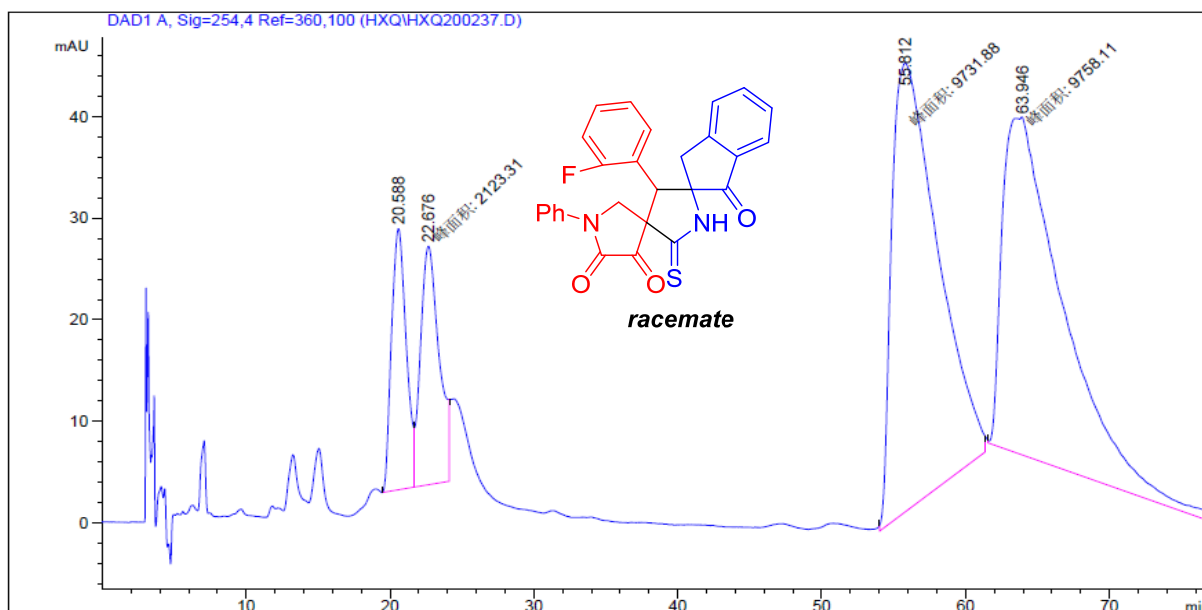

| Peak # | RetTime [min] | Type | Width [min] | Area [mAU*s] | Height [mAU] | Area %  |
|--------|---------------|------|-------------|--------------|--------------|---------|
| 1      | 20.588        | BV   | 0.9542      | 1820.73657   | 25.71110     | 7.7696  |
| 2      | 22.676        | MF   | 1.5067      | 2123.31372   | 23.48732     | 9.0608  |
| 3      | 55.812        | MM   | 2.5848      | 9731.87598   | 44.18242     | 41.5288 |
| 4      | 63.946        | MM   | 4.8931      | 9758.10840   | 33.23734     | 41.6408 |

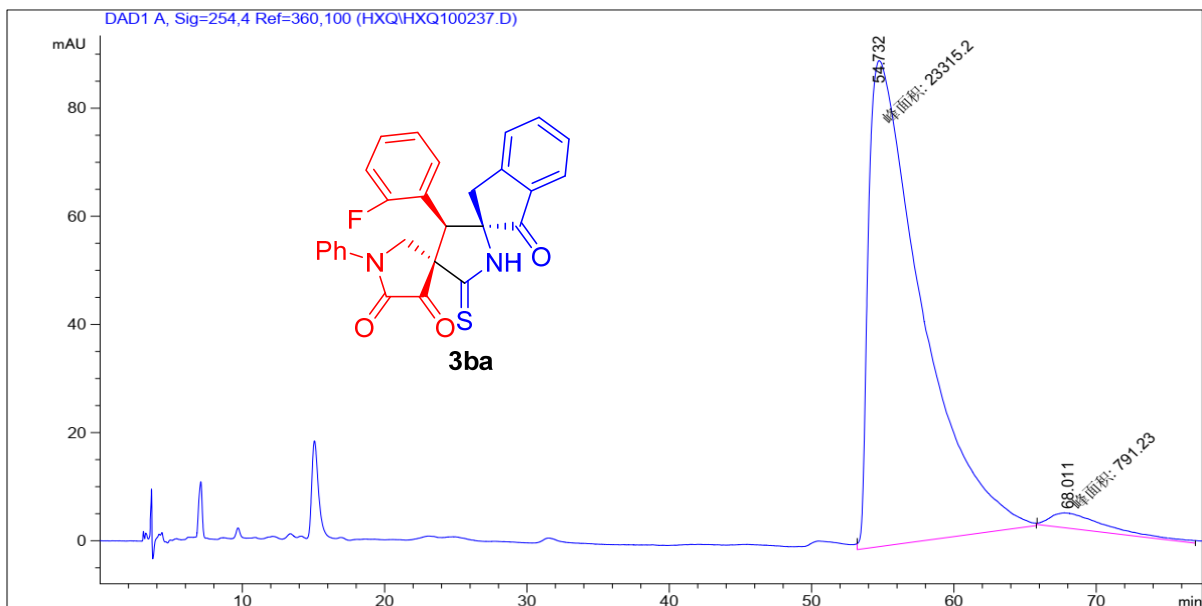

| Peak # | RetTime [min] | Type | Width [min] | Area [mAU*s] | Height [mAU] | Area %  |
|--------|---------------|------|-------------|--------------|--------------|---------|
| 1      | 54.732        | MM   | 4.3238      | 2.33152e4    | 89.87164     | 96.7178 |
| 2      | 68.011        | MM   | 4.7572      | 791.23035    | 2.77205      | 3.2822  |



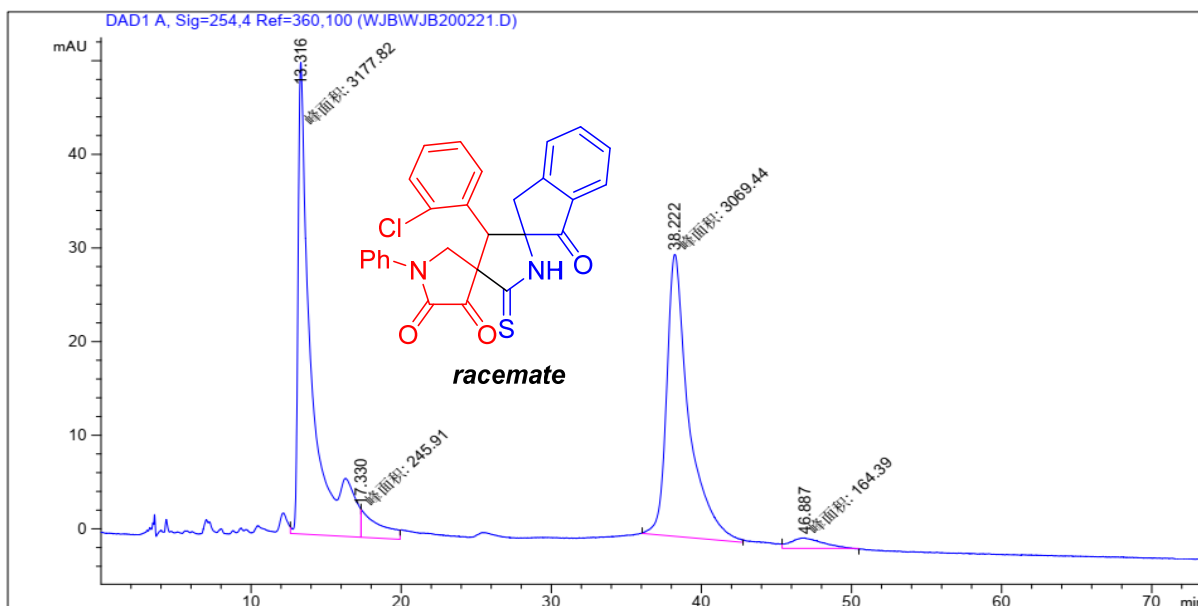

| Peak # | RetTime [min] | Type | Width [min] | Area [mAU*s] | Height [mAU] | Area %  |
|--------|---------------|------|-------------|--------------|--------------|---------|
| 1      | 13.316        | MF   | 1.0517      | 3177.82007   | 50.36149     | 47.7325 |
| 2      | 17.330        | FM   | 1.3670      | 245.91020    | 2.99811      | 3.6937  |
| 3      | 38.222        | MM   | 1.6997      | 3069.43701   | 30.09769     | 46.1046 |
| 4      | 46.887        | MM   | 2.4579      | 164.39032    | 1.11470      | 2.4692  |

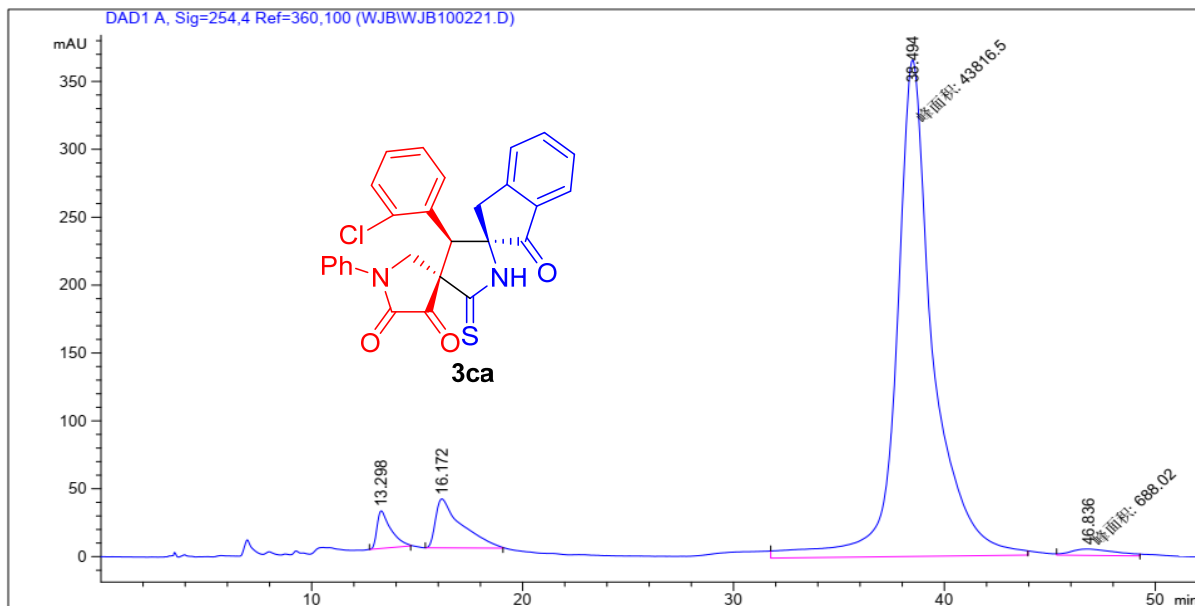

| Peak # | RetTime [min] | Type | Width [min] | Area [mAU*s] | Height [mAU] | Area %  |
|--------|---------------|------|-------------|--------------|--------------|---------|
| 1      | 13.298        | BB   | 0.6299      | 1256.66870   | 27.66854     | 2.5730  |
| 2      | 16.172        | BB   | 1.1270      | 3079.28052   | 36.03431     | 6.3048  |
| 3      | 38.494        | MM   | 1.9972      | 4.38165e4    | 365.65387    | 89.7135 |
| 4      | 46.836        | MM   | 2.4574      | 688.01984    | 4.66636      | 1.4087  |

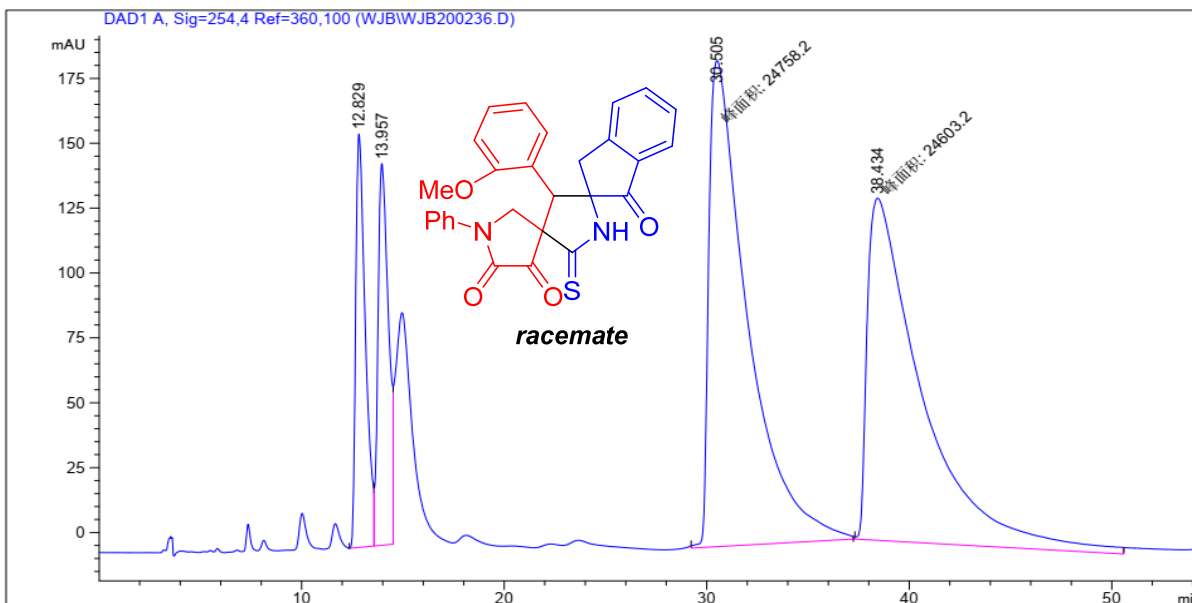

| Peak # | RetTime [min] | Type | Width [min] | Area [mAU*s] | Height [mAU] | Area %  |
|--------|---------------|------|-------------|--------------|--------------|---------|
| 1      | 12.829        | BV   | 0.4956      | 5293.69092   | 159.33244    | 8.8291  |
| 2      | 13.957        | VV   | 0.5487      | 5302.12256   | 147.04448    | 8.8432  |
| 3      | 30.505        | MM   | 2.2032      | 2.47582e4    | 187.28592    | 41.2931 |
| 4      | 38.434        | MM   | 3.1091      | 2.46032e4    | 131.88596    | 41.0346 |

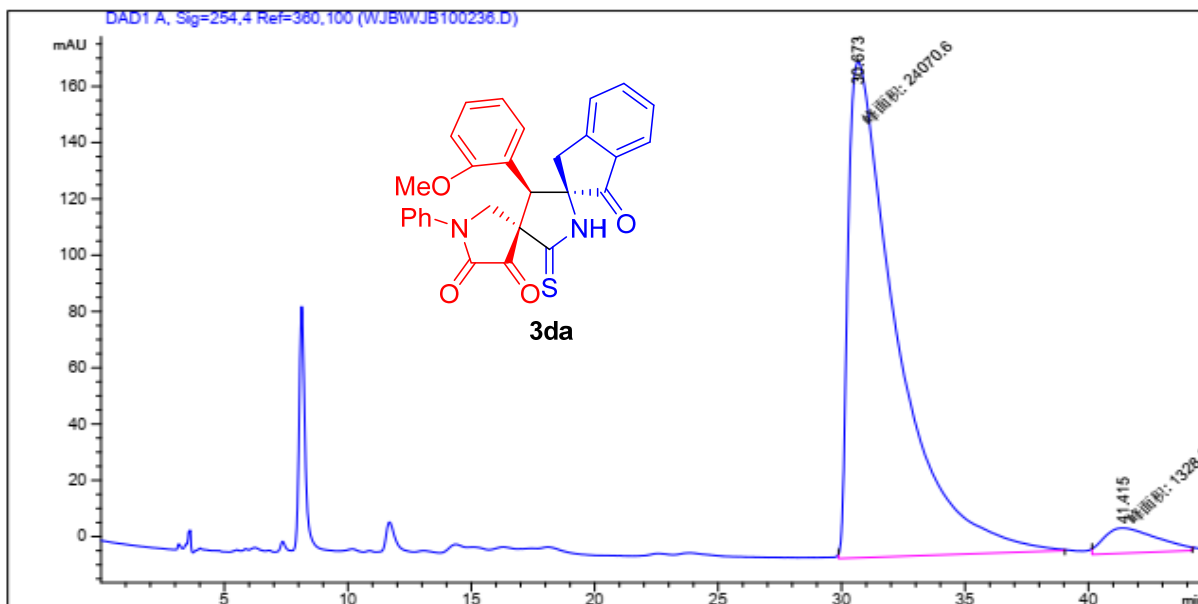

| Peak # | RetTime [min] | Type | Width [min] | Area [mAU*s] | Height [mAU] | Area %  |
|--------|---------------|------|-------------|--------------|--------------|---------|
| 1      | 30.673        | MM   | 2.2743      | 2.40706e4    | 176.39429    | 94.7680 |
| 2      | 41.415        | MM   | 2.4729      | 1328.91638   | 8.95640      | 5.2320  |

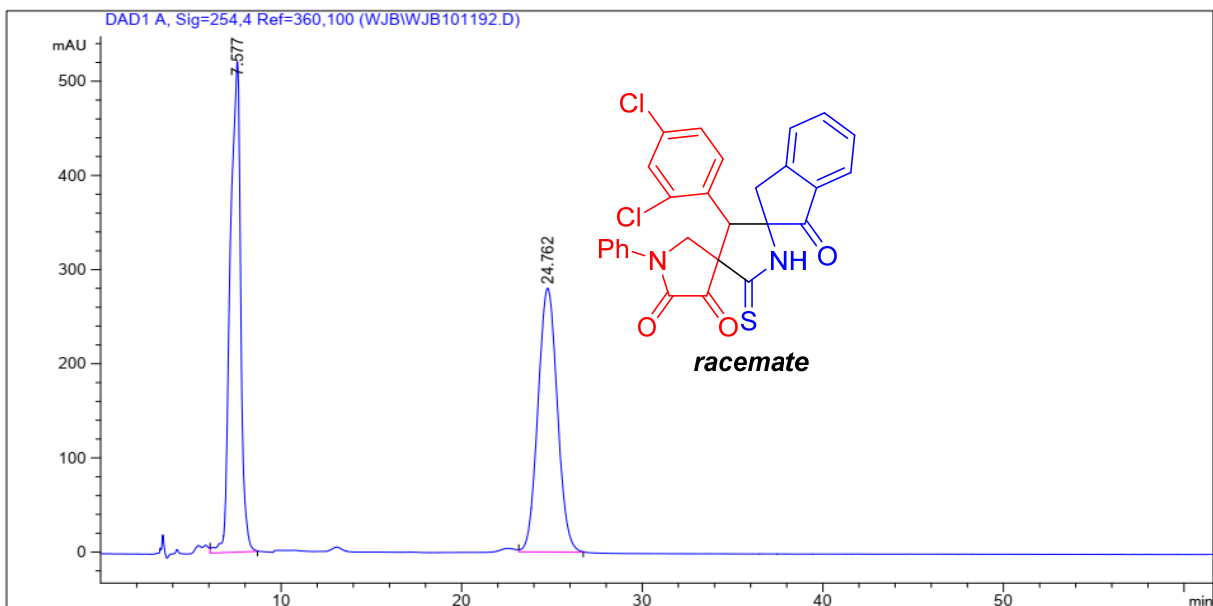

| Peak # | Ret Time [min] | Type | Width [min] | Area [mAU*s] | Height [mAU] | Area %  |
|--------|----------------|------|-------------|--------------|--------------|---------|
| 1      | 7.577          | VB   | 0.5445      | 2.09300e4    | 521.16418    | 50.0900 |
| 2      | 24.762         | VB   | 1.1302      | 2.08548e4    | 280.23947    | 49.9100 |

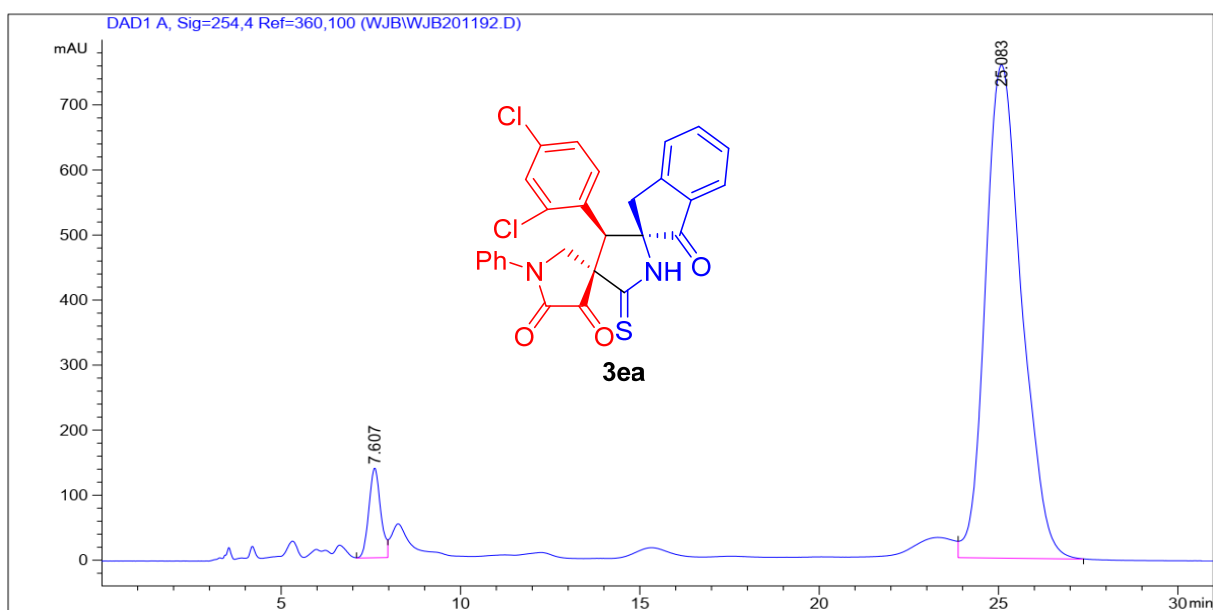

| Peak # | RetTime [min] | Type | Width [min] | Area [mAU*s] | Height [mAU] | Area %  |
|--------|---------------|------|-------------|--------------|--------------|---------|
| 1      | 7.607         | VV   | 0.3478      | 3137.69287   | 137.71315    | 5.5542  |
| 2      | 25.083        | VB   | 1.0546      | 5.33549e4    | 758.54907    | 94.4458 |

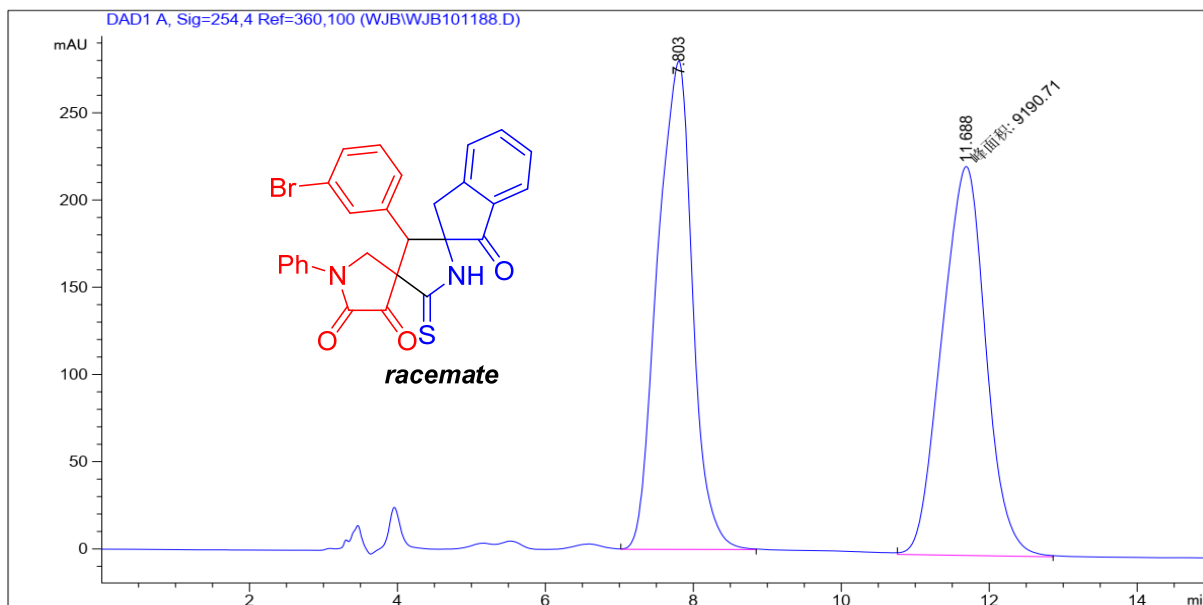

| Peak # | RetTime [min] | Type | Width [min] | Area [mAU*s] | Height [mAU] | Area %  |
|--------|---------------|------|-------------|--------------|--------------|---------|
| 1      | 7.803         | VB   | 0.5381      | 9214.88965   | 279.90295    | 50.0657 |
| 2      | 11.688        | MM   | 0.6870      | 9190.71484   | 222.96318    | 49.9343 |

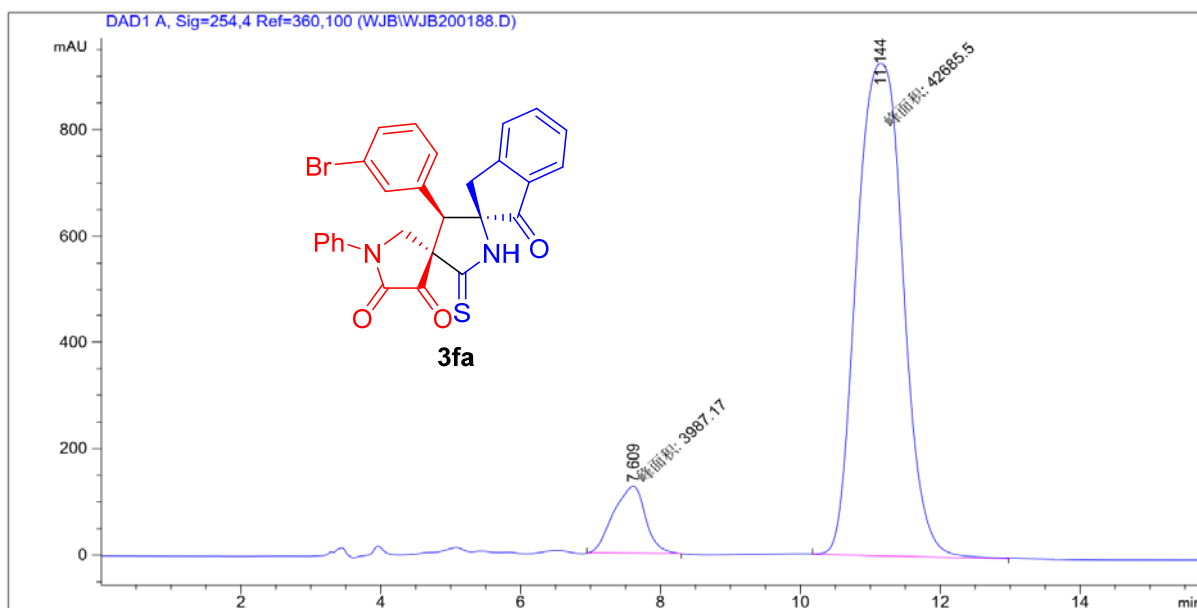

| Peak # | RetTime [min] | Type | Width [min] | Area [mAU*s] | Height [mAU] | Area %  |
|--------|---------------|------|-------------|--------------|--------------|---------|
| 1      | 7.609         | MM   | 0.5277      | 3987.16846   | 125.93576    | 8.5428  |
| 2      | 11.144        | MM   | 0.7685      | 4.26855e4    | 925.79041    | 91.4572 |

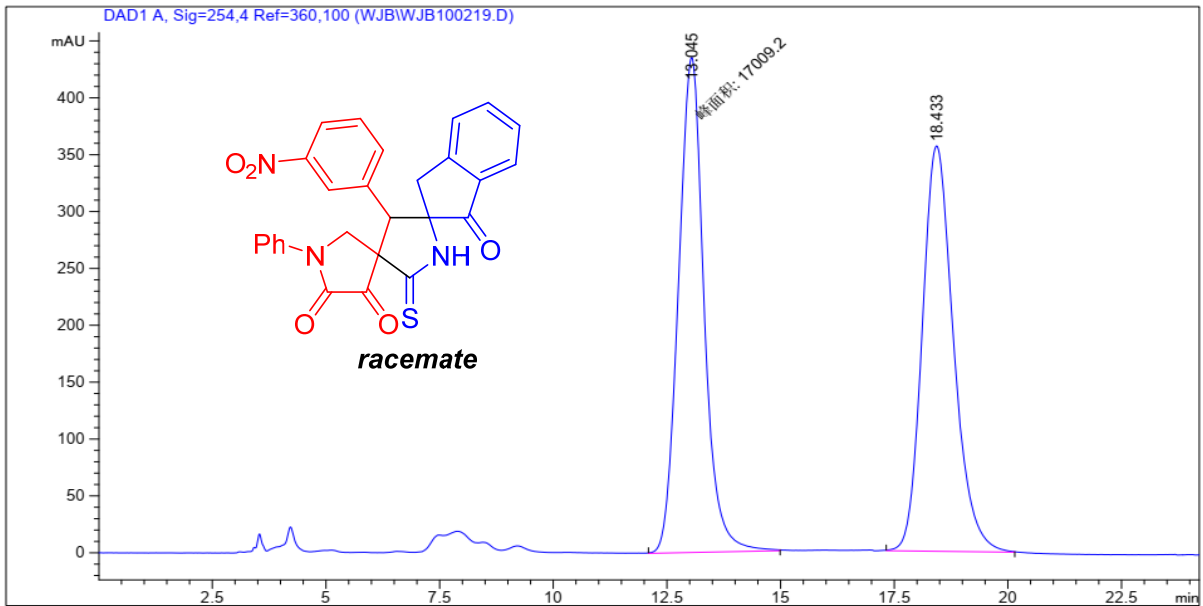

| Peak # | RetTime [min] | Type | Width [min] | Area [mAU*s] | Height [mAU] | Area %  |
|--------|---------------|------|-------------|--------------|--------------|---------|
| 1      | 13.045        | MM   | 0.6512      | 1.70092e4    | 435.32623    | 49.9898 |
| 2      | 18.433        | BB   | 0.7351      | 1.70162e4    | 356.33008    | 50.0102 |

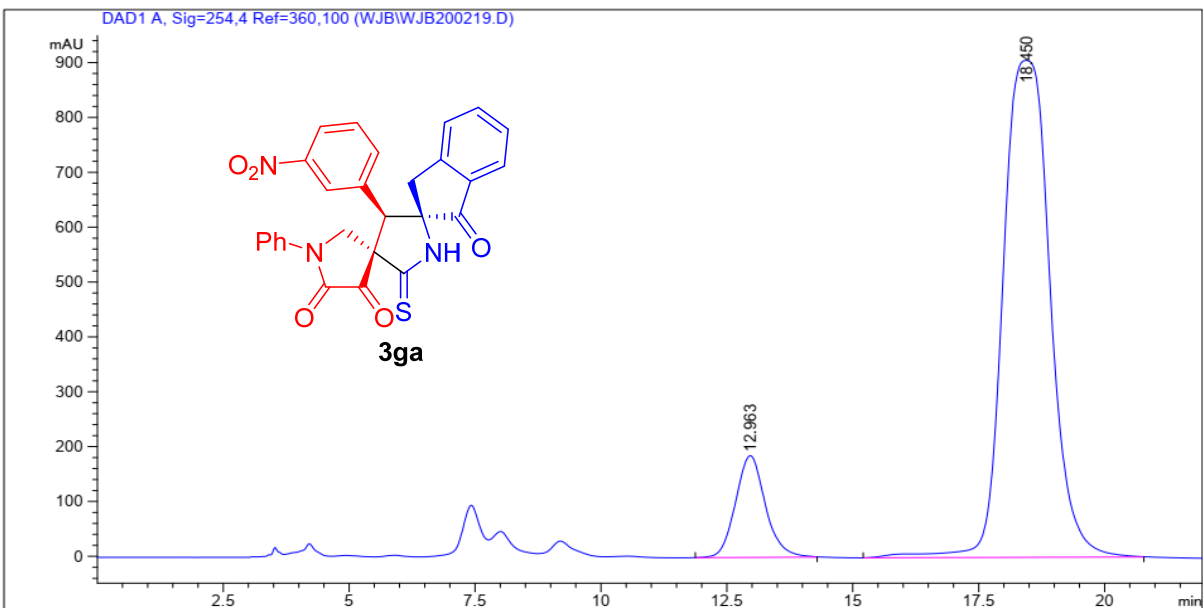

| Peak # | RetTime [min] | Type | Width [min] | Area [mAU*s] | Height [mAU] | Area %  |
|--------|---------------|------|-------------|--------------|--------------|---------|
| 1      | 12.963        | BB   | 0.6252      | 7652.33008   | 185.52492    | 11.5477 |
| 2      | 18.450        | BB   | 0.7690      | 5.86149e4    | 905.77319    | 88.4523 |

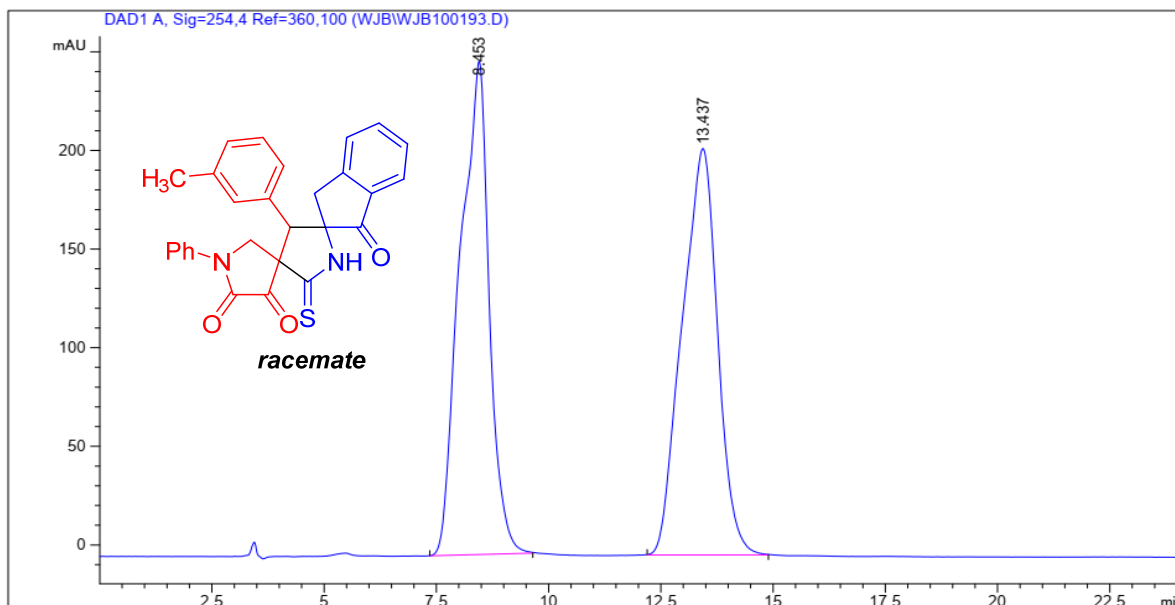

| Peak # | RetTime [min] | Type | Width [min] | Area [mAU*s] | Height [mAU] | Area %  |
|--------|---------------|------|-------------|--------------|--------------|---------|
| 1      | 8.453         | BB   | 0.6033      | 1.12569e4    | 250.02924    | 49.8972 |
| 2      | 13.437        | BB   | 0.7761      | 1.13033e4    | 206.01018    | 50.1028 |

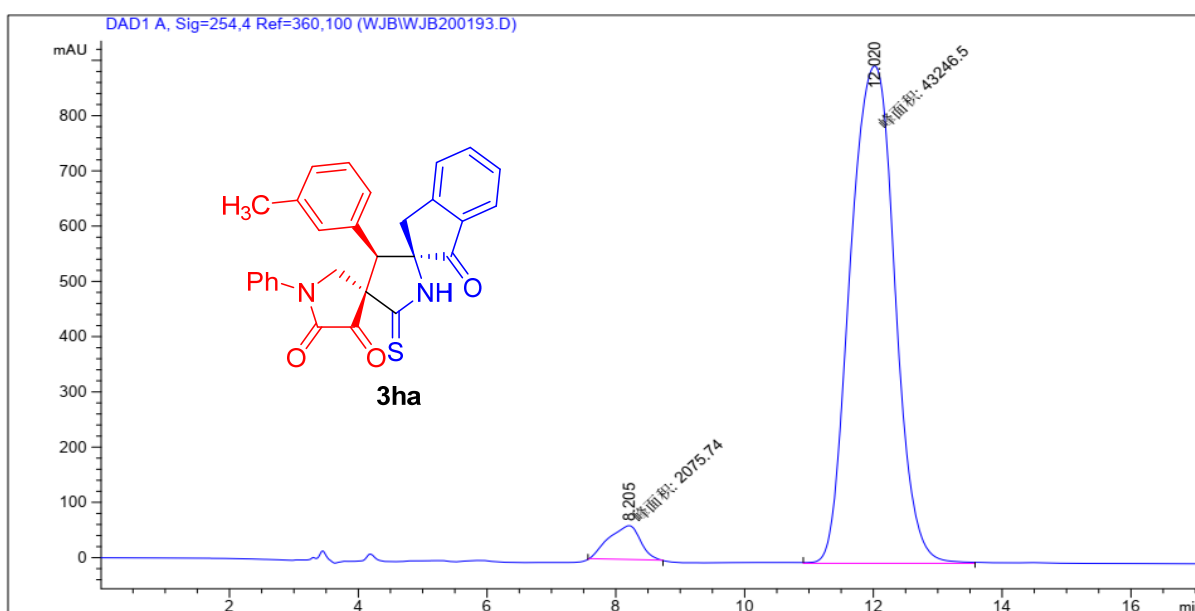

| Peak # | RetTime [min] | Type | Width [min] | Area [mAU*s] | Height [mAU] | Area %  |
|--------|---------------|------|-------------|--------------|--------------|---------|
| 1      | 8.205         | MM   | 0.5662      | 2075.73706   | 61.10561     | 4.5800  |
| 2      | 12.020        | MM   | 0.8006      | 4.32465e4    | 900.29565    | 95.4200 |

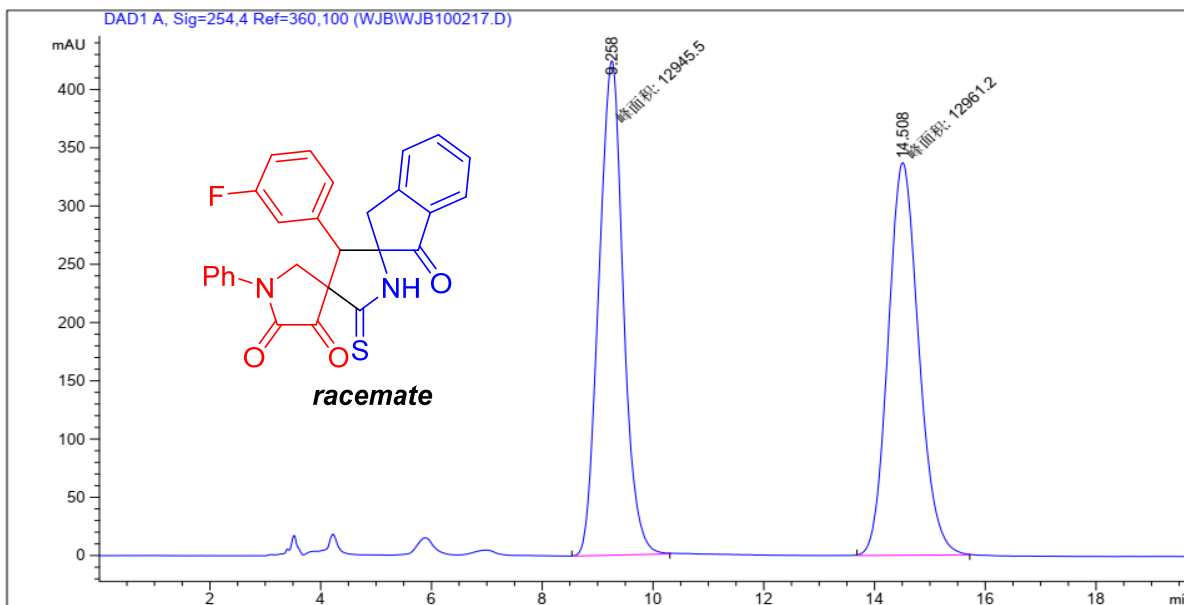

| Peak # | RetTime [min] | Type | Width [min] | Area [mAU*s] | Height [mAU] | Area %  |
|--------|---------------|------|-------------|--------------|--------------|---------|
| 1      | 9.258         | MM   | 0.5084      | 1.29455e4    | 424.35272    | 49.9697 |
| 2      | 14.508        | MM   | 0.6412      | 1.29612e4    | 336.89322    | 50.0303 |

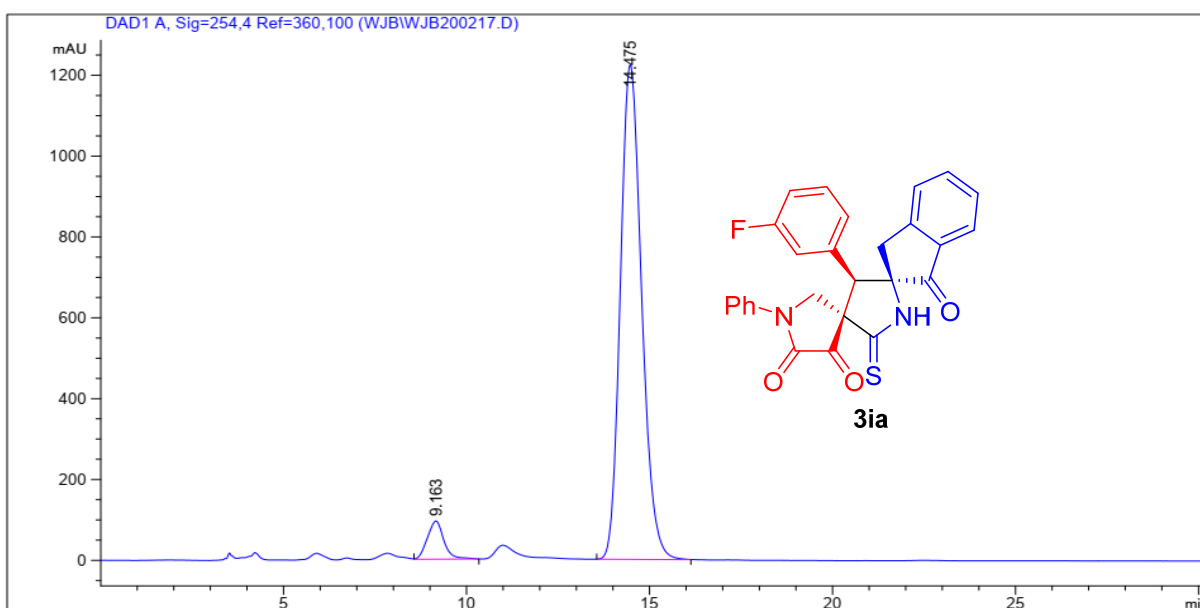

| Peak # | RetTime [min] | Type | Width [min] | Area [mAU*s] | Height [mAU] | Area %  |
|--------|---------------|------|-------------|--------------|--------------|---------|
| 1      | 9.163         | VB   | 0.4677      | 2966.26709   | 94.64110     | 5.6700  |
| 2      | 14.475        | BB   | 0.6208      | 4.93485e4    | 1223.00525   | 94.3300 |

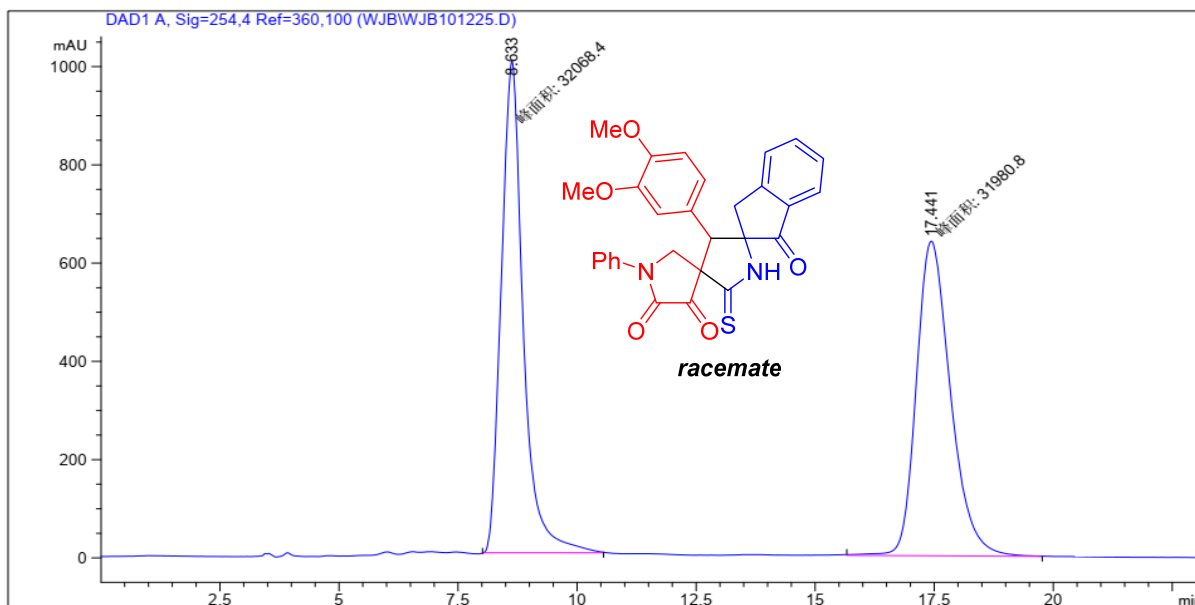

| Peak # | RetTime [min] | Type | Width [min] | Area [mAU*s] | Height [mAU] | Area %  |
|--------|---------------|------|-------------|--------------|--------------|---------|
| 1      | 8.633         | MM   | 0.5345      | 3.20684e4    | 1000.03088   | 50.0684 |
| 2      | 17.441        | MM   | 0.8323      | 3.19808e4    | 640.41376    | 49.9316 |

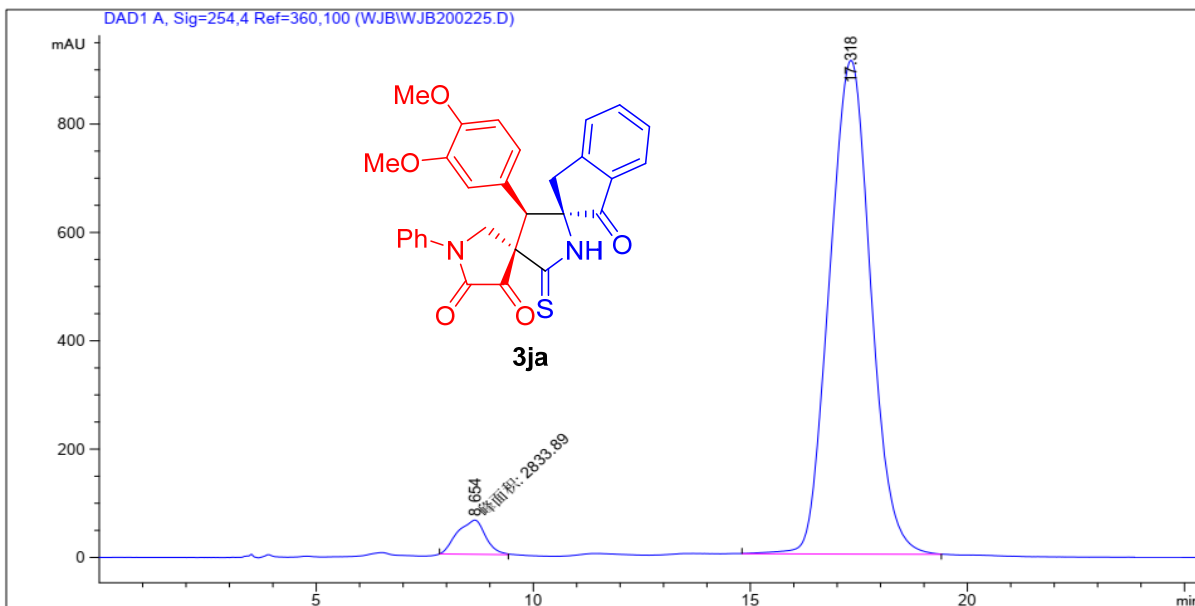

| Peak # | RetTime [min] | Type | Width [min] | Area [mAU*s] | Height [mAU] | Area %  |
|--------|---------------|------|-------------|--------------|--------------|---------|
| 1      | 8.654         | MM   | 0.7480      | 2833.88818   | 63.14351     | 4.4893  |
| 2      | 17.318        | BB   | 0.8798      | 6.02910e4    | 911.33118    | 95.5107 |



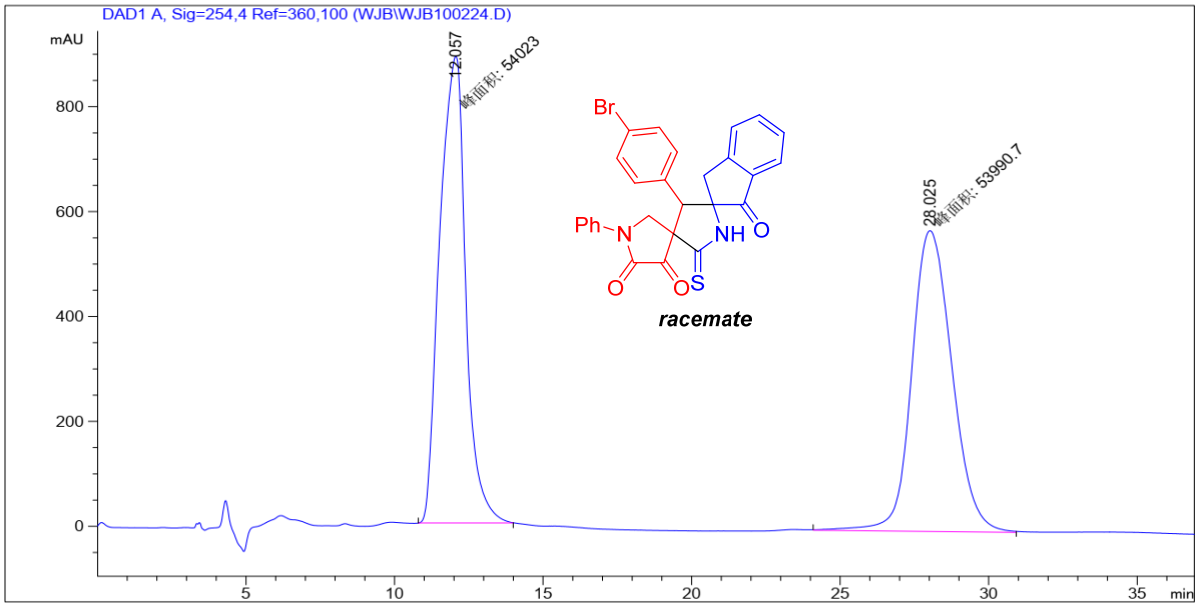

| Peak # | RetTime [min] | Type | Width [min] | Area [mAU*s] | Height [mAU] | Area %  |
|--------|---------------|------|-------------|--------------|--------------|---------|
| 1      | 12.057        | MM   | 1.0114      | 5.40230e4    | 890.22241    | 50.0149 |
| 2      | 28.025        | MM   | 1.5690      | 5.39907e4    | 573.53198    | 49.9851 |

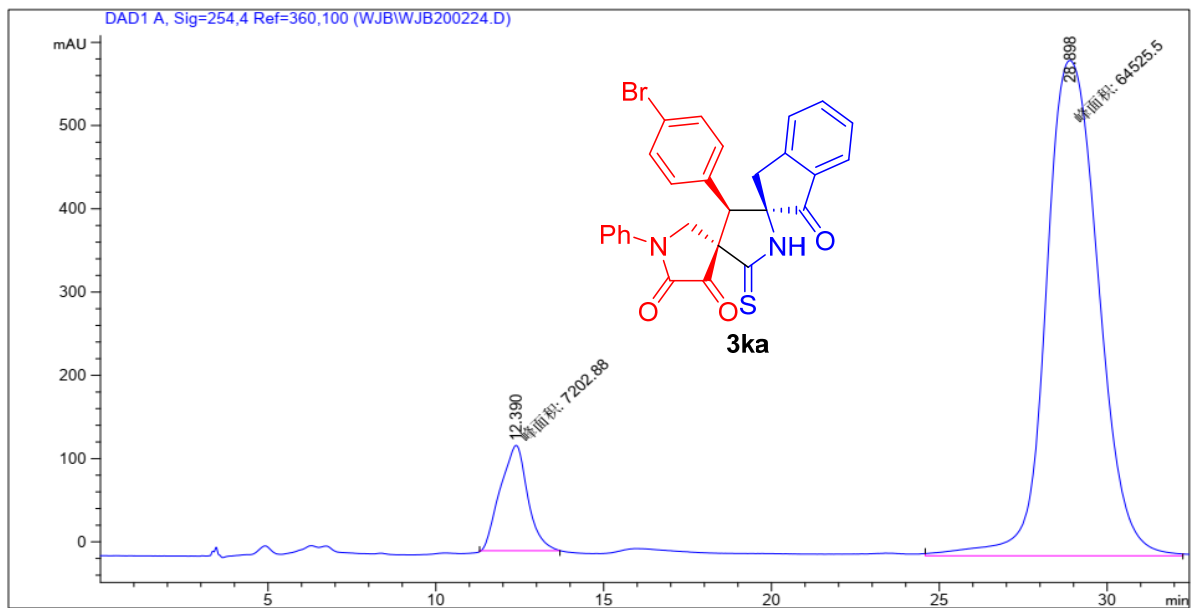

| Peak # | RetTime [min] | Type | Width [min] | Area [mAU*s] | Height [mAU] | Area %  |
|--------|---------------|------|-------------|--------------|--------------|---------|
| 1      | 12.390        | MM   | 0.9486      | 7202.88135   | 126.55871    | 10.0419 |
| 2      | 28.898        | MM   | 1.8070      | 6.45255e4    | 595.15997    | 89.9581 |

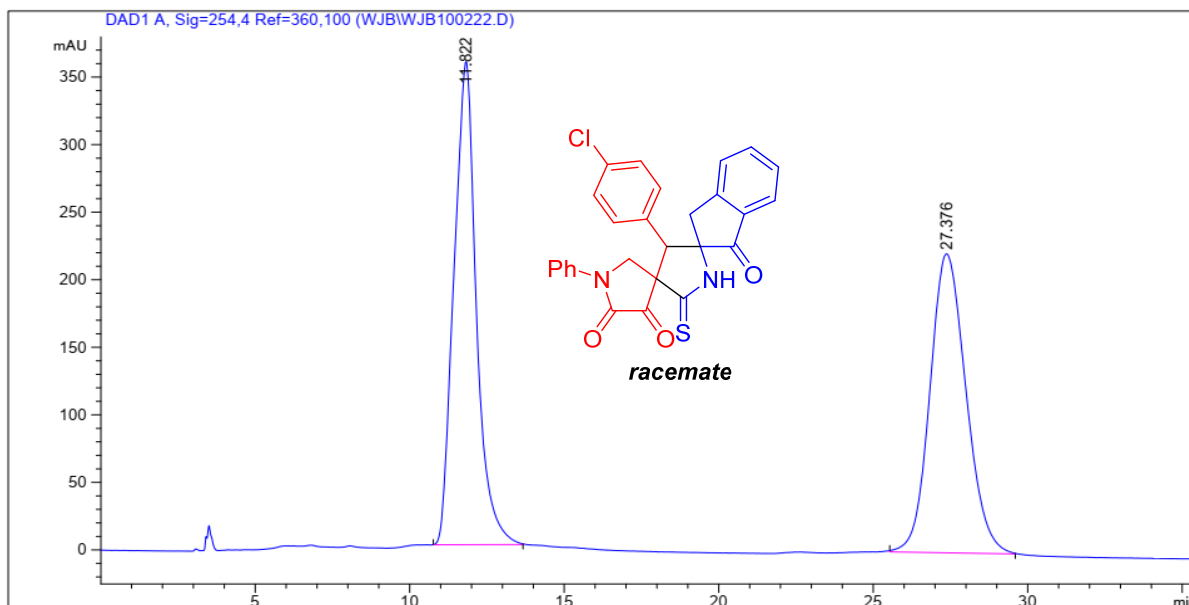

| Peak # | RetTime [min] | Type | Width [min] | Area [mAU*s] | Height [mAU] | Area %  |
|--------|---------------|------|-------------|--------------|--------------|---------|
| 1      | 11.822        | BB   | 0.7187      | 1.79832e4    | 357.61075    | 50.0750 |
| 2      | 27.376        | BB   | 1.1352      | 1.79293e4    | 221.30309    | 49.9250 |

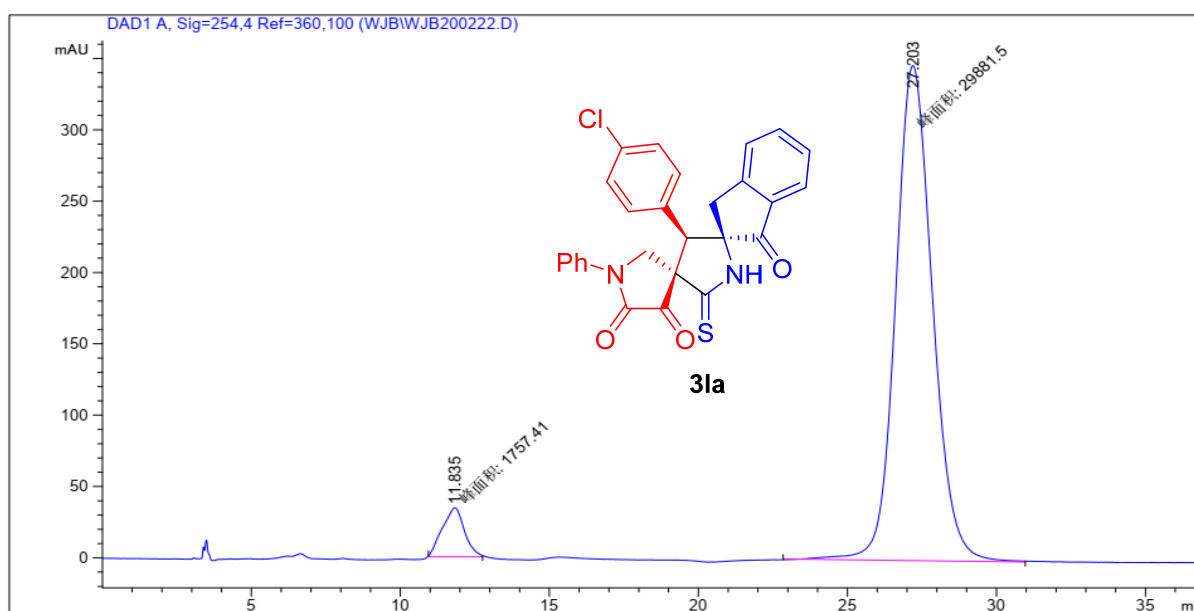

| Peak # | RetTime [min] | Type | Width [min] | Area [mAU*s] | Height [mAU] | Area %  |
|--------|---------------|------|-------------|--------------|--------------|---------|
| 1      | 11.835        | MM   | 0.8552      | 1757.40564   | 34.24881     | 5.5546  |
| 2      | 27.203        | MM   | 1.4357      | 2.98815e4    | 346.88812    | 94.4454 |

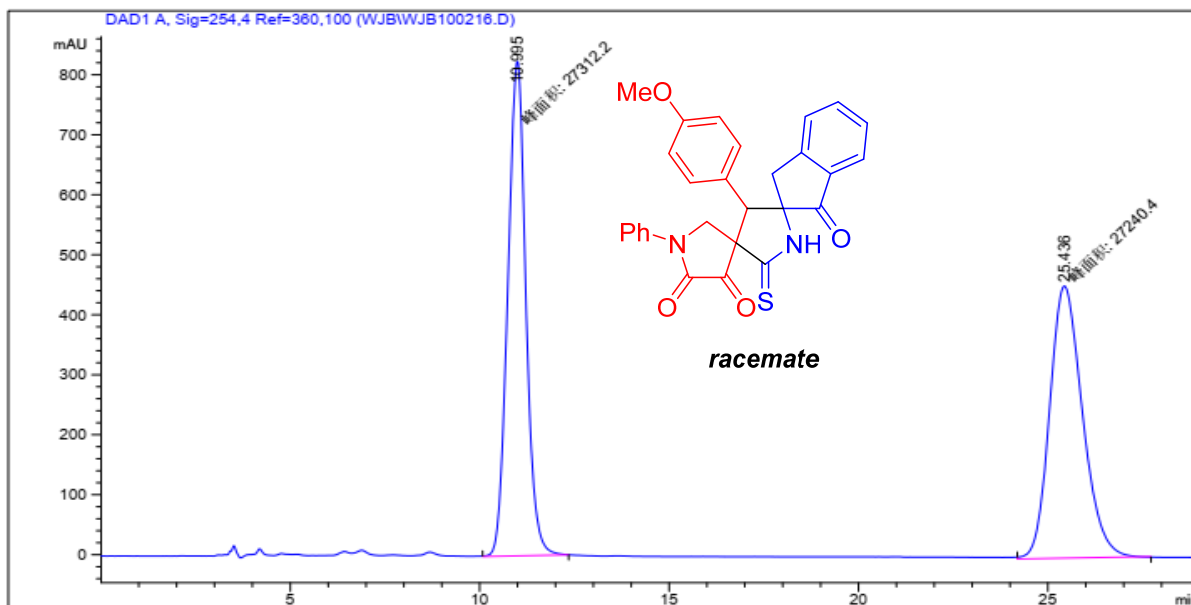

| Peak # | RetTime [min] | Type | Width [min] | Area [mAU*s] | Height [mAU] | Area %  |
|--------|---------------|------|-------------|--------------|--------------|---------|
| 1      | 10.995        | MM   | 0.5522      | 2.73122e4    | 824.37488    | 50.0657 |
| 2      | 25.436        | MM   | 1.0010      | 2.72404e4    | 453.54199    | 49.9343 |

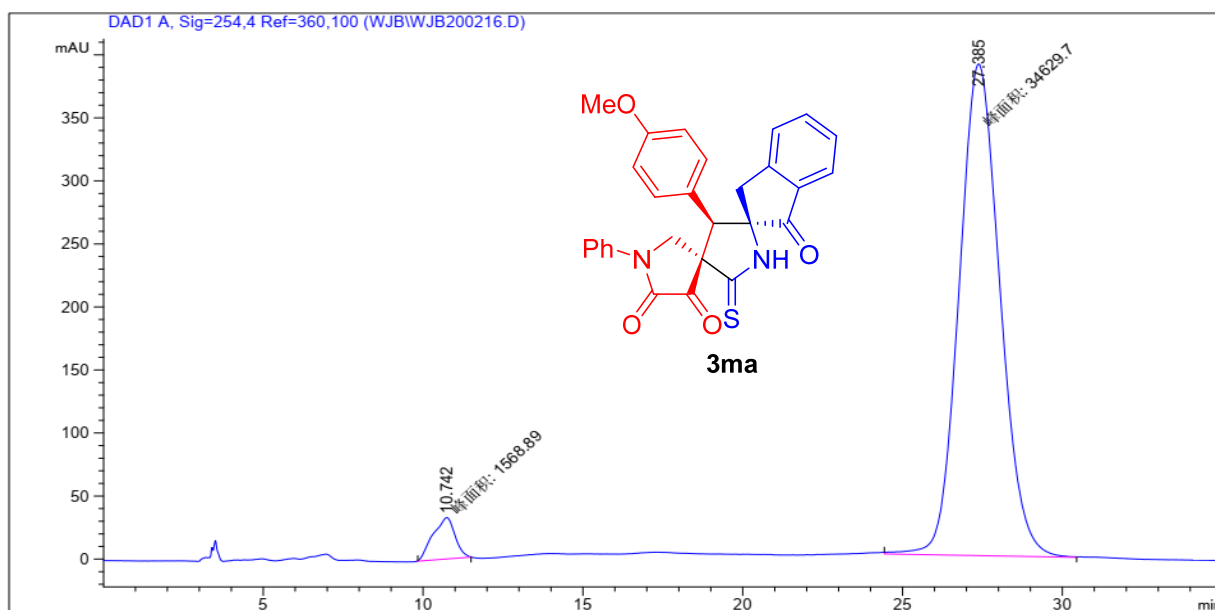

| Peak # | RetTime [min] | Type | Width [min] | Area [mAU*s] | Height [mAU] | Area %  |
|--------|---------------|------|-------------|--------------|--------------|---------|
| 1      | 10.742        | MM   | 0.7973      | 1568.88977   | 32.79636     | 4.3341  |
| 2      | 27.385        | MM   | 1.4798      | 3.46297e4    | 390.03867    | 95.6659 |

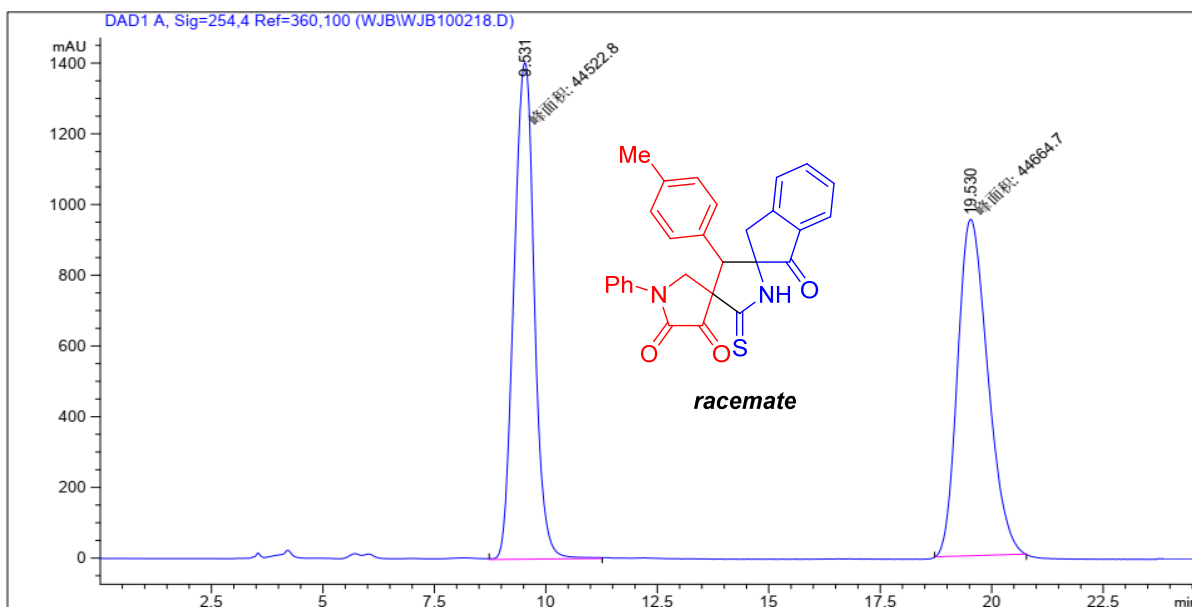

| Peak # | RetTime [min] | Type | Width [min] | Area [mAU*s] | Height [mAU] | Area %  |
|--------|---------------|------|-------------|--------------|--------------|---------|
| 1      | 9.531         | MM   | 0.5283      | 4.45228e4    | 1404.59973   | 49.9204 |
| 2      | 19.530        | MM   | 0.7820      | 4.46647e4    | 951.92371    | 50.0796 |

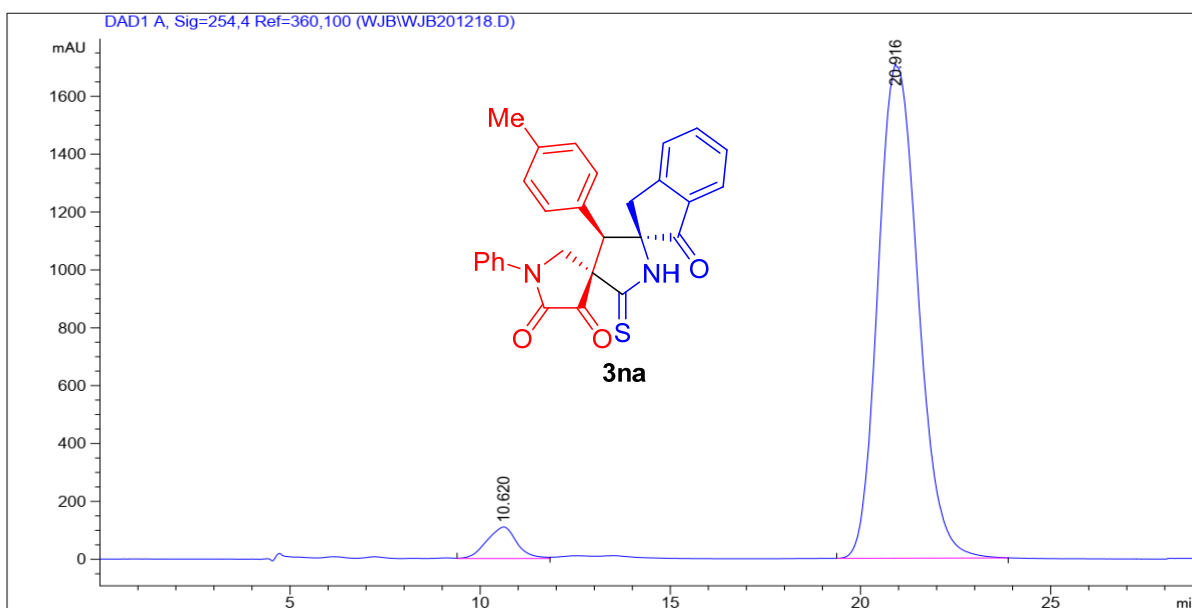

| Peak # | RetTime [min] | Type | Width [min] | Area [mAU*s] | Height [mAU] | Area %  |
|--------|---------------|------|-------------|--------------|--------------|---------|
| 1      | 10.620        | VV   | 0.7746      | 5979.69873   | 108.90514    | 4.5817  |
| 2      | 20.916        | BB   | 0.8623      | 1.24532e5    | 1708.62732   | 95.4183 |

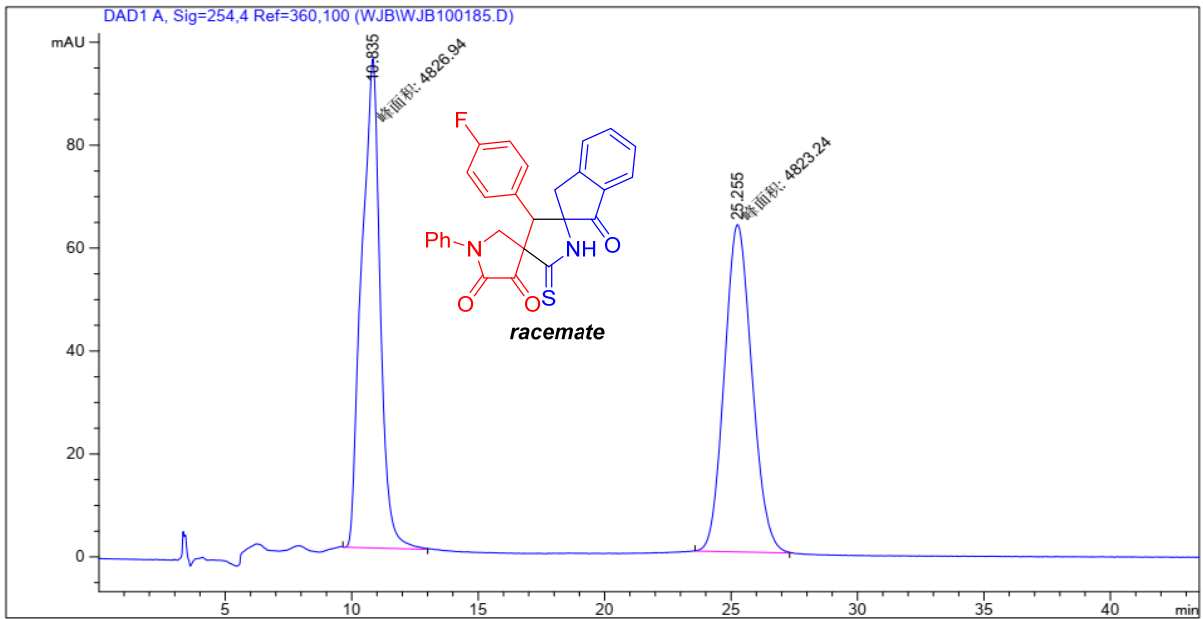

| Peak # | RetTime [min] | Type | Width [min] | Area [mAU*s] | Height [mAU] | Area %  |
|--------|---------------|------|-------------|--------------|--------------|---------|
| 1      | 10.835        | MM   | 0.8461      | 4826.94434   | 95.08164     | 50.0192 |
| 2      | 25.255        | MM   | 1.2637      | 4823.23535   | 63.61287     | 49.9808 |

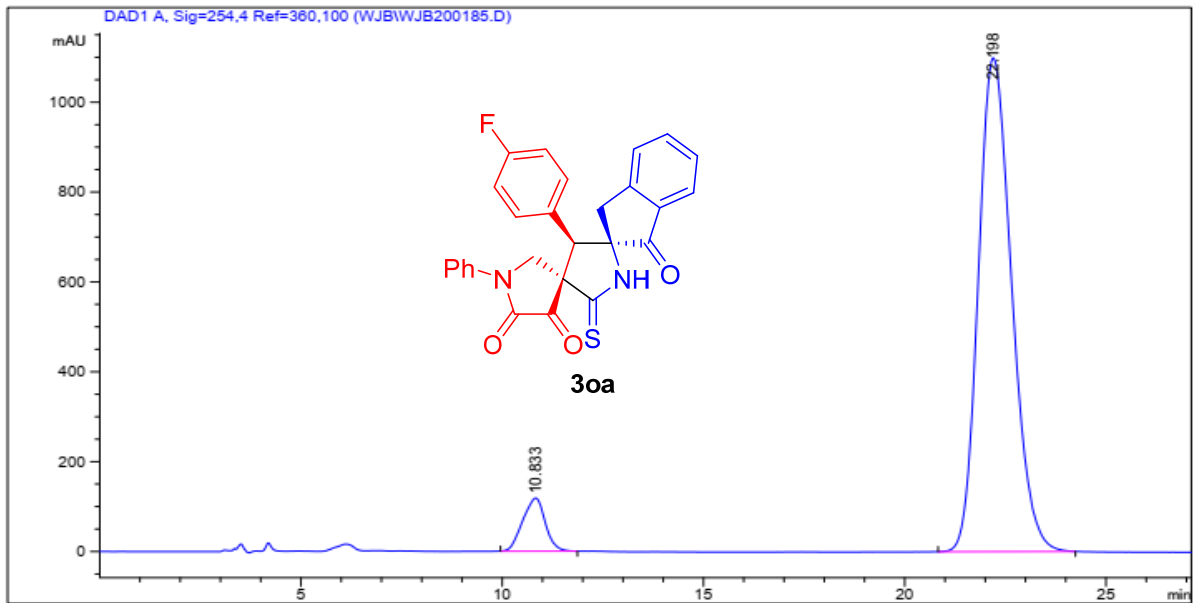

| Peak # | RetTime [min] | Type | Width [min] | Area [mAU*s] | Height [mAU] | Area %  |
|--------|---------------|------|-------------|--------------|--------------|---------|
| 1      | 10.833        | BB   | 0.5683      | 4602.51367   | 118.19185    | 6.8030  |
| 2      | 22.198        | BB   | 0.8795      | 6.30518e4    | 1098.80945   | 93.1970 |

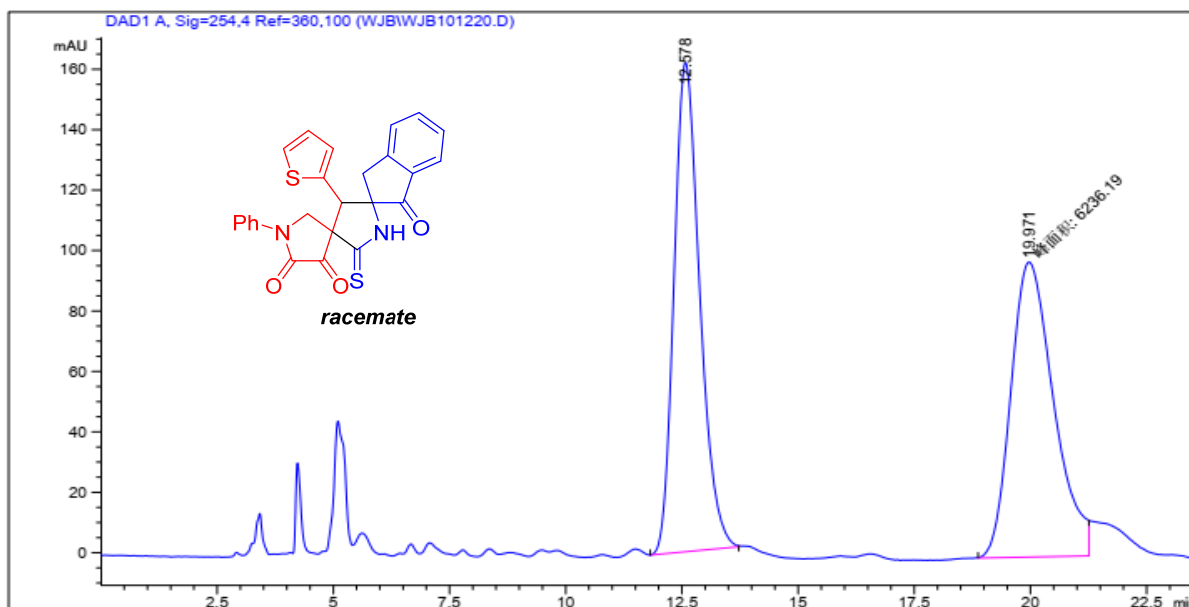

| Peak # | RetTime [min] | Type | Width [min] | Area [mAU*s] | Height [mAU] | Area %  |
|--------|---------------|------|-------------|--------------|--------------|---------|
| 1      | 12.578        | VB   | 0.5848      | 6225.21680   | 161.84186    | 49.9560 |
| 2      | 19.971        | MF   | 1.0646      | 6236.19092   | 97.62936     | 50.0440 |

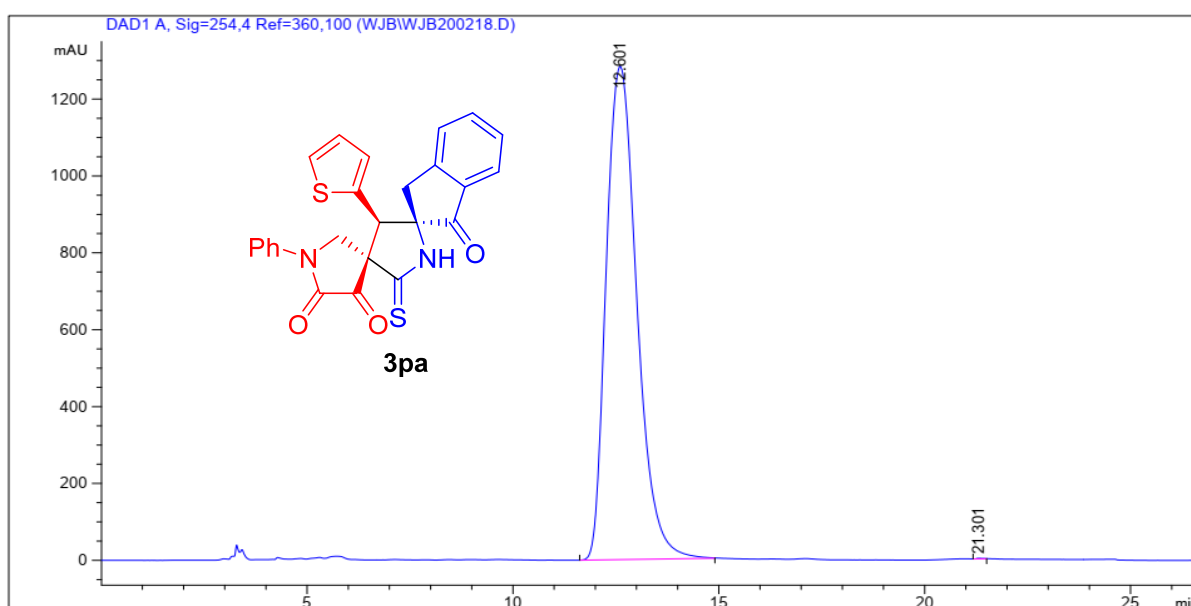

| Peak # | RetTime [min] | Type | Width [min] | Area [mAU*s] | Height [mAU] | Area %  |
|--------|---------------|------|-------------|--------------|--------------|---------|
| 1      | 12.601        | BB   | 0.8112      | 6.63796e4    | 1283.77661   | 99.9761 |
| 2      | 21.301        | BB   | 0.1411      | 15.87580     | 1.45771      | 0.0239  |

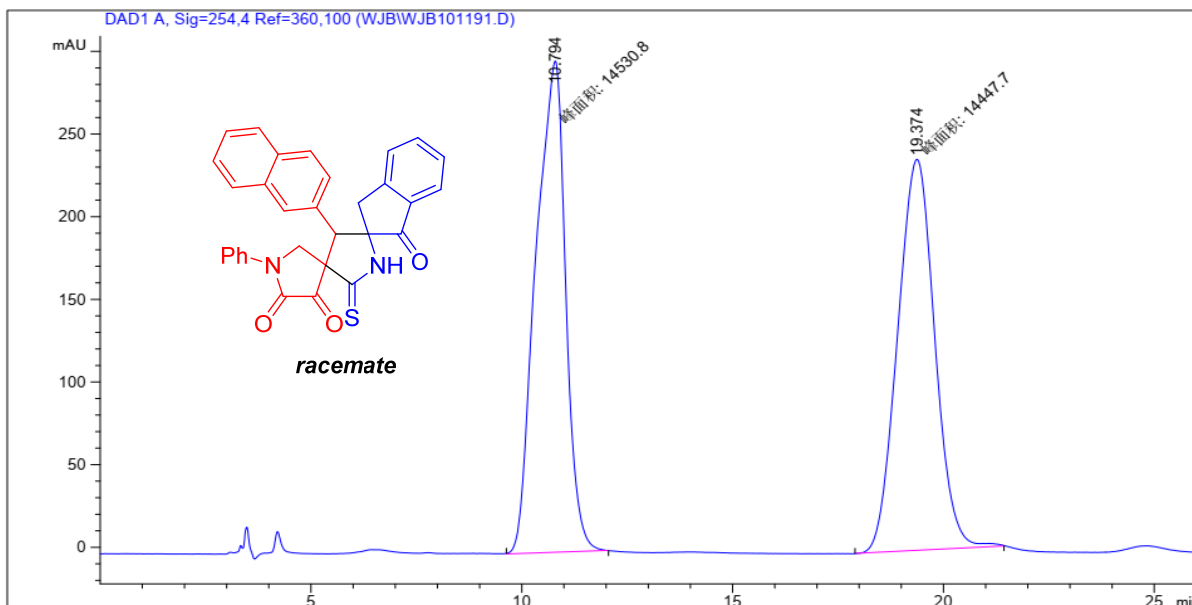

| Peak # | RetTime [min] | Type | Width [min] | Area [mAU*s] | Height [mAU] | Area %  |
|--------|---------------|------|-------------|--------------|--------------|---------|
| 1      | 10.794        | MM   | 0.8150      | 1.45308e4    | 297.13846    | 50.1434 |
| 2      | 19.374        | MM   | 1.0180      | 1.44477e4    | 236.53587    | 49.8566 |

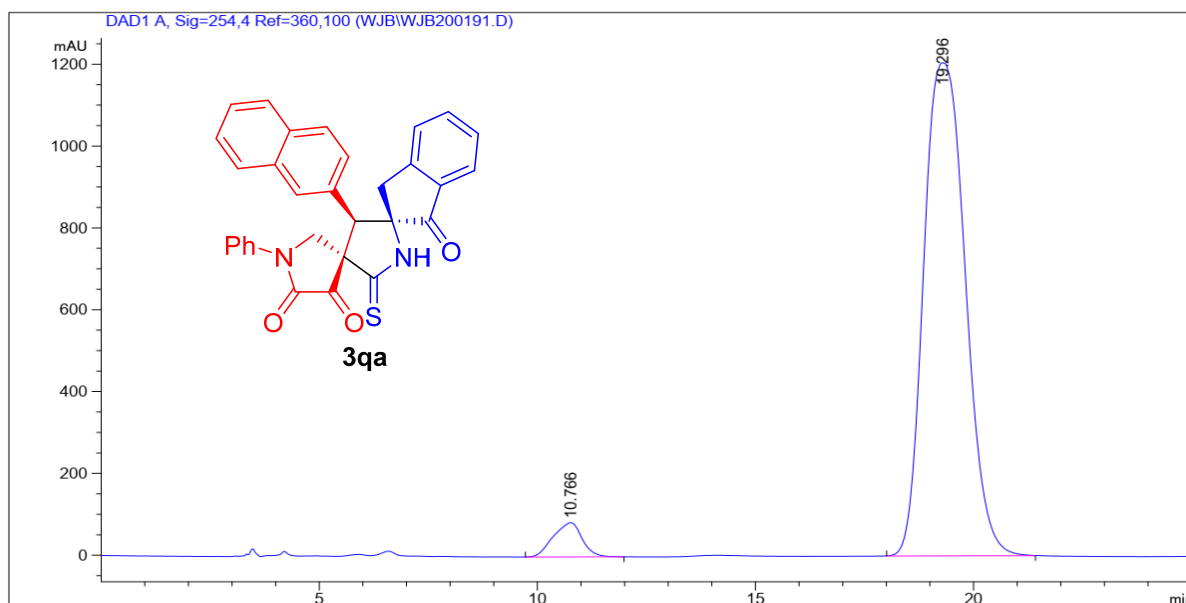

| Peak # | RetTime [min] | Type | Width [min] | Area [mAU*s] | Height [mAU] | Area %  |
|--------|---------------|------|-------------|--------------|--------------|---------|
| 1      | 10.766        | BB   | 0.6415      | 3844.32056   | 83.75391     | 4.5987  |
| 2      | 19.296        | BB   | 0.7781      | 7.97523e4    | 1205.03979   | 95.4013 |

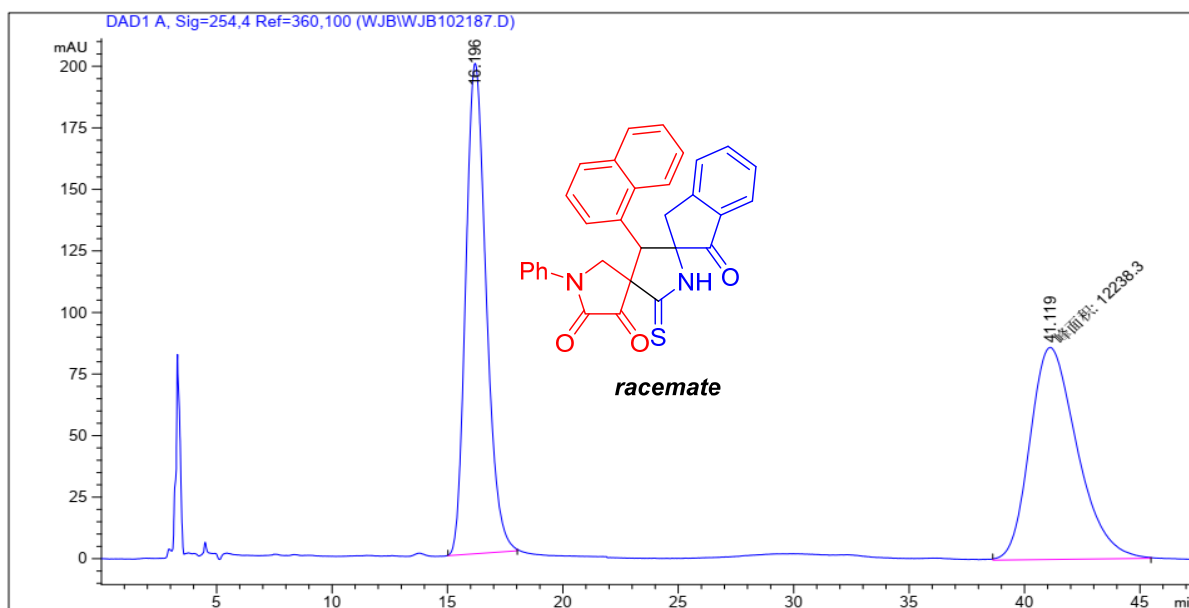

| Peak # | RetTime [min] | Type | Width [min] | Area [mAU*s] | Height [mAU] | Area %  |
|--------|---------------|------|-------------|--------------|--------------|---------|
| 1      | 16.196        | BB   | 0.9349      | 1.22392e4    | 199.18182    | 50.0019 |
| 2      | 41.119        | MM   | 2.3672      | 1.22383e4    | 86.16573     | 49.9981 |

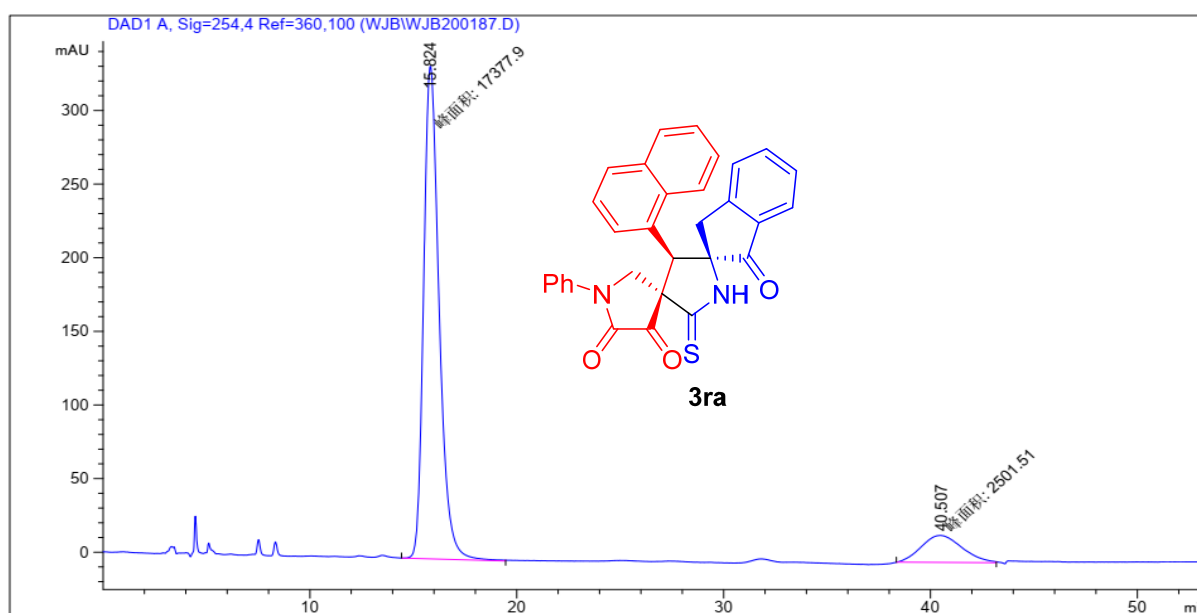

| Peak # | RetTime [min] | Type | Width [min] | Area [mAU*s] | Height [mAU] | Area %  |
|--------|---------------|------|-------------|--------------|--------------|---------|
| 1      | 15.824        | MM   | 0.8659      | 1.73779e4    | 334.48795    | 87.4165 |
| 2      | 40.507        | MM   | 2.2765      | 2501.51392   | 18.31381     | 12.5835 |



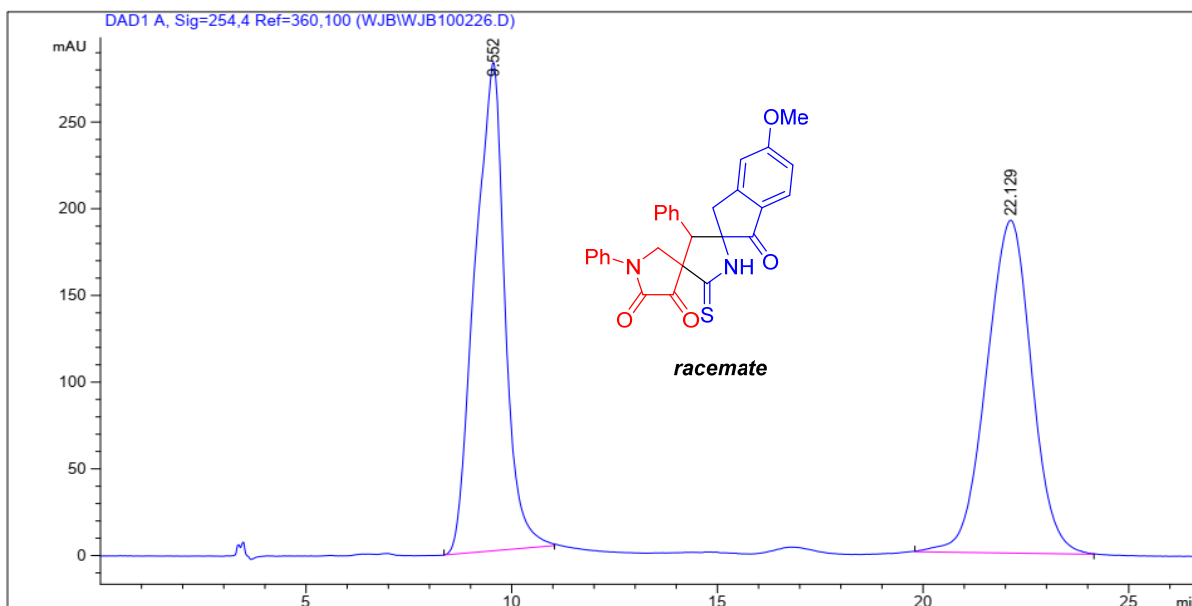

| Peak # | RetTime [min] | Type | Width [min] | Area [mAU*s] | Height [mAU] | Area %  |
|--------|---------------|------|-------------|--------------|--------------|---------|
| 1      | 9.552         | BB   | 0.6892      | 1.42222e4    | 281.61249    | 49.2431 |
| 2      | 22.129        | BB   | 1.0673      | 1.46594e4    | 191.88948    | 50.7569 |

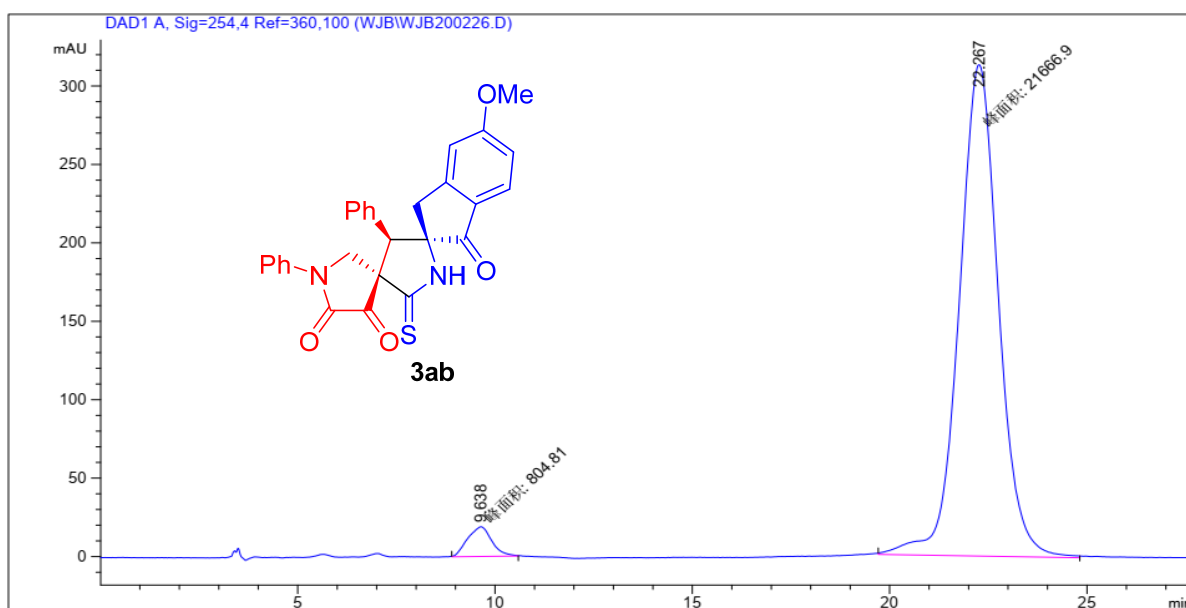

| Peak # | RetTime [min] | Type | Width [min] | Area [mAU*s] | Height [mAU] | Area %  |
|--------|---------------|------|-------------|--------------|--------------|---------|
| 1      | 9.638         | MM   | 0.7100      | 804.80969    | 18.89320     | 3.5814  |
| 2      | 22.267        | MM   | 1.1528      | 2.16669e4    | 313.25269    | 96.4186 |

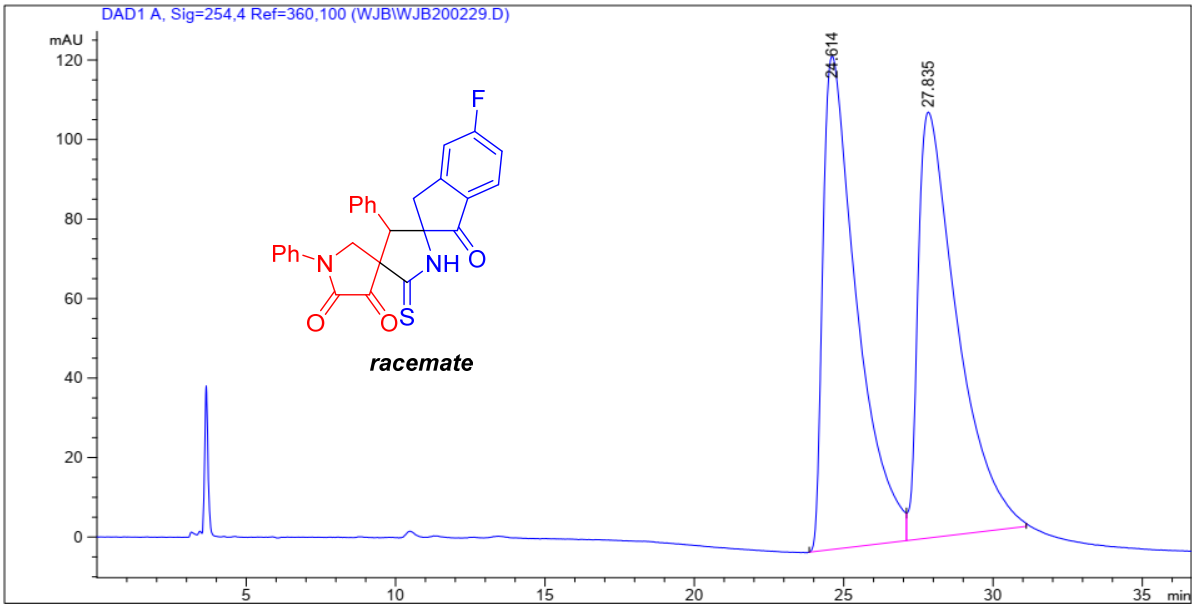

| Peak # | Ret Time [min] | Type | Width [min] | Area [mAU*s] | Height [mAU] | Area %  |
|--------|----------------|------|-------------|--------------|--------------|---------|
| 1      | 24.614         | BB   | 1.0924      | 9791.14648   | 124.10841    | 49.9833 |
| 2      | 27.835         | BB   | 1.2128      | 9797.70801   | 107.14769    | 50.0167 |

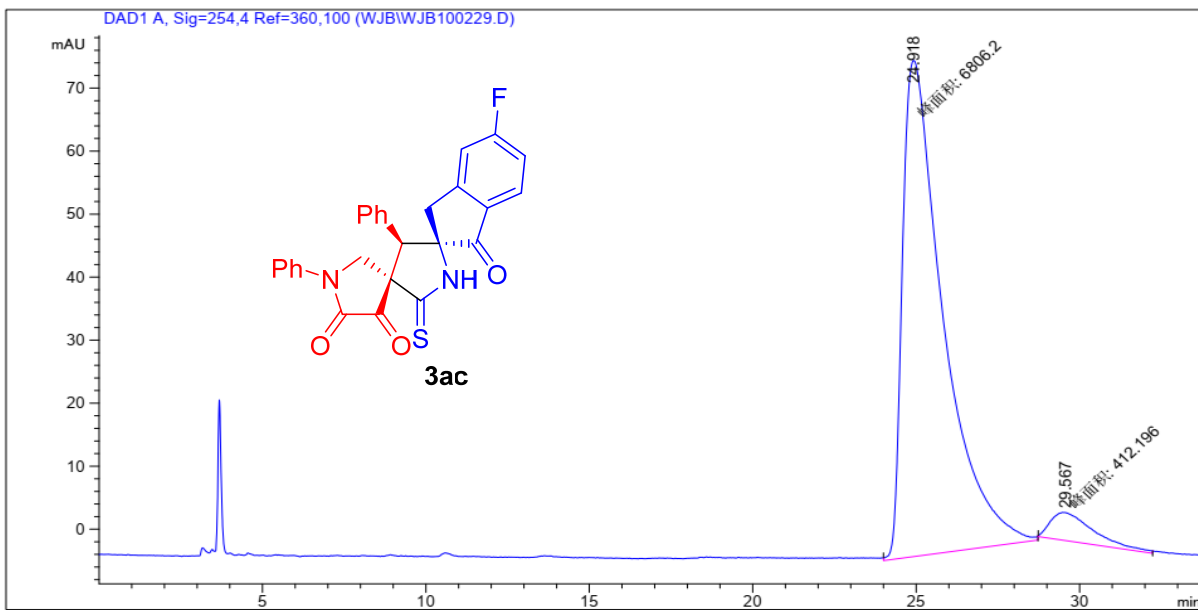

| Peak # | RetTime [min] | Type | Width [min] | Area [mAU*s] | Height [mAU] | Area %  |
|--------|---------------|------|-------------|--------------|--------------|---------|
| 1      | 24.918        | MM   | 1.4405      | 6806.19824   | 78.75037     | 94.2896 |
| 2      | 29.567        | MM   | 1.5468      | 412.19559    | 4.44124      | 5.7104  |

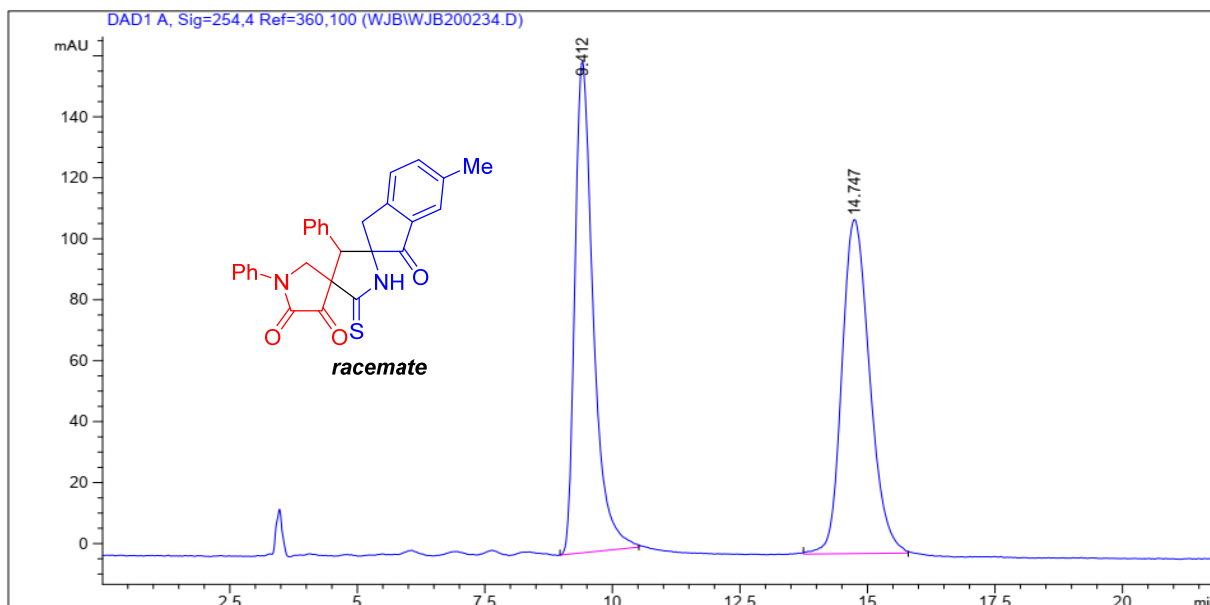

| Peak # | RetTime [min] | Type | Width [min] | Area [mAU*s] | Height [mAU] | Area %  |
|--------|---------------|------|-------------|--------------|--------------|---------|
| 1      | 9.412         | BB   | 0.3803      | 4036.21558   | 161.10580    | 49.2992 |
| 2      | 14.747        | BB   | 0.5859      | 4150.96289   | 109.59423    | 50.7008 |

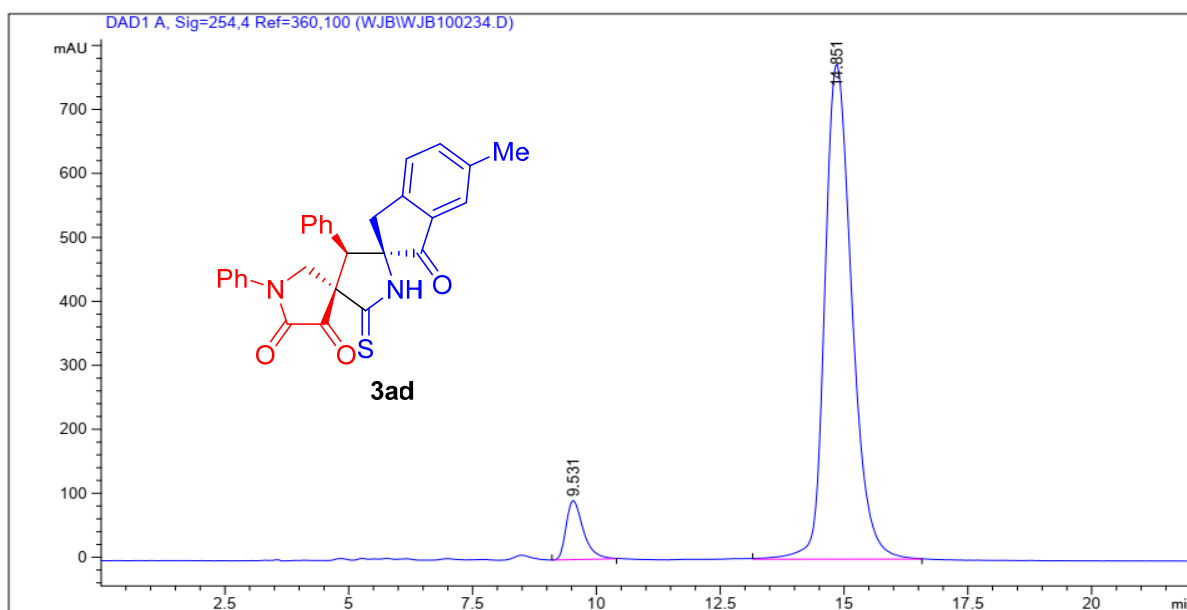

| Peak # | RetTime [min] | Type | Width [min] | Area [mAU*s] | Height [mAU] | Area %  |
|--------|---------------|------|-------------|--------------|--------------|---------|
| 1      | 9.531         | VB   | 0.3698      | 2225.45435   | 92.13474     | 7.0240  |
| 2      | 14.851        | BB   | 0.5784      | 2.94582e4    | 773.42804    | 92.9760 |

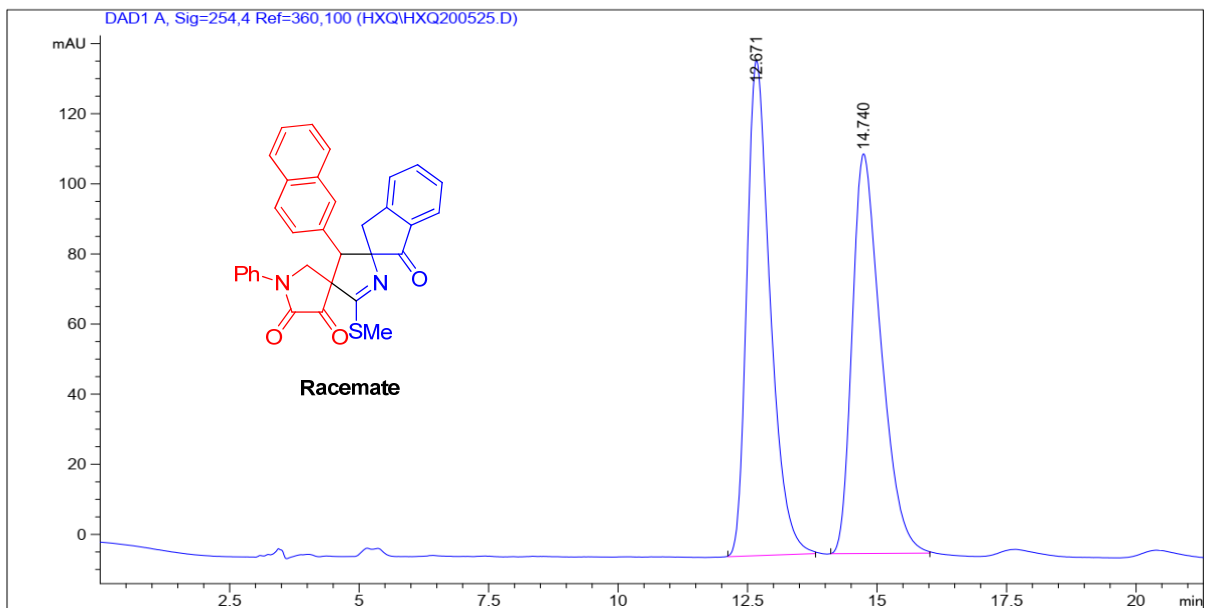

| Peak # | RetTime [min] | Type | Width [min] | Area [mAU*s] | Height [mAU] | Area %  |
|--------|---------------|------|-------------|--------------|--------------|---------|
| 1      | 12.671        | BB   | 0.4751      | 4445.34082   | 141.25862    | 50.2019 |
| 2      | 14.740        | BB   | 0.5772      | 4409.58545   | 114.00653    | 49.7981 |

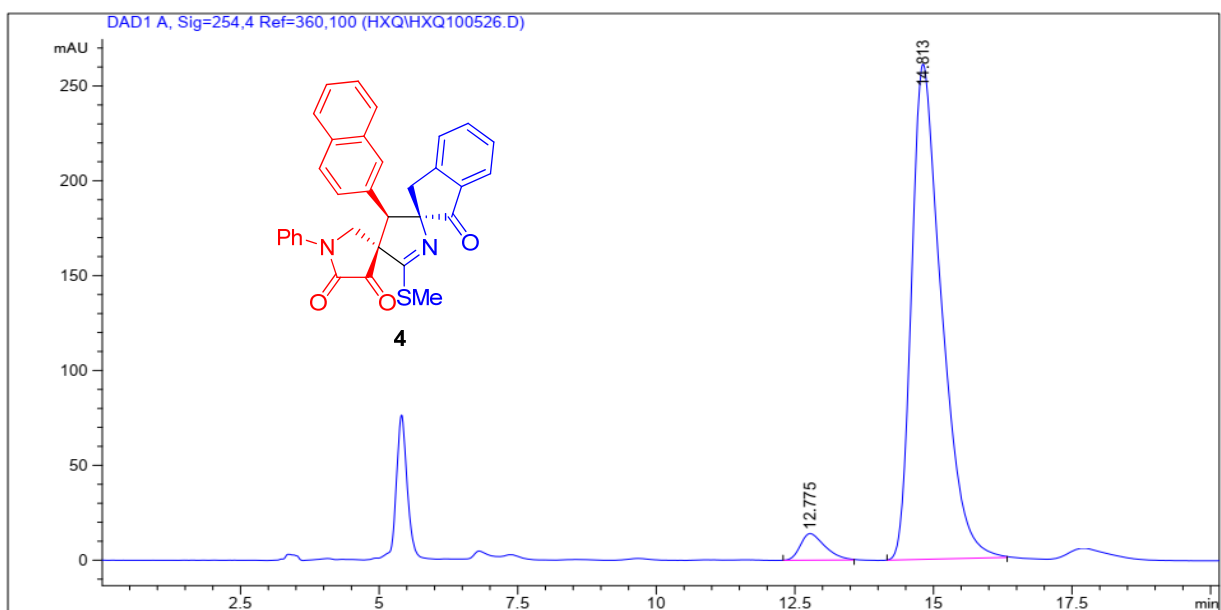

| Peak # | RetTime [min] | Type | Width [min] | Area [mAU*s] | Height [mAU] | Area %  |
|--------|---------------|------|-------------|--------------|--------------|---------|
| 1      | 12.775        | BB   | 0.4404      | 430.70996    | 14.02216     | 4.2048  |
| 2      | 14.813        | BB   | 0.5505      | 9812.46289   | 261.08298    | 95.7952 |

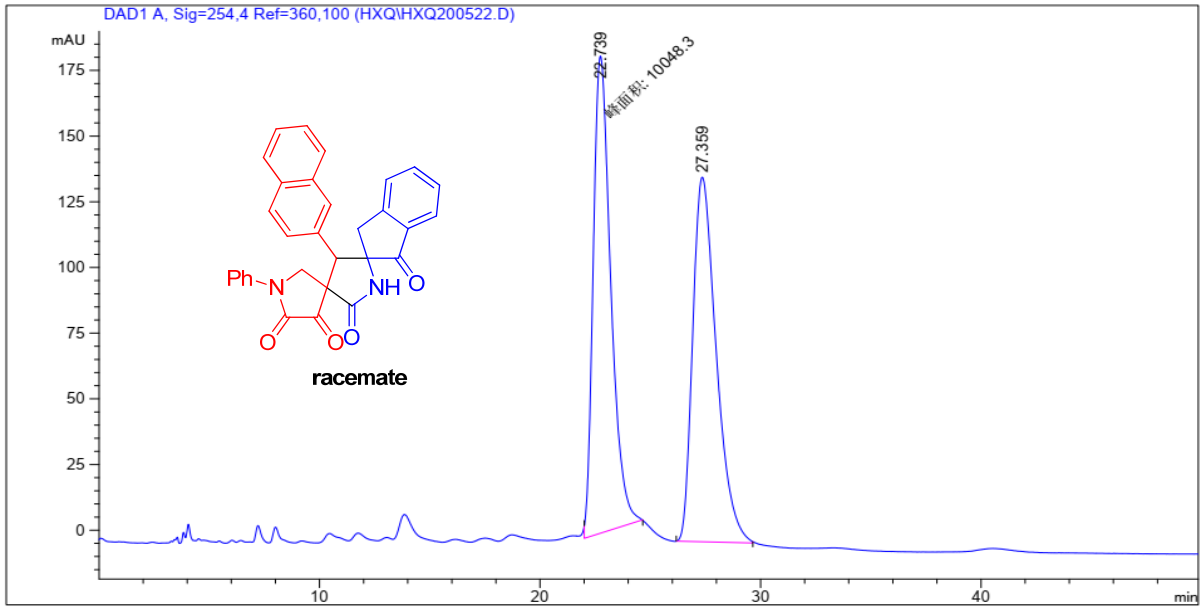

| Peak # | RetTime [min] | Type | Width [min] | Area [mAU*s] | Height [mAU] | Area %  |
|--------|---------------|------|-------------|--------------|--------------|---------|
| 1      | 22.739        | MM   | 0.9222      | 1.00483e4    | 181.59441    | 49.4784 |
| 2      | 27.359        | BB   | 1.1067      | 1.02601e4    | 138.75989    | 50.5216 |

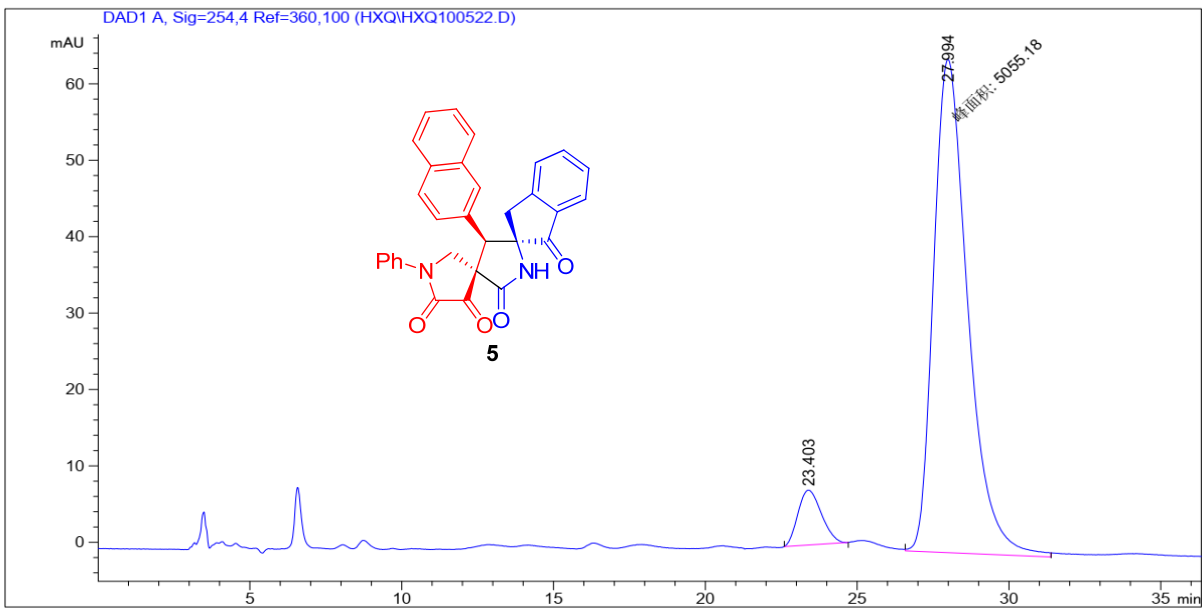

| Peak # | RetTime [min] | Type | Width [min] | Area [mAU*s] | Height [mAU] | Area %  |
|--------|---------------|------|-------------|--------------|--------------|---------|
| 1      | 23.403        | BB   | 0.6504      | 384.94244    | 7.16922      | 7.0760  |
| 2      | 27.994        | MM   | 1.3052      | 5055.17725   | 64.55166     | 92.9240 |
